# Supplementary material for: DMFDMA catalyzed synthesis of 2-((Dimethylamino)methylene)-3,4-dihydro-9-arylacridin-1(2H)-ones and their derivatives: in-vitro antifungal, antibacterial and antioxidant evaluations
Source: publisher site journal article supplement (doi:10.1515/chem-2018-0110), 2018-01-01
Supplement: Supplementary file 1 [file chem-2018-0110_sm.pdf]

Supplementary Information

Open Access

L. Jyothish Kumar, S. Sarveswari, V. Vijayakumar\*

# Supplement: DMFDMA catalyzed synthesis of 2-((Dimethylamino)methylene)-3,4-dihydro-9-arylacridin-1(2H)-ones and their derivatives: *in-vitro* antifungal, antibacterial and antioxidant evaluations

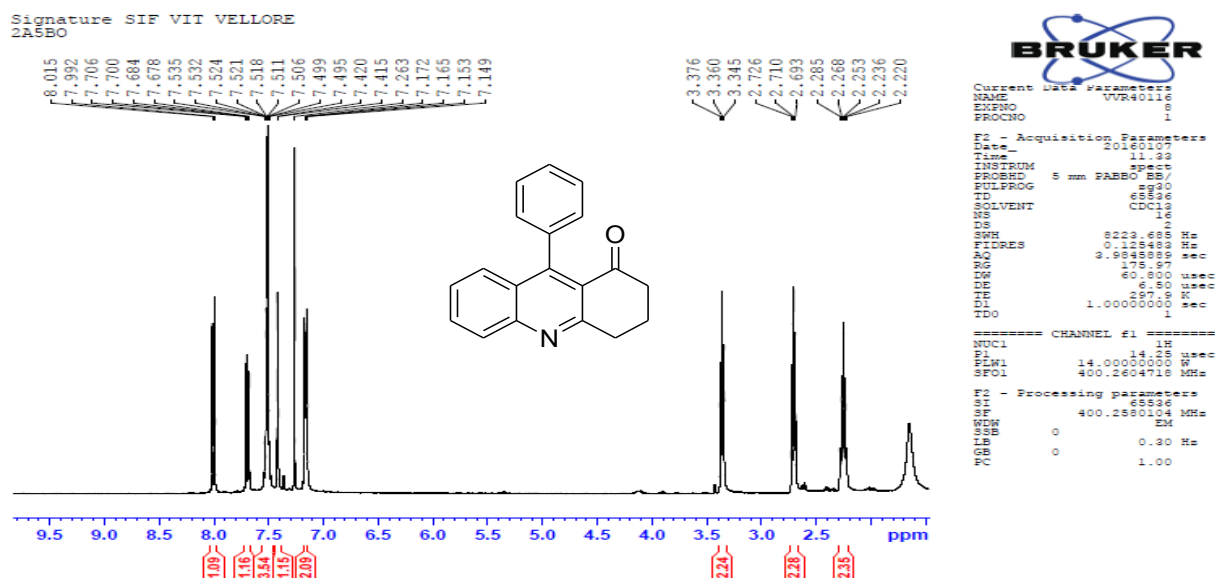

Figure 1: <sup>1</sup>H NMR spectrum of 3,4-dihydro-9-phenylacridin-1(2H)-one (2a):

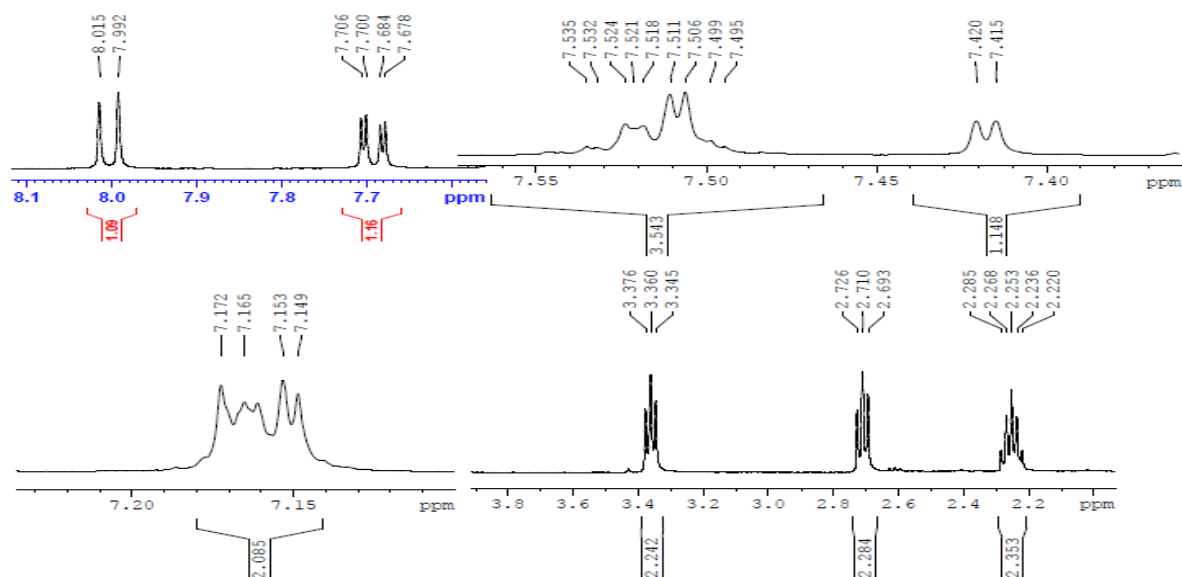

Figure 2: Enlarged  $^1\text{H}$  NMR spectrum of 3,4-dihydro-9-phenylacridin-1(2H)-one (2a):

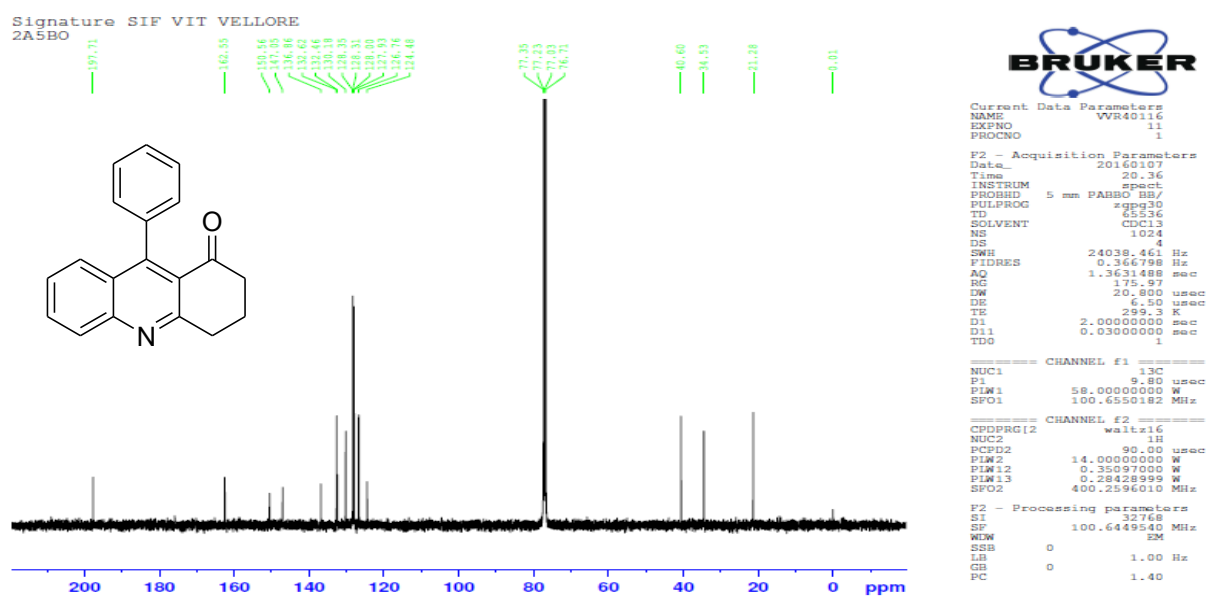

Figure 3:  $^{13}\text{C}$  NMR spectrum of 3,4-dihydro-9-phenylacridin-1(2H)-one (2a):

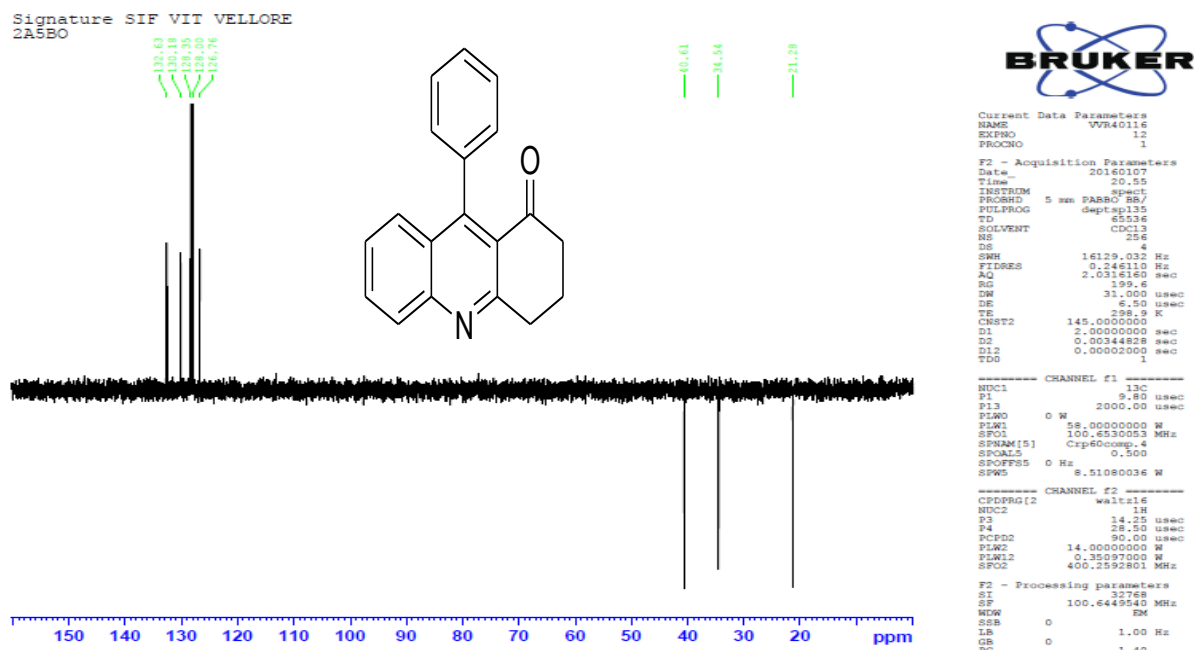

Figure 4: DEPT 135 spectrum of 3,4-dihydro-9-phenylacridin-1(2H)-one (2a):

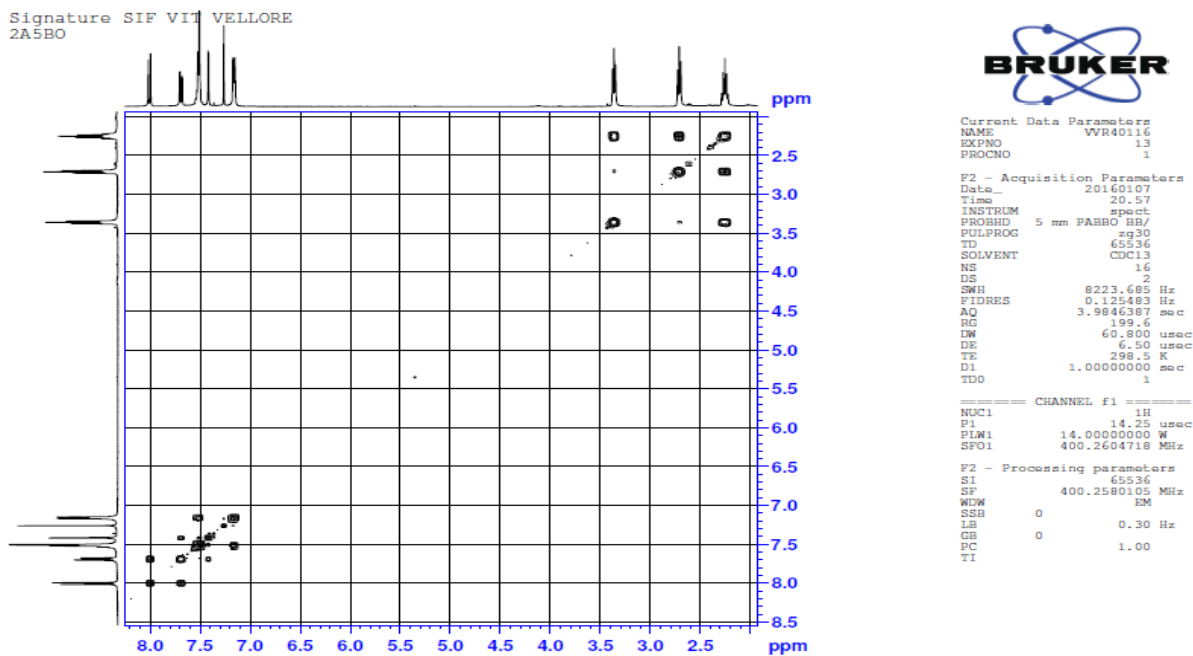

Figure 5: H-H COSY spectrum of 3,4-dihydro-9-phenylacridin-1(2H)-one (2a):

Signature SIF VIT VELLORE  
2A5BO

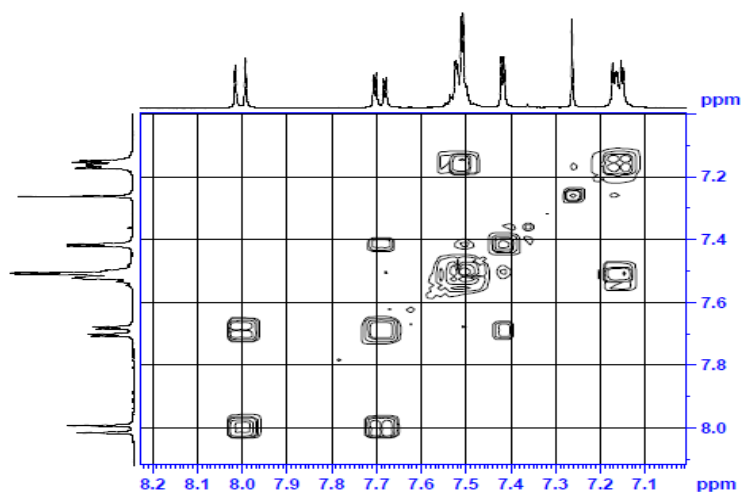

**BRUKER**

```

Current Data Parameters
NAME      VVR40116
EXPNO     8
PROCNO    1

F2 - Acquisition Parameters
Date_     20160107
Time      11.33
INSTRUM   spect
PROBHD    5 mm PABBO BB/
PULPROG   zg30
TD         65536
SOLVENT   CDCl3
NS         16
DS         2
SWH        8223.685 Hz
FIDRES     0.125483 Hz
AQ         3.9846387 sec
RG         178.97
DW         60.800 usec
DE         6.50 usec
TE         297.5 K
D1         1.00000000 sec
TD0        1

===== CHANNEL f1 =====
NUC1       1H
P1         14.25 usec
PLW1       14.00000000 W
SFO1       400.2604718 MHz

F2 - Processing parameters
SI         65536
SF         400.2580104 MHz
WDW        EM
SSB        0
LB         0.30 Hz
GB         0
PC         1.00
  
```

Figure 6: Enlarged H-H COSY spectrum of 3,4-dihydro-9-phenylacridin-1(2H)-one (2a):

Signature SIF VIT VELLORE  
2A5BO

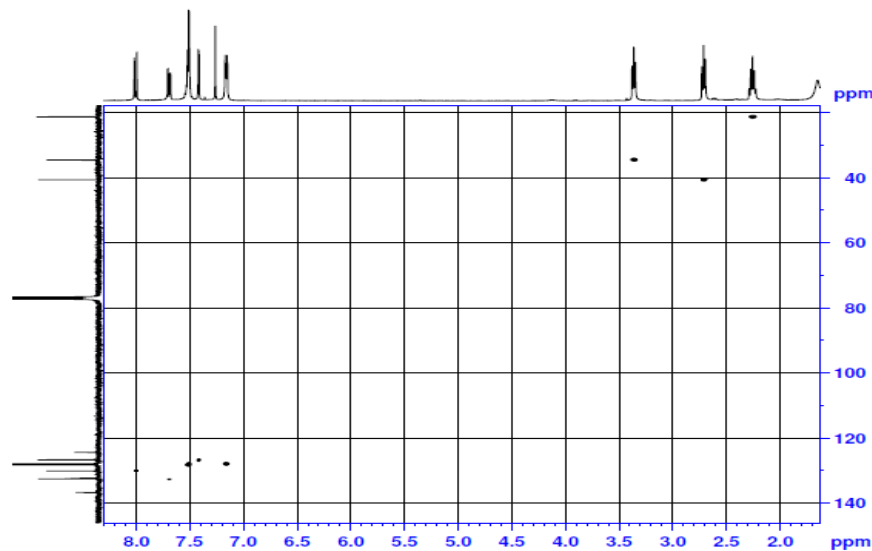

**BRUKER**

```

Current Data Parameters
NAME      VVR40116
EXPNO     13
PROCNO    1

F2 - Acquisition Parameters
Date_     20160107
Time      20.57
INSTRUM   spect
PROBHD    5 mm PABBO BB/
PULPROG   zg30
TD         65536
SOLVENT   CDCl3
NS         16
DS         2
SWH        8223.685 Hz
FIDRES     0.125483 Hz
AQ         3.9846387 sec
RG         178.97
DW         60.800 usec
DE         6.50 usec
TE         298.5 K
D1         1.00000000 sec
TD0        1

===== CHANNEL f1 =====
NUC1       13C
P1         14.25 usec
PLW1       14.00000000 W
SFO1       400.2604718 MHz

F2 - Processing parameters
SI         65536
SF         400.2580105 MHz
WDW        EM
SSB        0
LB         0.30 Hz
GB         0
PC         1.00
TI
  
```

Figure 7: HSQC of spectrum 3,4-dihydro-9-phenylacridin-1(2H)-one (2a):

Signature SIF VIT VELLORE  
2A5CO

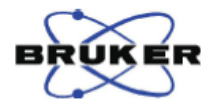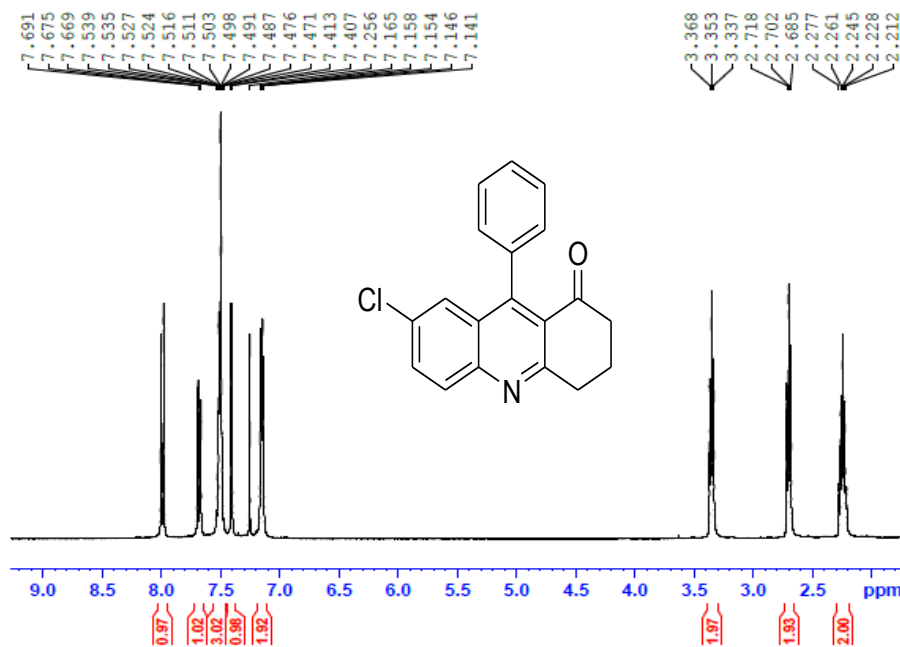

Current Data Parameters  
NAME Acridines raw data  
EXPNO 9  
PROCNO 1

F2 - Acquisition Parameters  
Date\_ 20160107  
Time 11.37  
INSTRUM spect  
PROBHD 5 mm PABBO BB/  
PULPROG zgpg30  
TD 65536  
SOLVENT CDCl3  
NS 16  
DS 2  
SWH 8223.685 Hz  
FIDRES 0.123483 Hz  
AQ 3.984589 sec  
RG 142.72  
LW 60.800 usec  
DE 6.50 usec  
TE 297.9 K  
D1 1.00000000 sec  
TD0 1

===== CHANNEL f1 =====  
NUC1 1H  
P1 14.23 usec  
PLW1 14.00000000 W  
SFO1 400.2604718 MHz

F2 - Processing parameters  
SI 65536  
SF 400.2580133 MHz  
WDW EM  
SSB 0  
LB 0.30 Hz  
GB 0  
PC 1.00

Figure 8:  $^1\text{H}$  NMR spectrum of 7-chloro-3,4-dihydro-9-phenylacridin-1(2H)-one (2b):

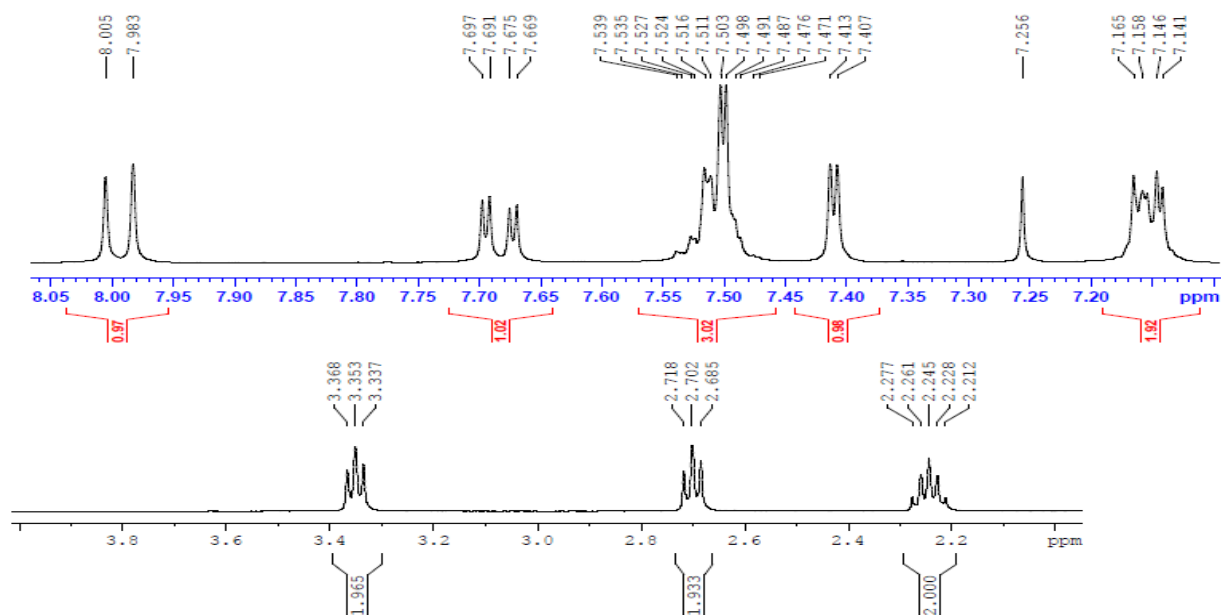

Figure 9: Enlarged  $^1\text{H}$  NMR spectrum of 7-chloro-3,4-dihydro-9-phenylacridin-1(2H)-one (2b):

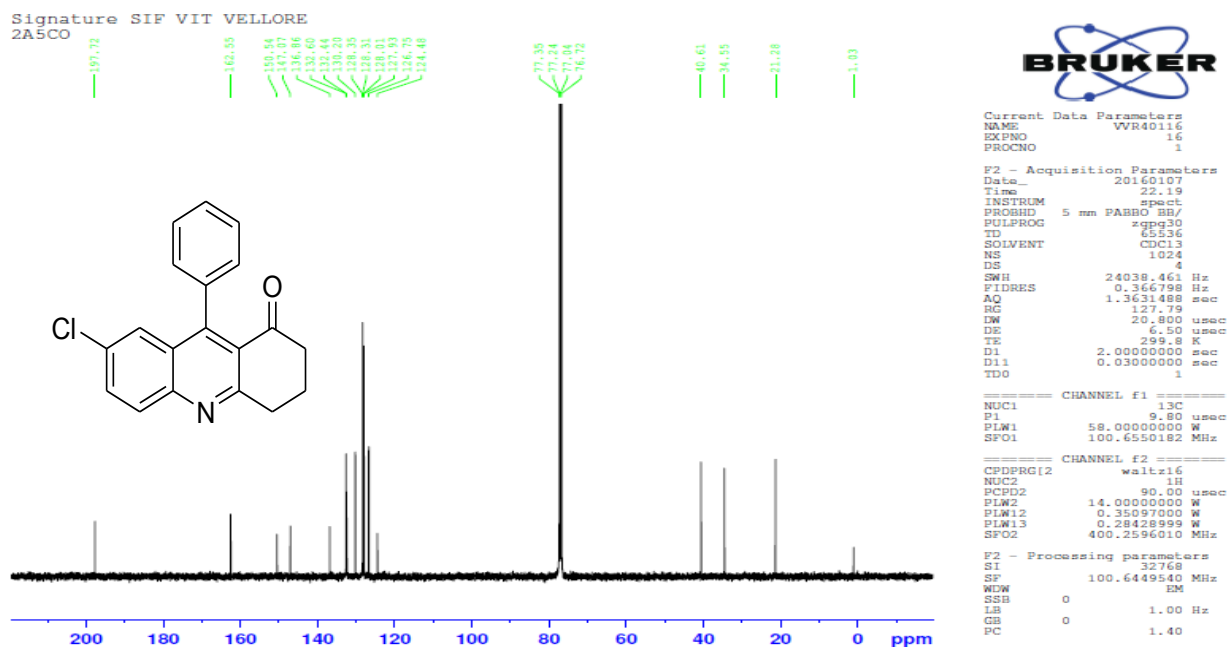Figure 10:  $^{13}\text{C}$  NMR spectrum of 7-chloro-3,4-dihydro-9-phenylacridin-1(2H)-one (2b):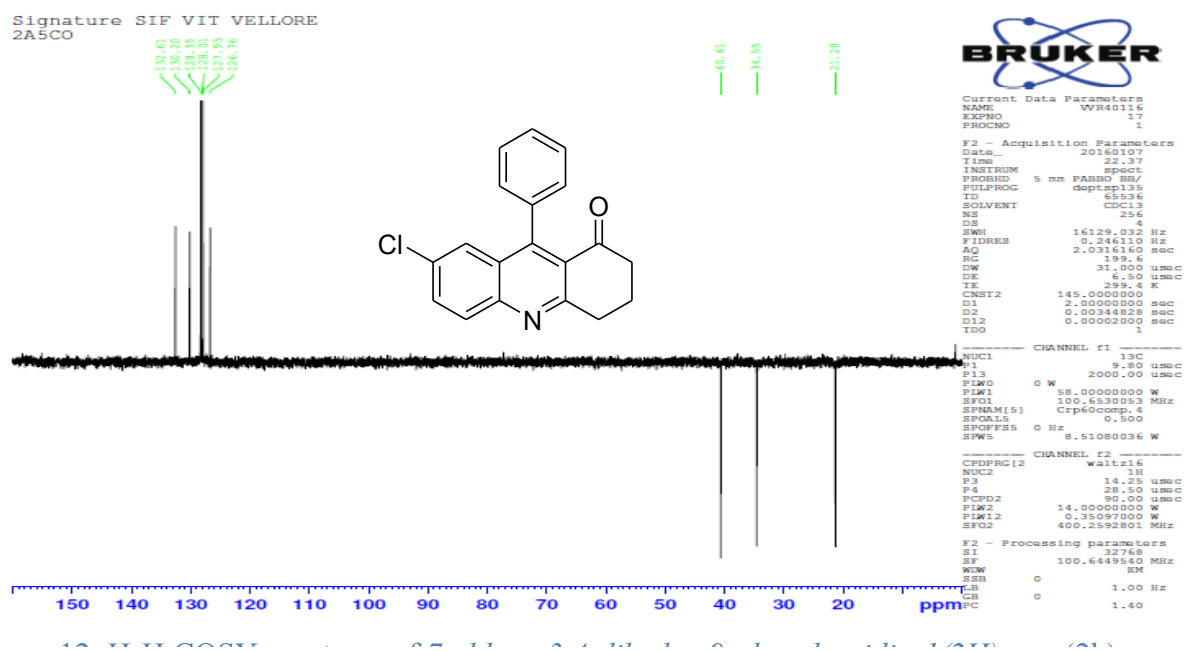

Figure 11: DEPT 135 spectrum of 7-chloro-3,4-dihydro-9-phenylacridin-1(2H)-one (2b):

Signature SIF VIT VELLORE  
2A5CO

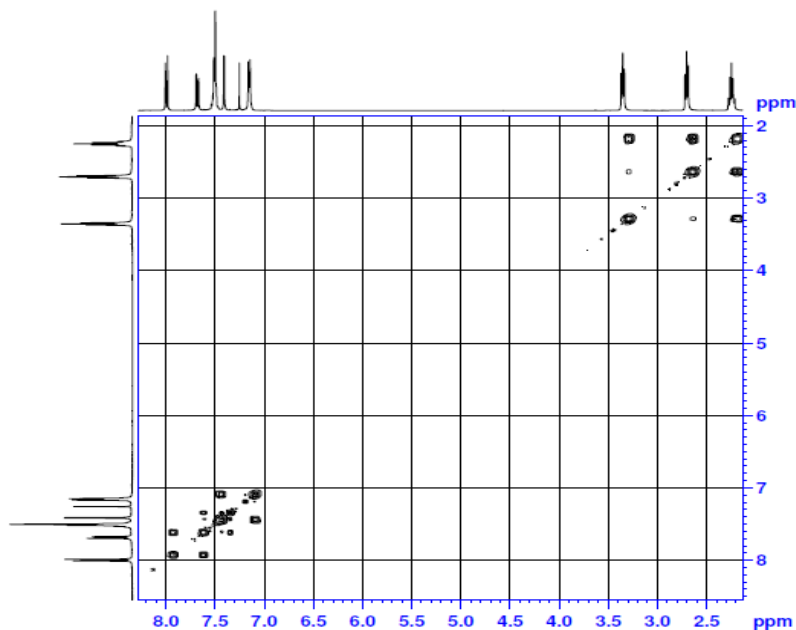

**BRUKER**

Current Data Parameters  
NAME VVR40116  
EXPNO 9  
PROCNO 1

F2 - Acquisition Parameters  
Date\_ 20160107  
Time 11.37  
INSTRUM spect  
PROBHD 5 mm PABBO BB/  
PULPROG zg30  
TD 65536  
SOLVENT CDCl<sub>3</sub>  
NS 16  
DS 2  
SWH 8223.685 Hz  
FIDRES 0.125483 Hz  
AQ 3.9845889 sec  
RG 143.73  
DW 60.800 usec  
DE 6.50 usec  
TE 297.9 K  
D1 1.00000000 sec  
TD0 1

===== CHANNEL f1 =====  
NUC1 1H  
P1 14.25 usec  
PLW1 14.00000000 W  
SFO1 400.2604718 MHz

F2 - Processing parameters  
SI 65536  
SF 400.2580133 MHz  
WDW EM  
SSB 0  
LB 0.30 Hz  
GB 0  
PC 1.00

Figure 12: H-H COSY spectrum of 7-chloro-3,4-dihydro-9-phenylacridin-1(2H)-one (2b):

Signature SIF VIT VELLORE  
2A5CO

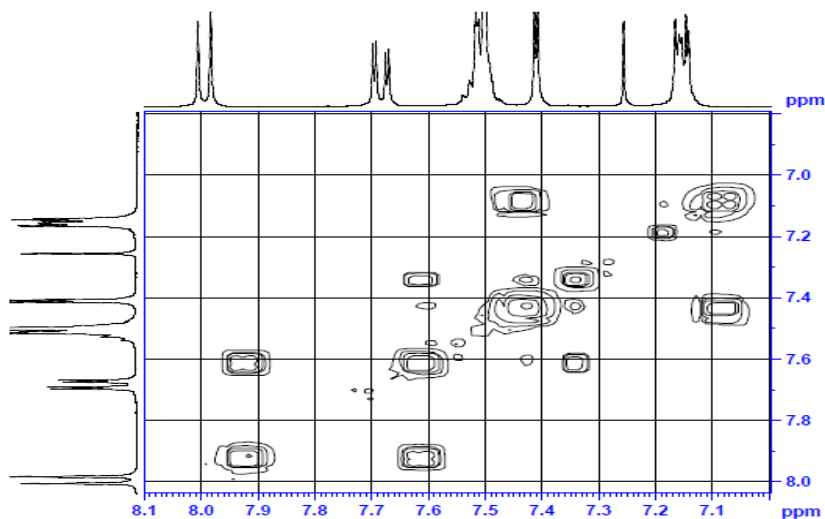

**BRUKER**

Current Data Parameters  
NAME VVR40116  
EXPNO 9  
PROCNO 1

F2 - Acquisition Parameters  
Date\_ 20160107  
Time 11.37  
INSTRUM spect  
PROBHD 5 mm PABBO BB/  
PULPROG zg30  
TD 65536  
SOLVENT CDCl<sub>3</sub>  
NS 16  
DS 2  
SWH 8223.685 Hz  
FIDRES 0.125483 Hz  
AQ 3.9845889 sec  
RG 143.73  
DW 60.800 usec  
DE 6.50 usec  
TE 297.9 K  
D1 1.00000000 sec  
TD0 1

===== CHANNEL f1 =====  
NUC1 1H  
P1 14.25 usec  
PLW1 14.00000000 W  
SFO1 400.2604718 MHz

F2 - Processing parameters  
SI 65536  
SF 400.2580133 MHz  
WDW EM  
SSB 0  
LB 0.30 Hz  
GB 0  
PC 1.00

Figure 13: Enlarged H-H COSY spectrum of 7-chloro-3,4-dihydro-9-phenylacridin-1(2H)-one (2b):

Signature SIF VIT VELLORE  
2A5CO

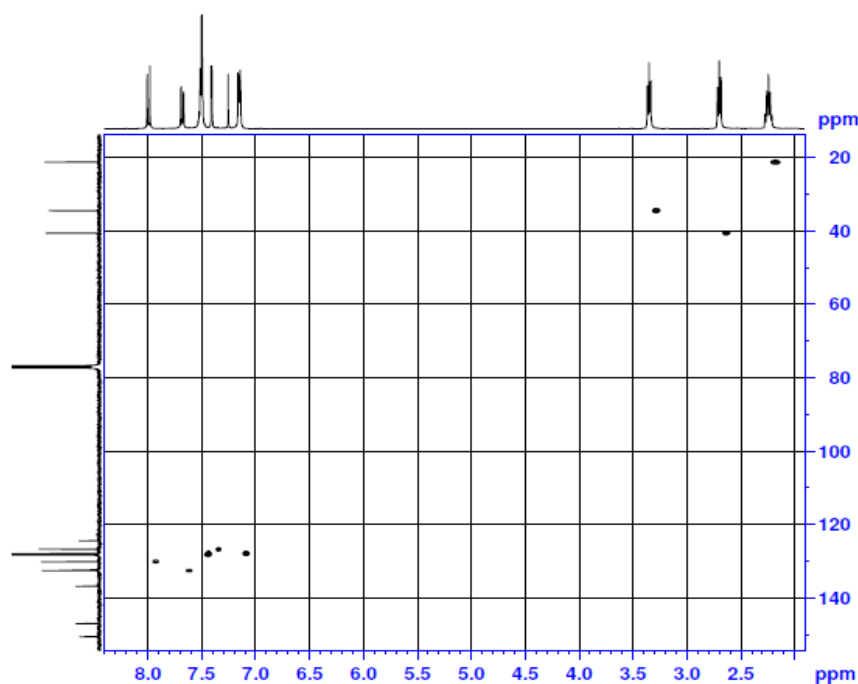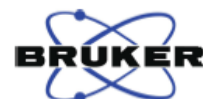

Current Data Parameters  
NAME VWR40116  
EXPNO 9  
PROCNO 1

F2 - Acquisition Parameters  
Date\_ 20160107  
Time 11.37  
INSTRUM spect  
PROBHD 5 mm PABBO BB/  
PULPROG zg30  
TD 65536  
SOLVENT CDCl3  
NS 16  
DS 2  
SWH 8223.685 Hz  
FIDRES 0.125483 Hz  
AQ 3.9845889 sec  
RG 143.73  
DW 60.800 usec  
DE 6.50 usec  
TE 297.9 K  
D1 1.00000000 sec  
TDO 1

===== CHANNEL f1 =====  
NUC1 1H  
P1 14.25 usec  
PLW1 14.00000000 W  
SFO1 400.2604718 MHz

F2 - Processing parameters  
SI 65536  
SF 400.2580133 MHz  
WDW EM  
SSB 0  
LB 0.30 Hz  
GB 0  
PC 1.00

Figure 14: HSQC spectrum of 7-chloro-3,4-dihydro-9-phenylacridin-1(2H)-one (2b):

Signature SIF VIT VELLORE  
2ACLLO

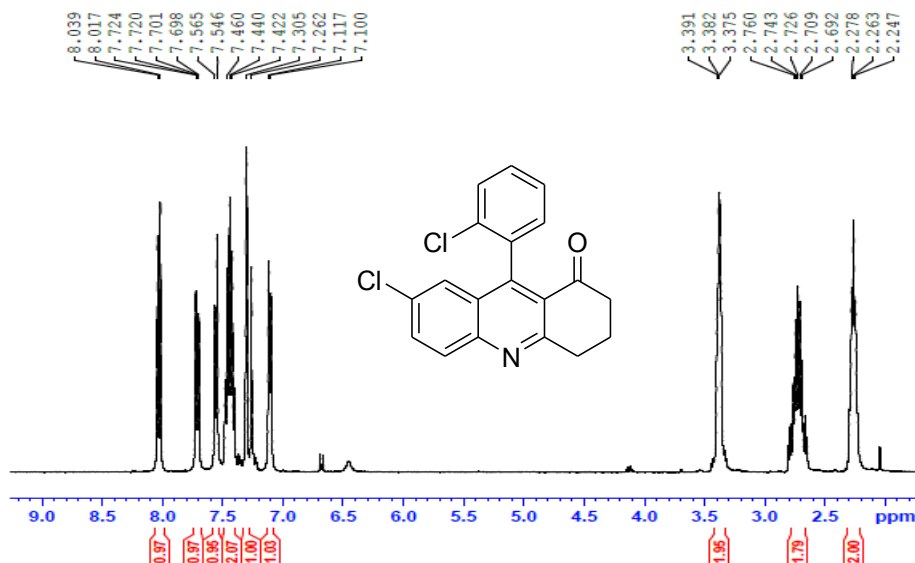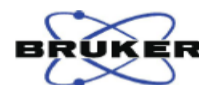

Current Data Parameters  
NAME Acidines raw data  
EXPNO 53  
PROCNO 1

F2 - Acquisition Parameters  
Date\_ 20151125  
Time 15.57  
INSTRUM spect  
PROBHD 5 mm PABBO BB/  
PULPROG zg30  
TD 65536  
SOLVENT CDCl3  
NS 16  
DS 2  
SWH 8223.685 Hz  
FIDRES 0.125483 Hz  
AQ 3.9845889 sec  
RG 175.97  
DW 60.800 usec  
DE 6.50 usec  
TE 301.3 K  
D1 1.00000000 sec  
TDO 1

===== CHANNEL f1 =====  
NUC1 1H  
P1 14.25 usec  
PLW1 14.00000000 W  
SFO1 400.2604718 MHz

F2 - Processing parameters  
SI 65536  
SF 400.2580133 MHz  
WDW EM  
SSB 0  
LB 0.30 Hz  
GB 0  
PC 1.00

Figure 15: <sup>1</sup>H NMR spectrum of 7-chloro-9-(2-chlorophenyl)-3,4-dihydroacridin-1(2H)-one (2c):



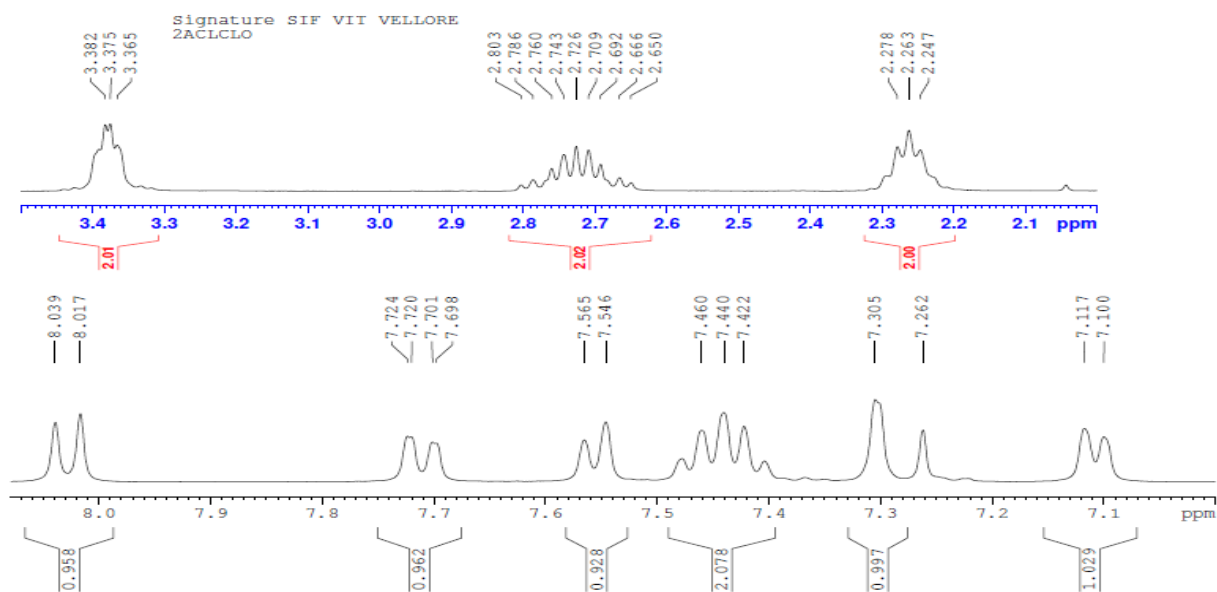

Figure 16: Enlarged <sup>1</sup>H NMR spectrum of 7-chloro-9-(2-chlorophenyl)-3,4-dihydroacridin-1(2H)-one (2c):

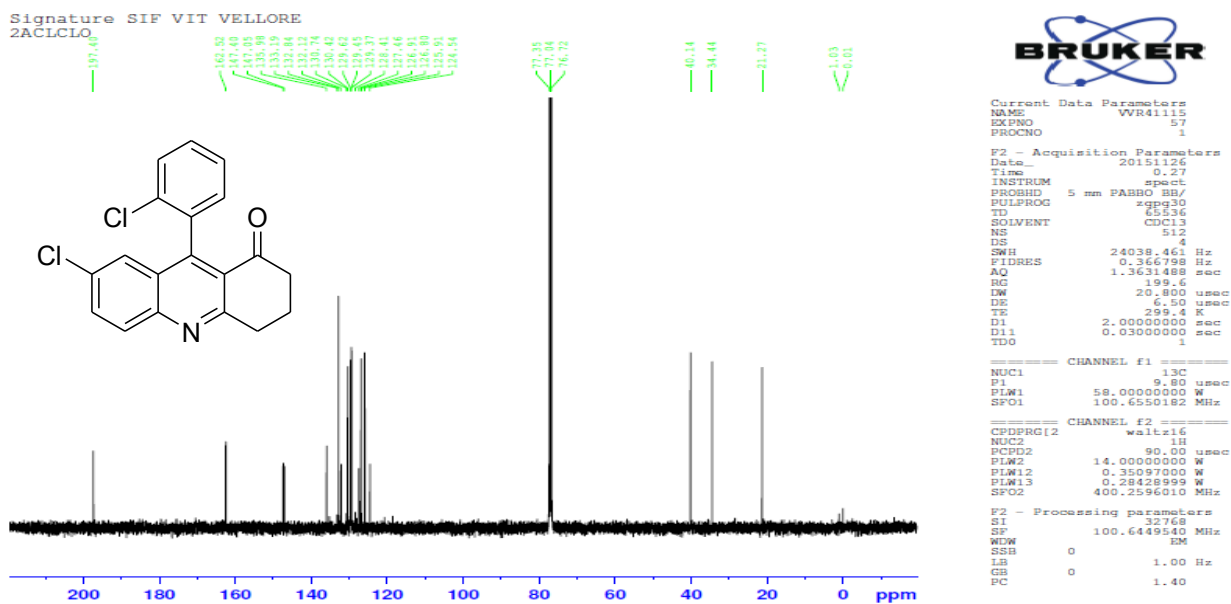

Figure 17: <sup>13</sup>C NMR spectrum of 7-chloro-9-(2-chlorophenyl)-3,4-dihydroacridin-1(2H)-one (2c) :

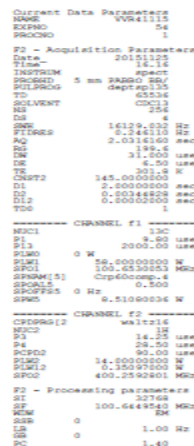

Signature SIF VIT VELLORE  
2ACLCLO

Current Data Parameters  
NAME VVR41115  
EXPNO 10  
PROCNO 1

F2 - Acquisition Parameters  
Date\_ 20111115  
Time 16.16  
INSTRUM spect  
PROBHD 5 mm PABBO BB/  
PULPROG zgpg30  
TD 65536  
SOLVENT cnc13  
NS 8  
DS 3  
SWH 3750.398 Hz  
FIDRES 1.835644 Hz  
AQ 0.273365 sec  
RG 112.69  
SW 133.00 Hz  
DE 35.40 Hz  
TE 301.2 K  
DO 0.0000000 sec  
D1 1.91395 sec  
D11 0.0300000 sec  
D13 0.0300000 sec  
D15 0.0000400 sec  
D16 0.0002000 sec  
D19 0.0002600 sec

CHANNEL F1  
NUC1 13C  
P1 14.25 sec  
P2 14.25 sec  
P17 2500.00 sec  
P18 14.0000000 sec  
P19 4.20539999 sec  
SFO1 400.253005 MHz

GRADIENT CHANNEL  
GPRM[1] SMCQ0.100  
GPI1 16.00 s  
P16 1000.00 sec

F1 - Acquisition parameters  
TD 65536  
SFO1 400.253005 MHz  
FIDRES 1.835644 Hz  
SW 133.00 Hz  
PULPROG zgpg30

F2 - Processing parameters  
SI 32768  
SF 400.258011 MHz  
GB 0  
WDW 0  
SSB 0 Hz  
LB 0 Hz  
GB 0  
PC 1.40

F1 - Processing parameters  
SI 1024  
MC2 0  
SF 400.258011 MHz  
WDW 0  
SSB 0  
LB 0 Hz  
GB 0

**Figure 19:** H-H COSY spectrum of 7-chloro-9-(2-chlorophenyl)-3,4-dihydroacridin-1(2H)-one (2c):

Signature SIF VIT VELLORE  
2ACLCLO

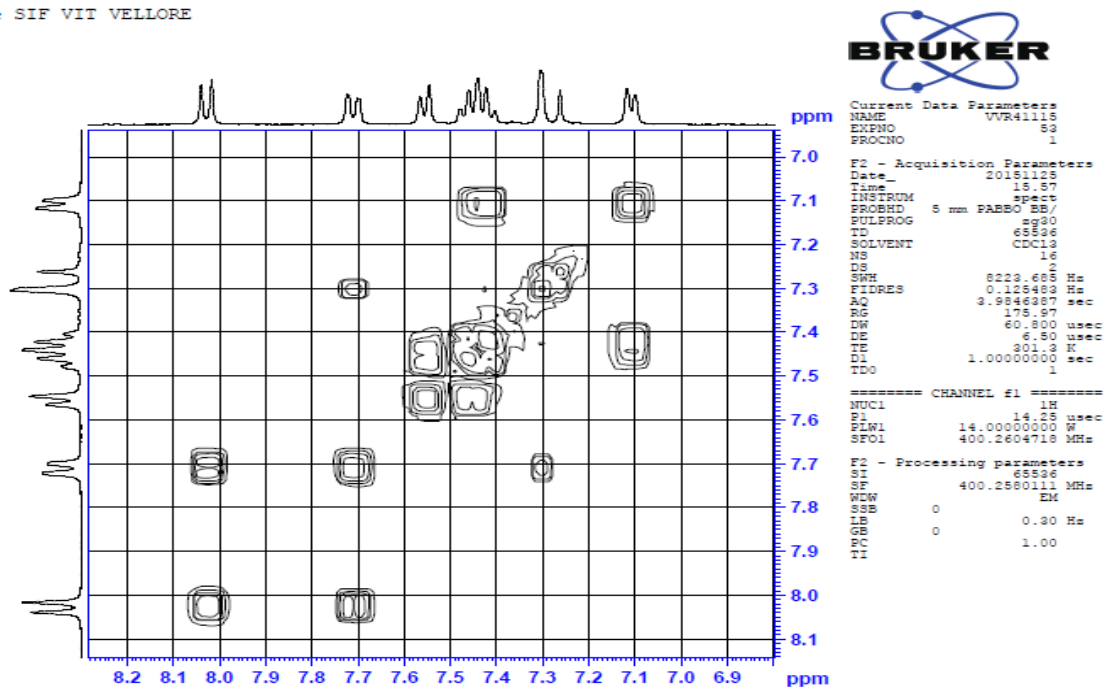

Figure 20: Enlarged H-H COSY spectrum of 7-chloro-9-(2-chlorophenyl)-3,4-dihydroacridin-1(2H)-one (2c):

Signature SIF VIT VELLORE  
2ACLCLO

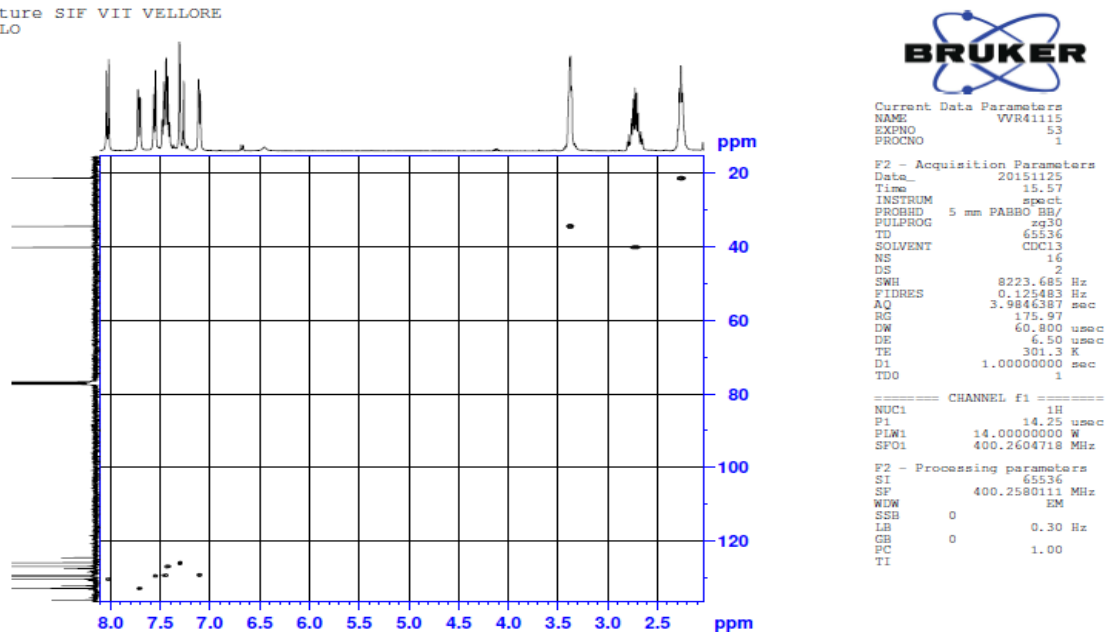

Figure 21: Enlarged HSQC spectrum of 7-chloro-9-(2-chlorophenyl)-3,4-dihydroacridin-1(2H)-one (2c):

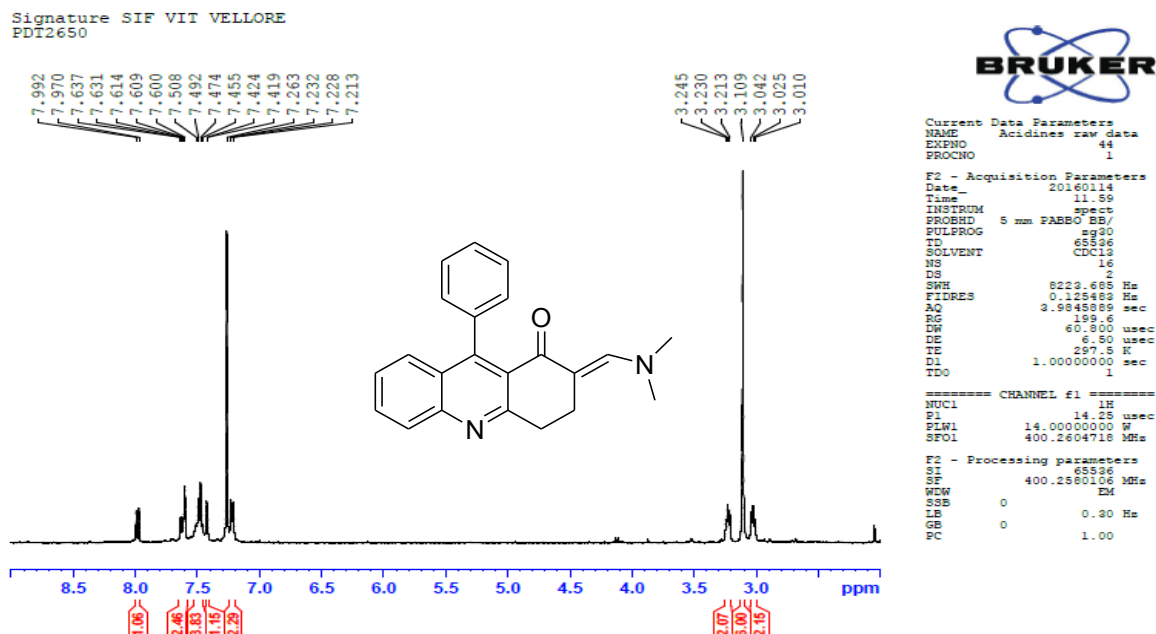

Figure 22:  $^1\text{H}$  NMR spectrum of (E)-2-((dimethylamino)methylene)-3,4-dihydro-9-phenylacridin-1(2H)-one (3a):

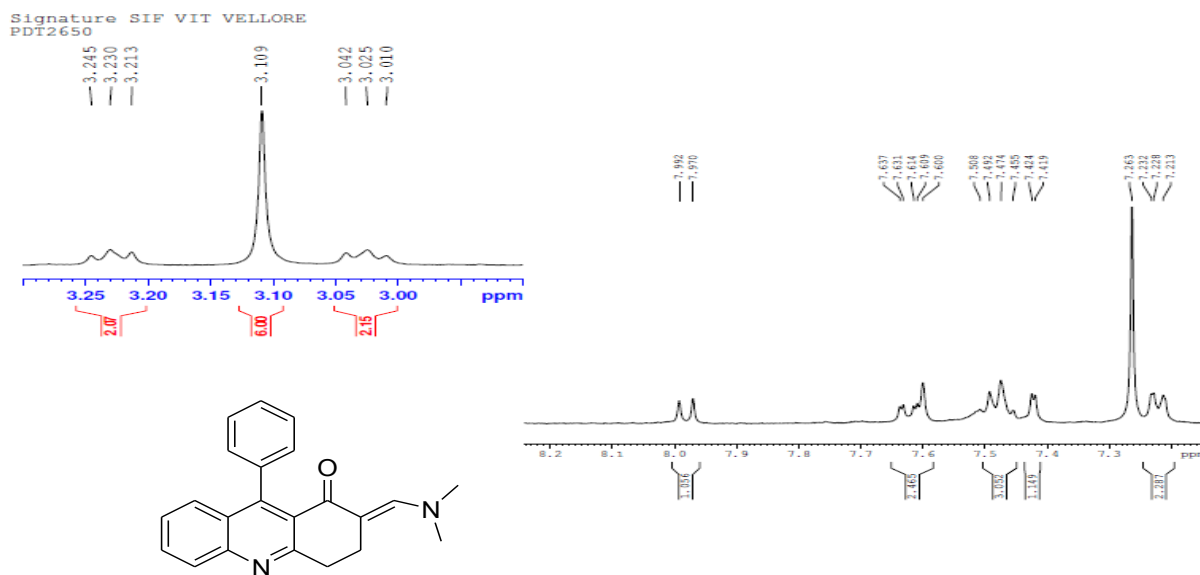

Figure 23: Enlarged  $^1\text{H}$  NMR spectrum of (E)-2-((dimethylamino)methylene)-3,4-dihydro-9-phenylacridin-1(2H)-one (3a):

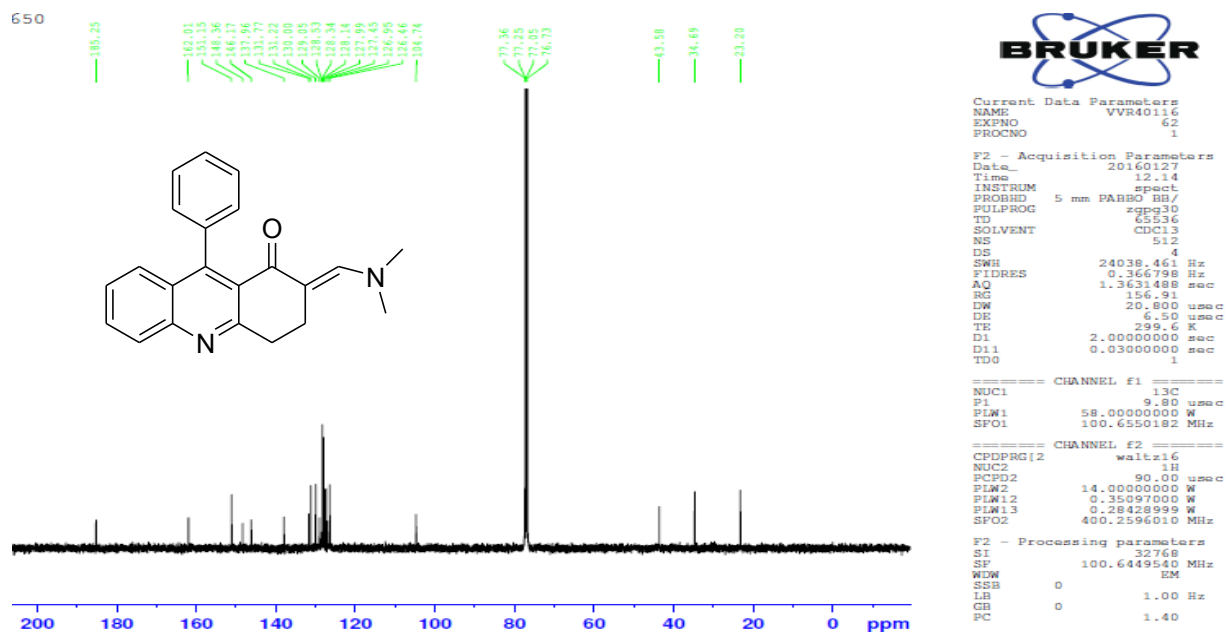

Figure 24:  $^{13}\text{C}$  NMR spectrum of (*E*)-2-((dimethylamino)methylene)-3,4-dihydro-9-phenylacridin-1(2*H*)-one (3a):

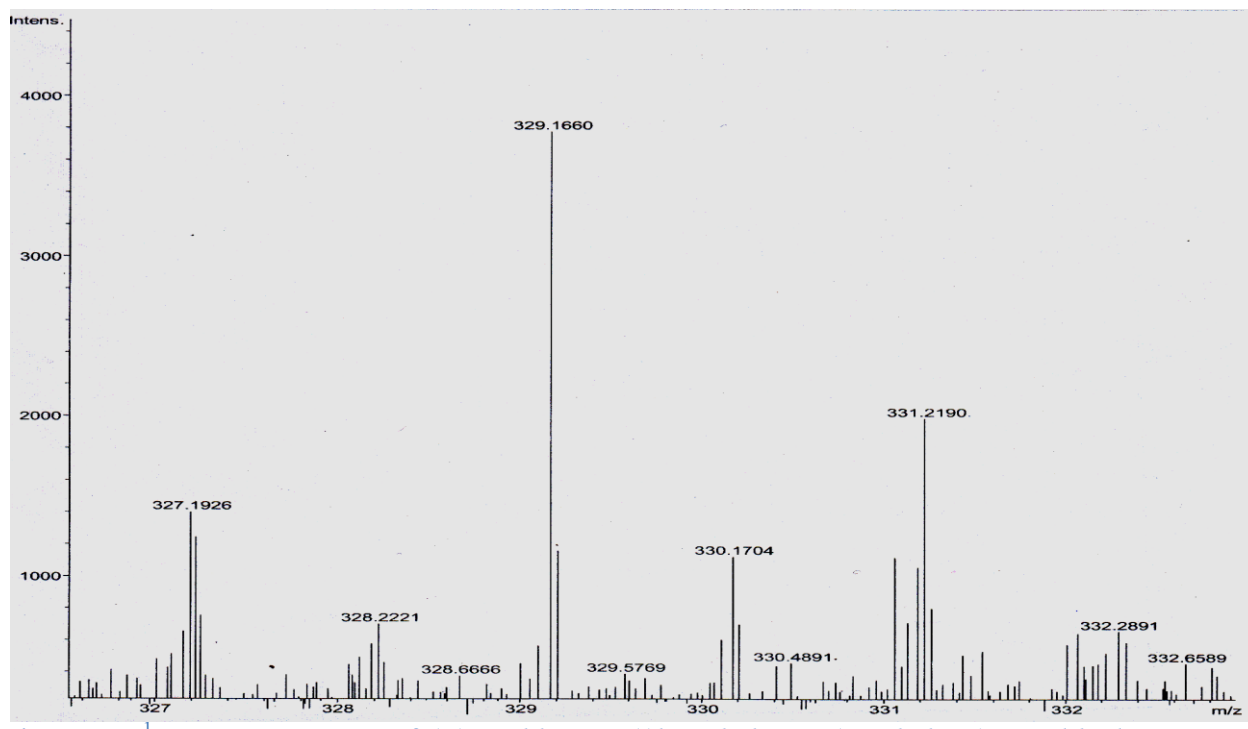

Figure 25: HRMS of (*E*)-2-((dimethylamino)methylene)-3,4-dihydro-9-phenylacridin-1(2*H*)-one (3a):

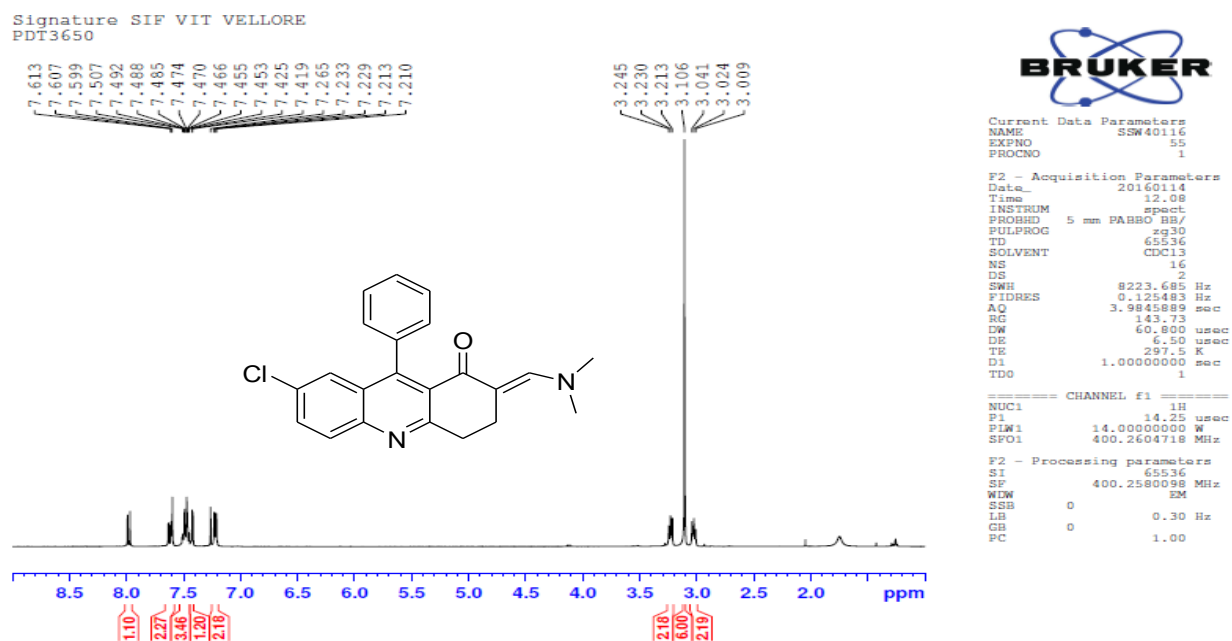

Figure 26:  $^1\text{H}$  NMR spectrum of (E)-7-chloro-2-((dimethylamino)methylene)-3,4-dihydro-9-phenylacridin-1(2H)-one (3b):

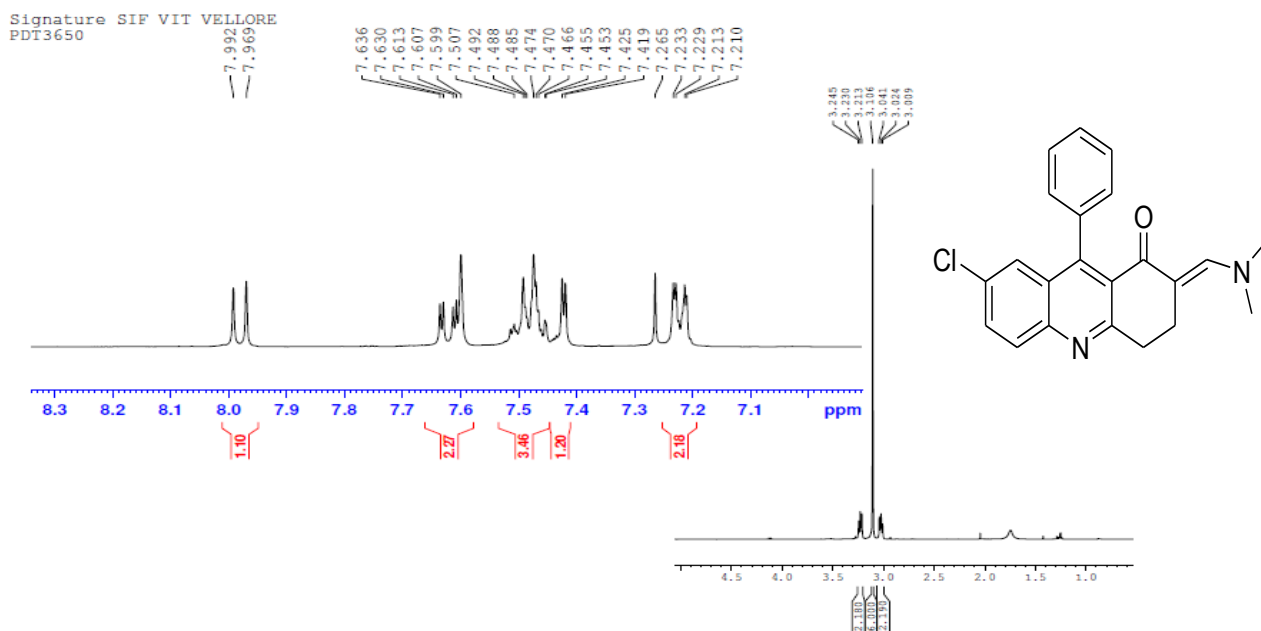

Figure 27: Enlarged  $^1\text{H}$  NMR spectrum of (E)-7-chloro-2-((dimethylamino)methylene)-3,4-dihydro-9-phenylacridin-1(2H)-one (3b):

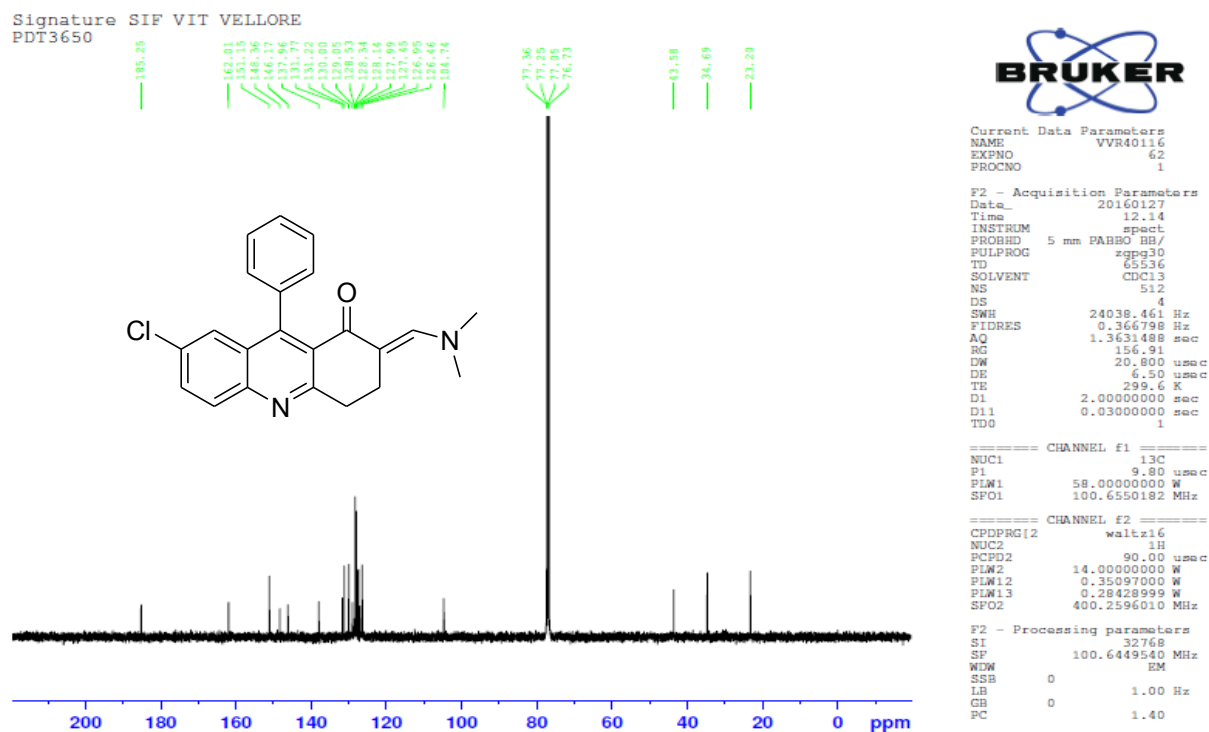Figure 28:  $^{13}\text{C}$  NMR spectrum of (E)-7-chloro-2-((dimethylamino)methylene)-3,4-dihydro-9-phenylacridin-1(2H)-one (3b):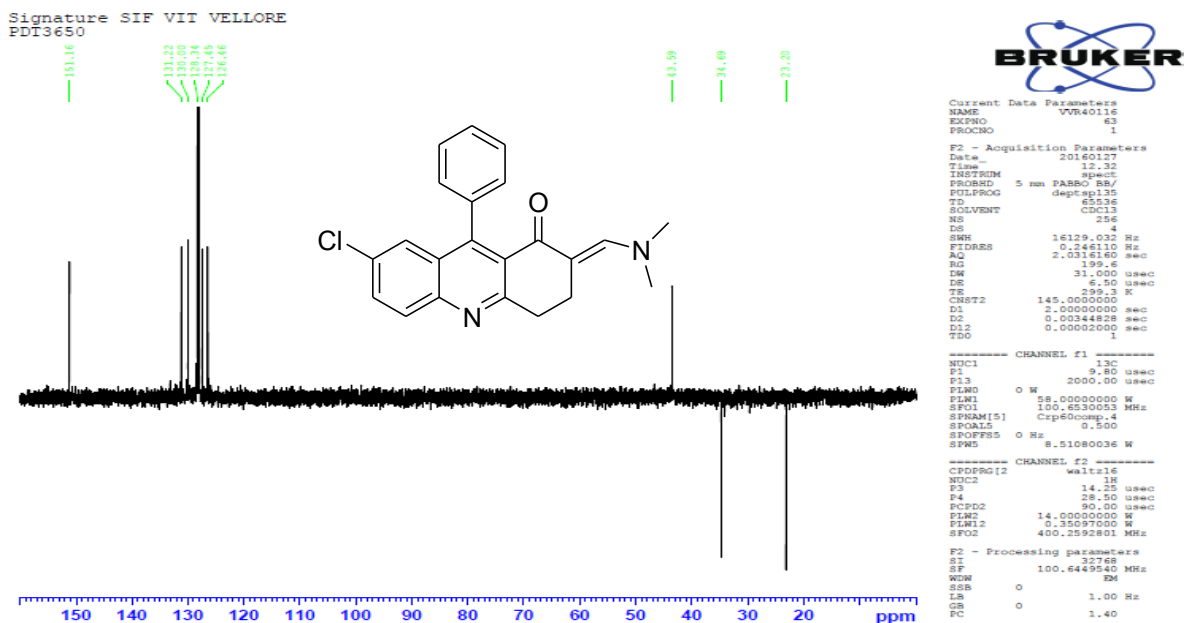

Figure 29: DEPT-135 spectrum of (E)-7-chloro-2-((dimethylamino)methylene)-3,4-dihydro-9-phenylacridin-1(2H)-one (3b):

Signature SIF VIT VELLORE  
PDT3650

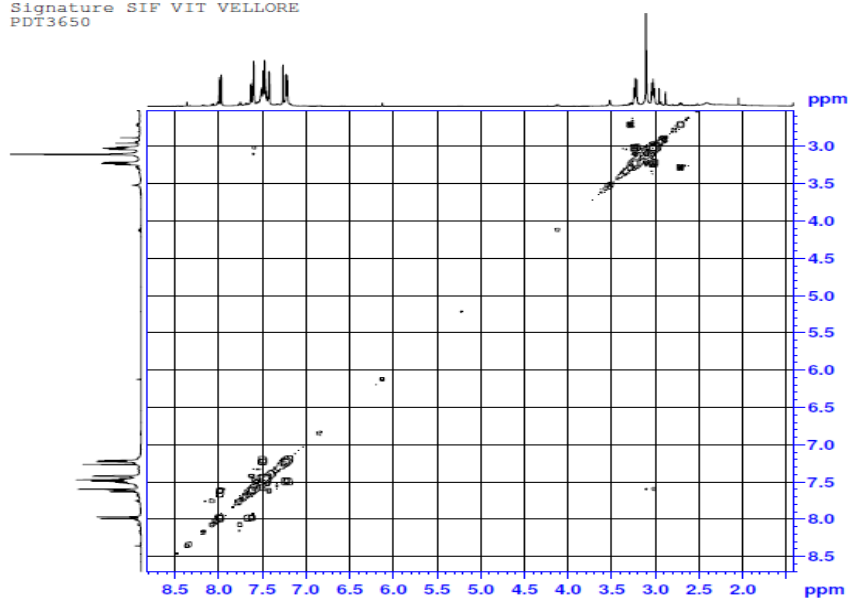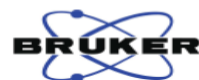

Current Data Parameters  
NAME VVR40116  
EXPNO 61  
PROCNO 1

F2 - Acquisition Parameters  
Date\_ 20160127  
Time 11.43  
INSTRUM spect  
PROBHD 5 mm PABBO BB/  
PULPROG zg30  
TD 65536  
SOLVENT CDCl3  
NS 16  
DS 2  
SWH 8223.685 Hz  
FIDRES 0.125483 Hz  
AQ 3.9846387 sec  
RG 143.73  
DW 60.800 usec  
DE 6.50 usec  
TE 298.3 K  
D1 1.00000000 sec  
TDO 1

===== CHANNEL f1 =====  
NUC1 1H  
P1 14.25 usec  
PLW1 14.00000000 W  
SFO1 400.2604718 MHz

F2 - Processing parameters  
SI 65536  
SF 400.2580095 MHz  
WDW EM  
SSB 0  
LB 0.30 Hz  
GB 0  
PC 1.00  
TI

Figure 30: H-H COSY spectrum of (*E*)-7-chloro-2-((dimethylamino)methylene)-3,4-dihydro-9-phenylacridin-1(2H)-one (3b):

Signature SIF VIT VELLORE  
PDT3650

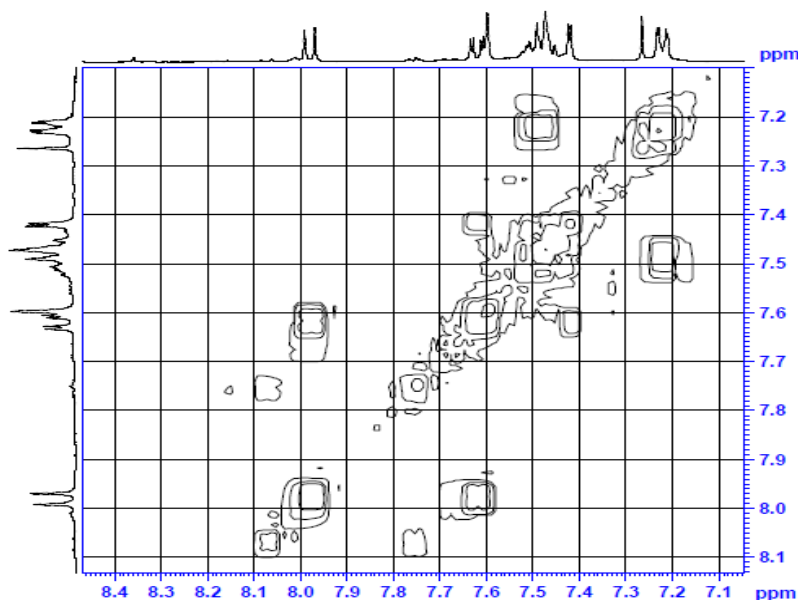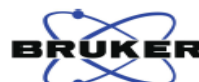

Current Data Parameters  
NAME VVR40116  
EXPNO 61  
PROCNO 1

F2 - Acquisition Parameters  
Date\_ 20160127  
Time 11.43  
INSTRUM spect  
PROBHD 5 mm PABBO BB/  
PULPROG zg30  
TD 65536  
SOLVENT CDCl3  
NS 16  
DS 2  
SWH 8223.685 Hz  
FIDRES 0.125483 Hz  
AQ 3.9846387 sec  
RG 143.73  
DW 60.800 usec  
DE 6.50 usec  
TE 298.3 K  
D1 1.00000000 sec  
TDO 1

===== CHANNEL f1 =====  
NUC1 1H  
P1 14.25 usec  
PLW1 14.00000000 W  
SFO1 400.2604718 MHz

F2 - Processing parameters  
SI 65536  
SF 400.2580095 MHz  
WDW EM  
SSB 0  
LB 0.30 Hz  
GB 0  
PC 1.00  
TI

Figure 31: Enlarged H-H COSY spectrum of (*E*)-7-chloro-2-((dimethylamino)methylene)-3,4-dihydro-9-phenylacridin-1(2H)-one (3b):



Signature SIF VIT VELLORE  
PDT3650

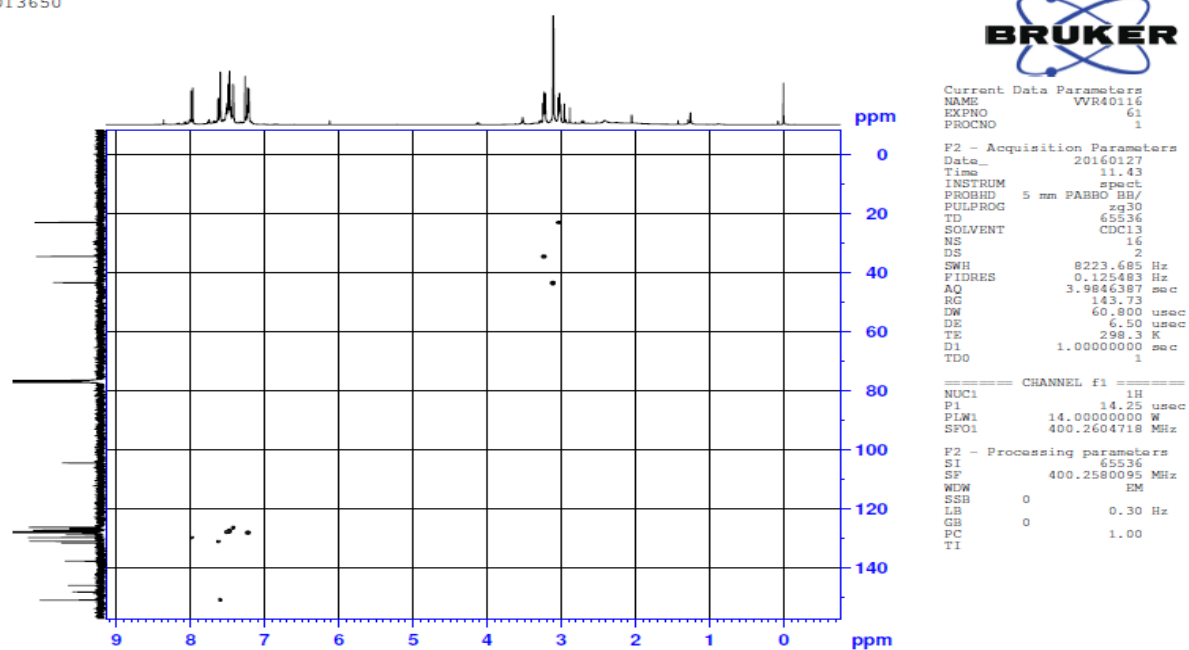

Figure 32: HSQC spectrum of (E)-7-chloro-2-((dimethylamino)methylene)-3,4-dihydro-9-phenylacridin-1(2H)-one (3b):

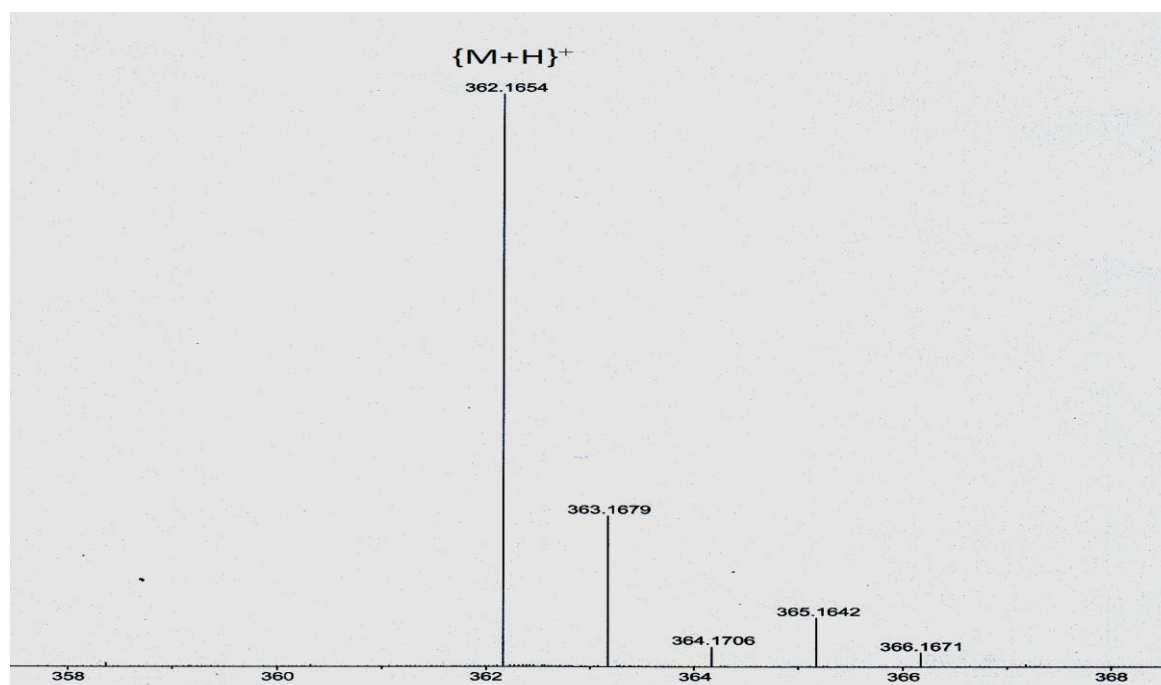

Figure 33: HRMS of (E)-7-chloro-2-((dimethylamino)methylene)-3,4-dihydro-9-phenylacridin-1(2H)-one(3b):

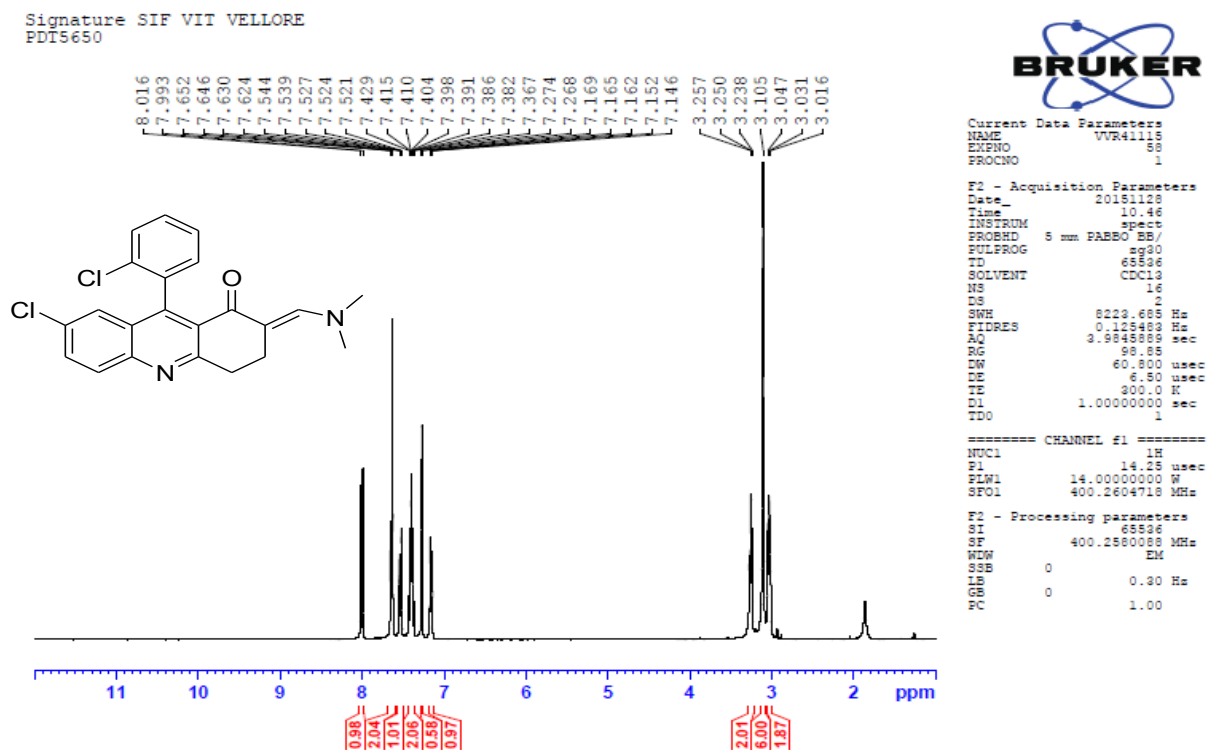

Figure 34:  $^1\text{H}$  NMR spectrum of (E)-7-chloro-9-(2-chlorophenyl)-2-((dimethylamino)methylene)-3,4-dihydroacridin-1(2H)-one (3c):

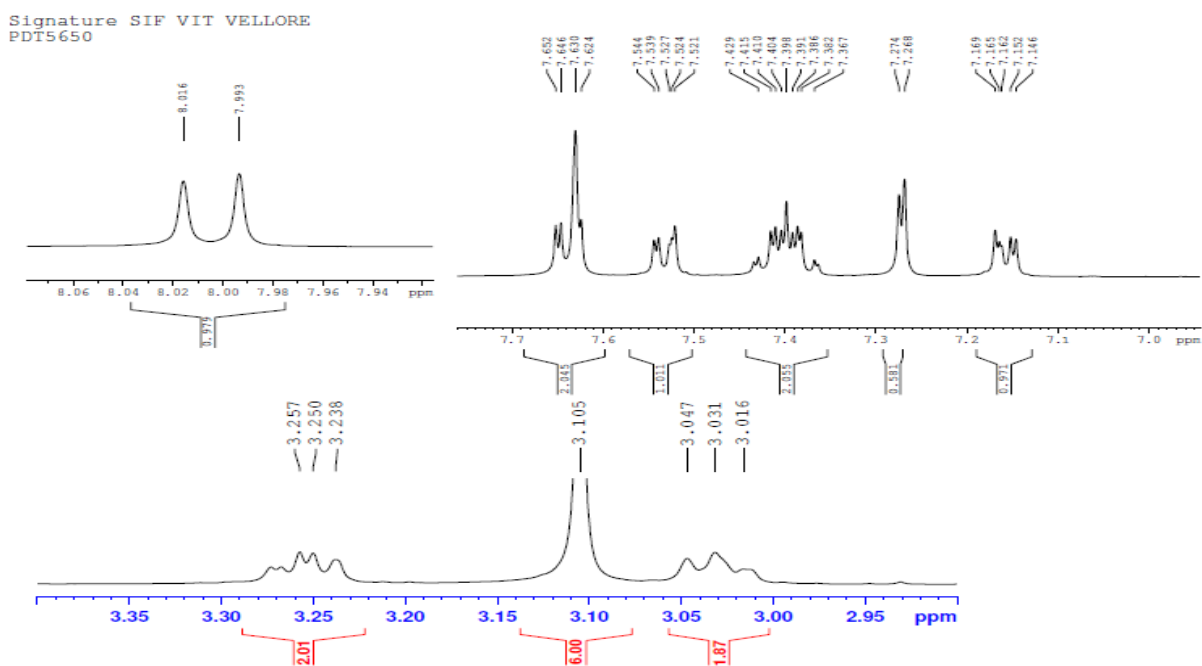

Figure 35: Enlarged  $^1\text{H}$  NMR spectrum of (E)-7-chloro-9-(2-chlorophenyl)-2-((dimethylamino)methylene)-3,4-dihydroacridin-1(2H)-one (3c):

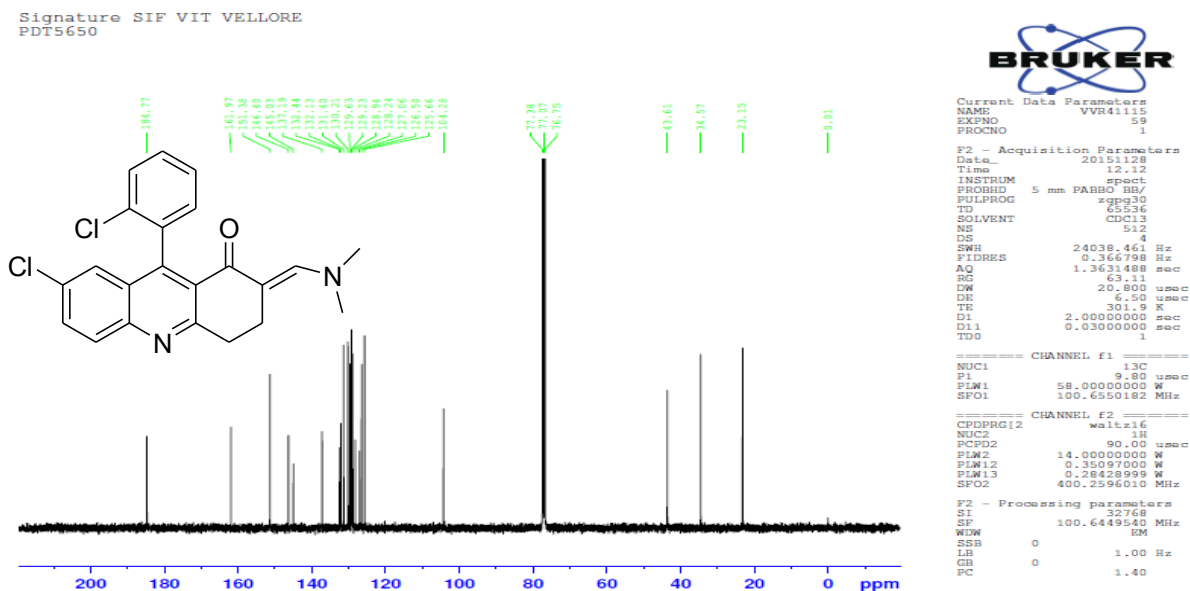Figure 36:  $^{13}\text{C}$  NMR spectrum of *(E)*-7-chloro-9-(2-chlorophenyl)-2-((dimethylamino)methylene)-3,4-dihydroacridin-1(2H)-one (3c):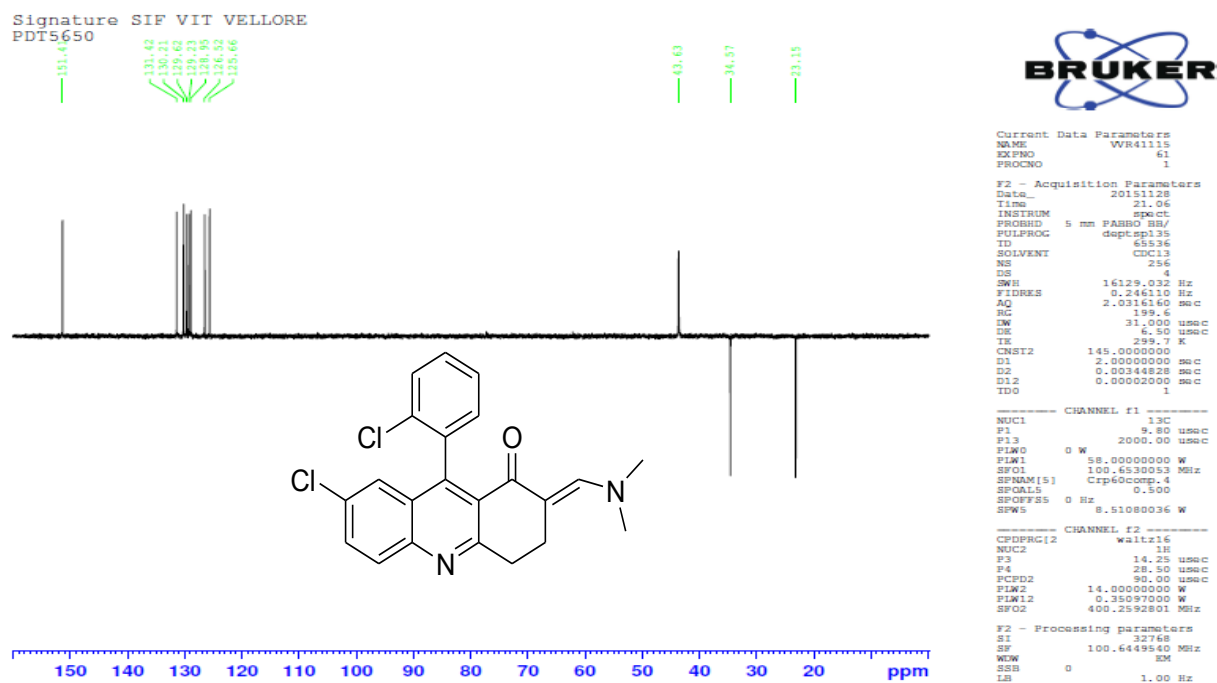Figure 37: DEPT-135 spectrum of *(E)*-7-chloro-9-(2-chlorophenyl)-2-((dimethylamino)methylene)-3,4-dihydroacridin-1(2H)-one (3c):

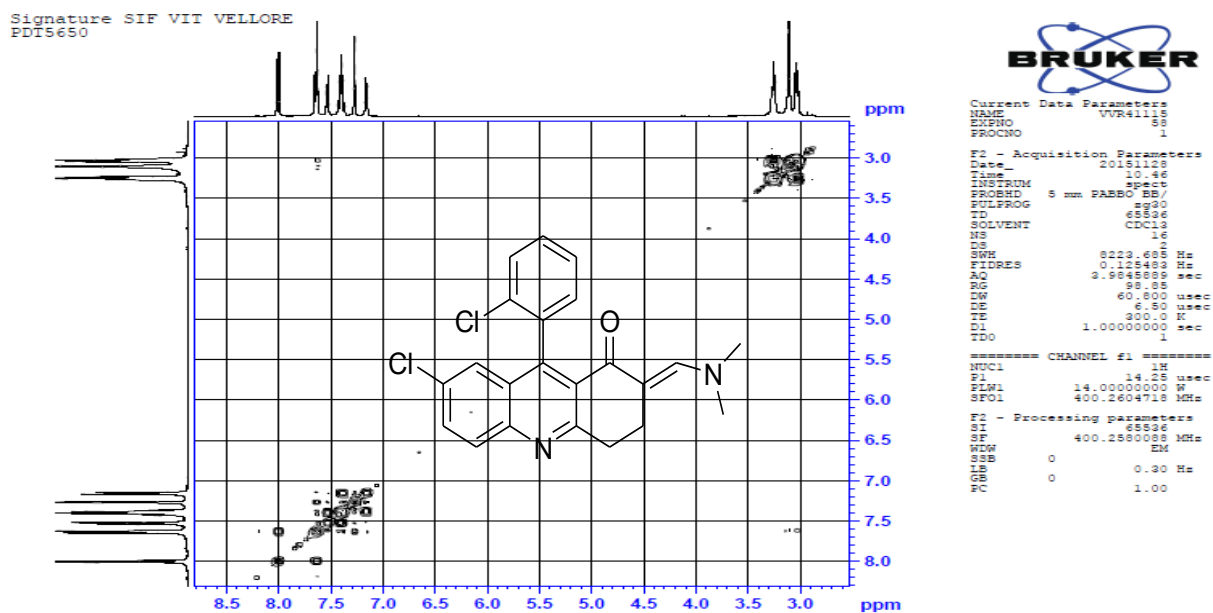

Figure 38: H-H COSY spectrum of (E)-7-chloro-9-(2-chlorophenyl)-2-((dimethylamino)methylene)-3,4-dihydroacridin-1(2H)-one (3c):

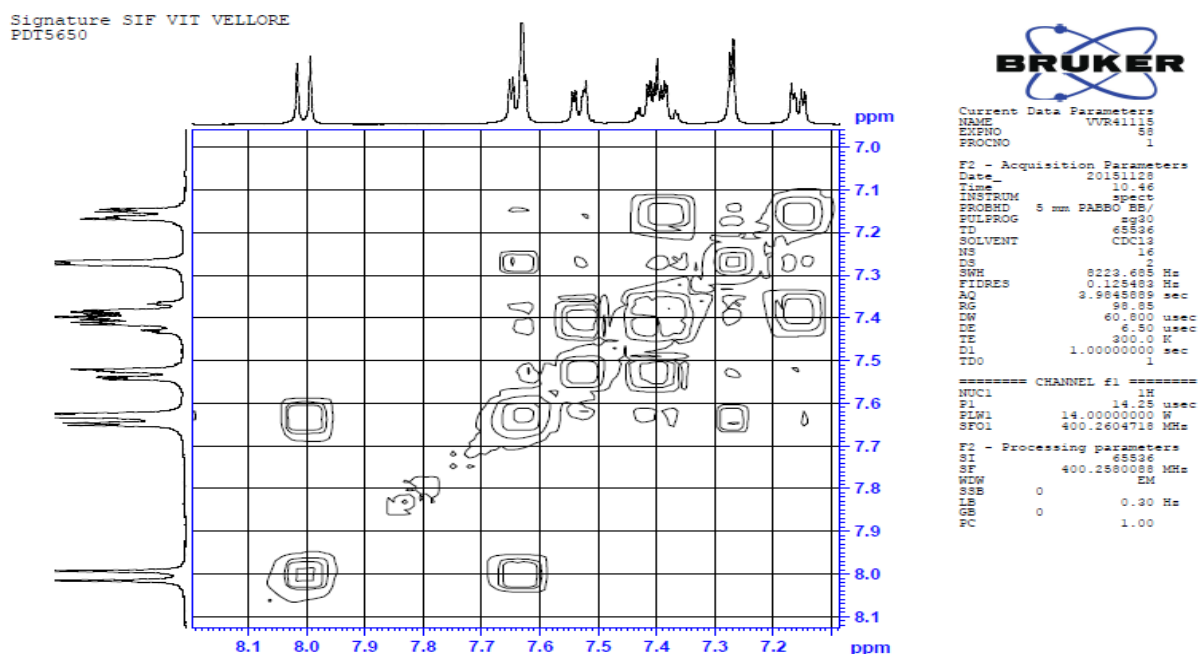

Figure 39: Enlarged H-H COSY spectrum of (E)-7-chloro-9-(2-chlorophenyl)-2-((dimethylamino)methylene)-3,4-dihydroacridin-1(2H)-one (3c):

Signature SIF VIT VELLORE  
PDS650

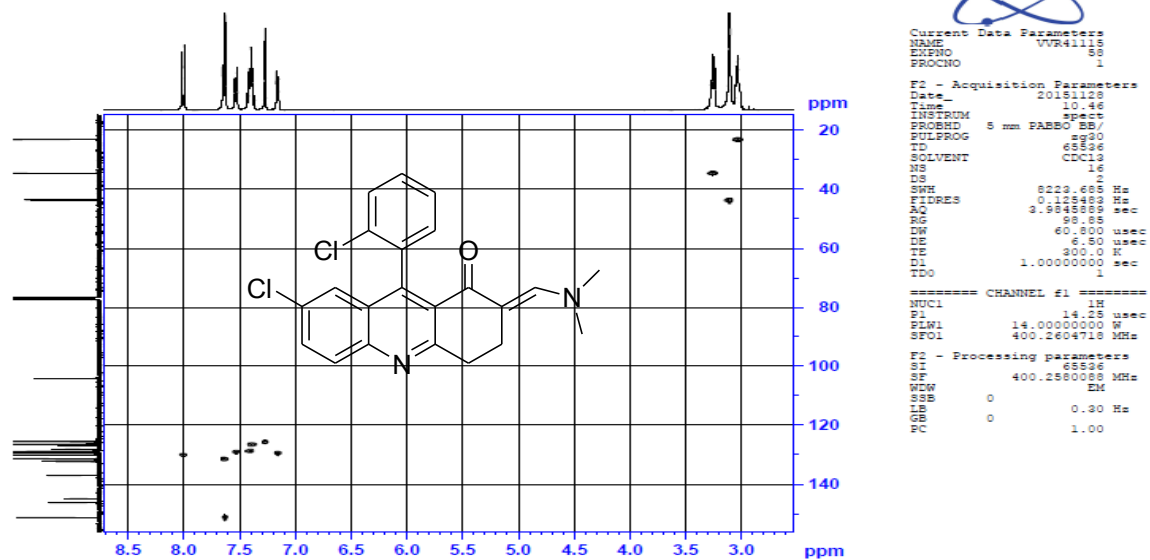

Figure 40: HSQC spectrum of *(E)*-7-chloro-9-(2-chlorophenyl)-2-((dimethylamino)methylene)-3,4-dihydroacridin-1(2H)-one (3c):

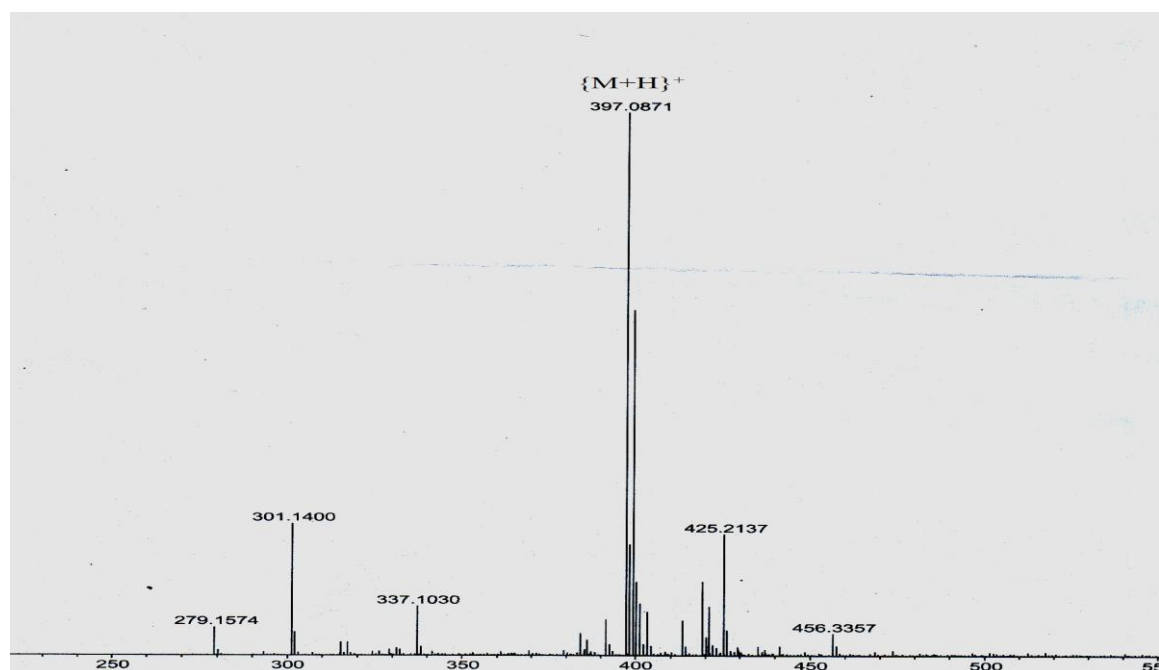

Figure 41: HRMS of *(E)*-7-chloro-9-(2-chlorophenyl)-2-((dimethylamino)methylene)-3,4-dihydroacridin-1(2H)-one(3c):

Signature SIF VIT VELLORE  
265H

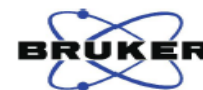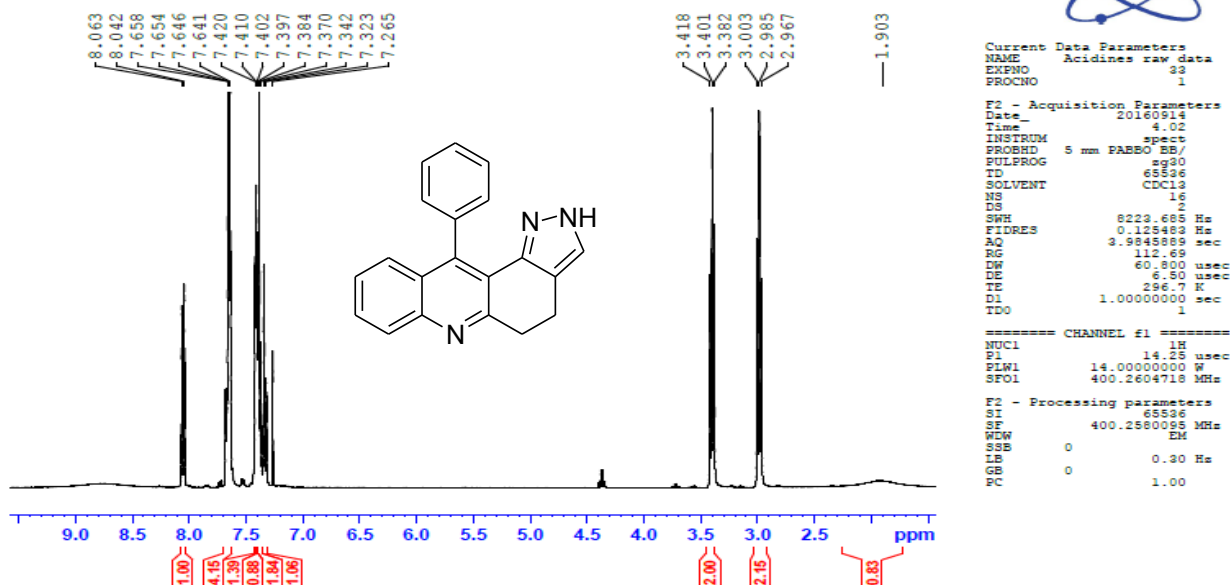

Figure 42:  $^1\text{H}$  NMR spectrum of 4,5-dihydro-11-phenyl-2H-pyrazolo[3,4-a]acridine (4a):

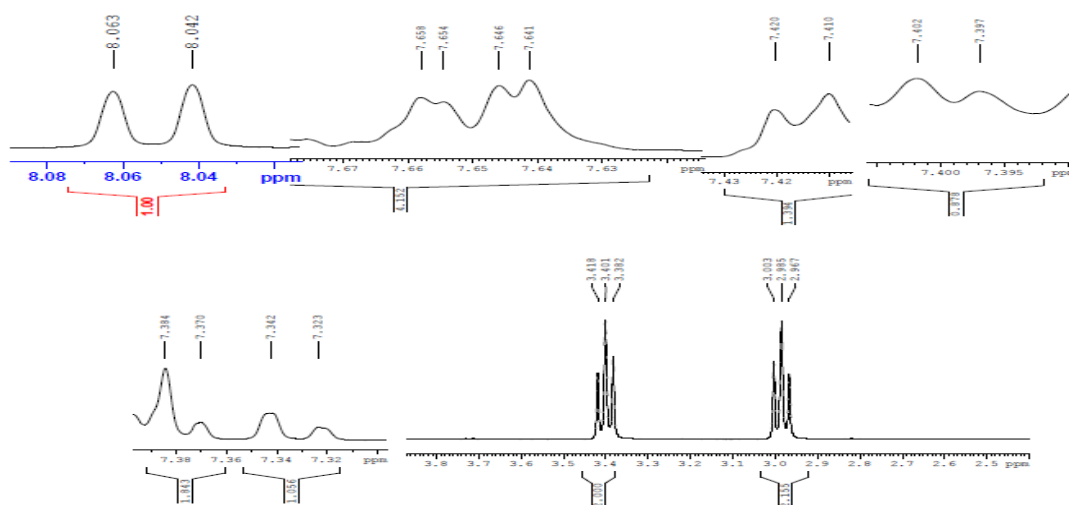

Figure 43: Enlarged  $^1\text{H}$  NMR spectrum of 4,5-dihydro-11-phenyl-2H-pyrazolo[3,4-a]Acridine (4a):

Signature SIF VIT VELLORE  
265N

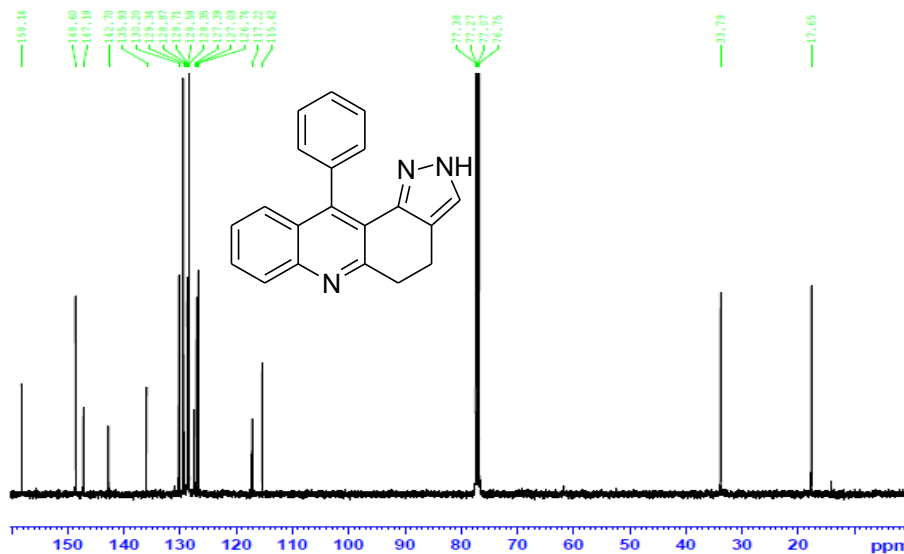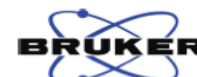

Current Data Parameters  
NAME Dr.VVR120516  
EXPNO 230  
PROCNO 1

F2 - Acquisition Parameters  
Date\_ 20160910  
Time 19:22  
INSTRUM spect  
PROBHD 5 mm F4BBO BB/  
PULPROG zgpg30  
TD 65536  
SOLVENT CDCl3  
NS 512  
DS 4  
SWH 24038.40 Hz  
FIDRES 0.3667888 Hz  
AQ 1.3631488 sec  
RG 127.76  
DW 20.000 usec  
DE 6.500 usec  
TE 298.2 K  
D1 2.00000000 sec  
D2 0.03000000 sec  
D3 0.03000000 sec

===== CHANNEL f1 =====  
NUC1 13C  
P1 9.80 usec  
PL1 58.00000000 W  
SFO1 100.6261192 MHz

===== CHANNEL f2 =====  
CPDPRG2 waltz16  
NUC2 1H  
PCPD2 90.00 usec  
PL2 14.00000000 W  
PLM2 0.35097000 W  
PLM3 0.3543899 W  
SFO2 400.2536010 MHz

F2 - Processing parameters  
SI 32768  
SF 100.6449540 MHz  
WDW EM  
SSB 0  
LB 1.00 Hz  
GB 0  
PC 1.40

Figure 44:  $^{13}\text{C}$  NMR spectrum of 4,5-dihydro-11-phenyl-2H-pyrazolo[3,4-a]acridine (4a):

Signature SIF VIT VELLORE  
265H

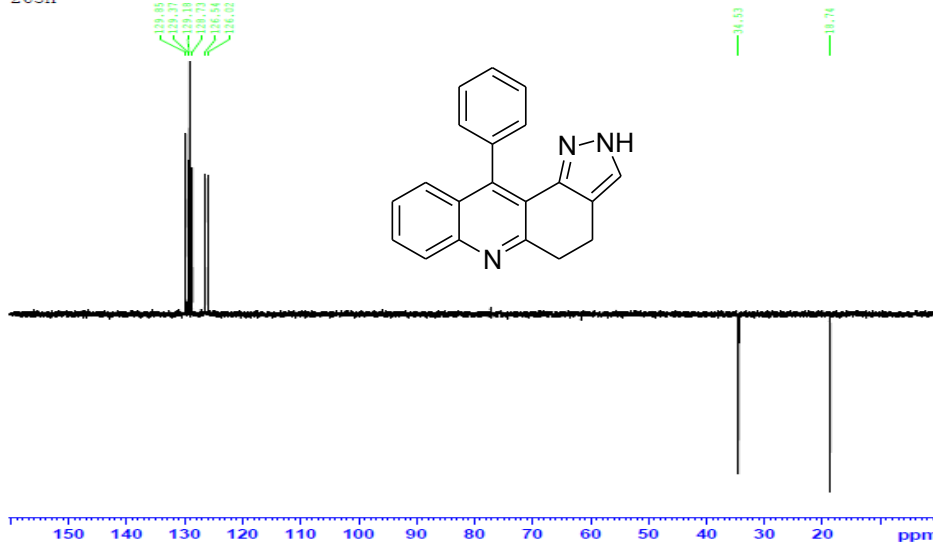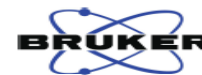

Current Data Parameters  
NAME VIT 100 Aug 2016 omoroda  
EXPNO 36  
PROCNO 1

F2 - Acquisition Parameters  
Date\_ 20160914  
Time 4:41  
INSTRUM spect  
PROBHD 5 mm F4BBO BB/  
PULPROG zgpg135  
TD 65536  
SOLVENT CDCl3  
NS 512  
DS 4  
SWH 16129.033 Hz  
FIDRES 0.245110 Hz  
AQ 2.0316160 sec  
RG 199.5  
DW 31.000 usec  
DE 6.500 usec  
TE 297.2 K  
D1 145.0000000 sec  
D2 2.00000000 sec  
D3 0.0344828 sec  
D12 0.00000000 sec  
D13 0.00000000 sec  
D14 0.00000000 sec

===== CHANNEL f1 =====  
NUC1 13C  
P1 9.80 usec  
PL1 58.00000000 W  
PLM1 0.35097000 W  
SFO1 100.6261192 MHz

===== CHANNEL f2 =====  
CPDPRG2 waltz16  
NUC2 1H  
PCPD2 90.00 usec  
PL2 14.00000000 W  
PLM2 0.35097000 W  
PLM3 0.3543899 W  
SFO2 400.2536010 MHz

F2 - Processing parameters  
SI 32768  
SF 100.6449540 MHz  
WDW EM  
SSB 0  
LB 1.00 Hz  
GB 0  
PC 1.40

Figure 45: DEPT-135 spectrum of 4,5-dihydro-11-phenyl-2H-pyrazolo[3,4-a]acridine (4a):

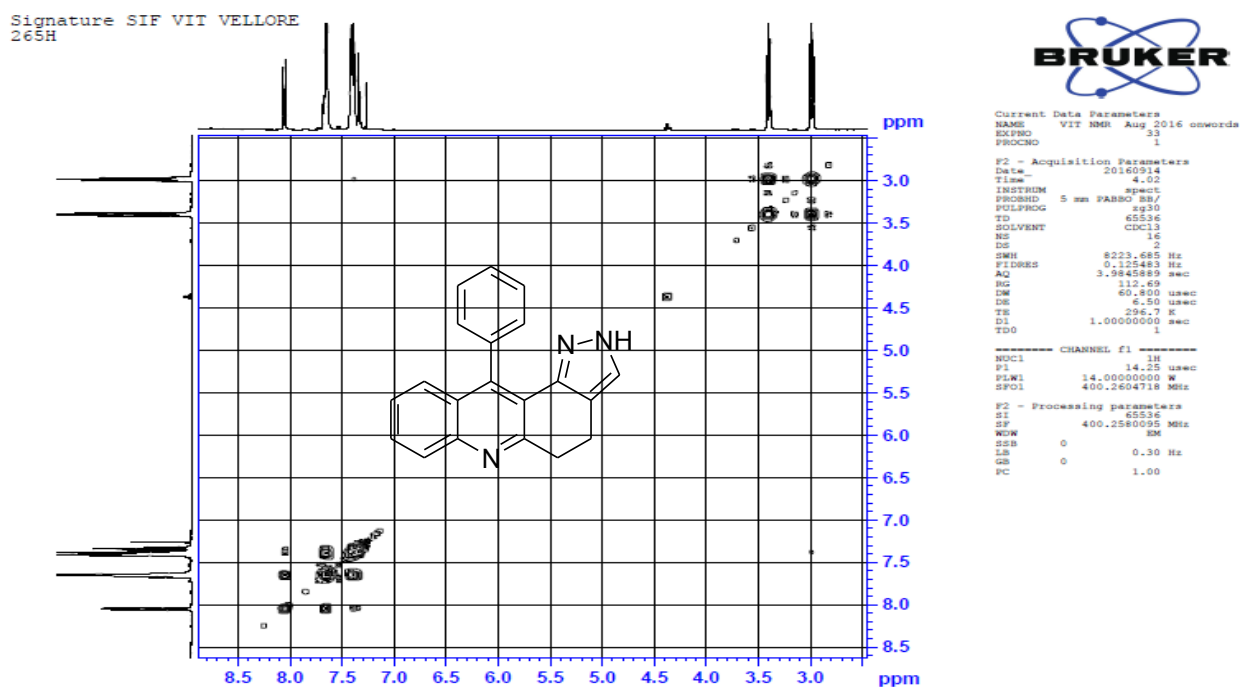

Figure 46: H-H COSY spectrum of 4,5-dihydro-11-phenyl-2H-pyrazolo[3,4-a]acridine (4a):

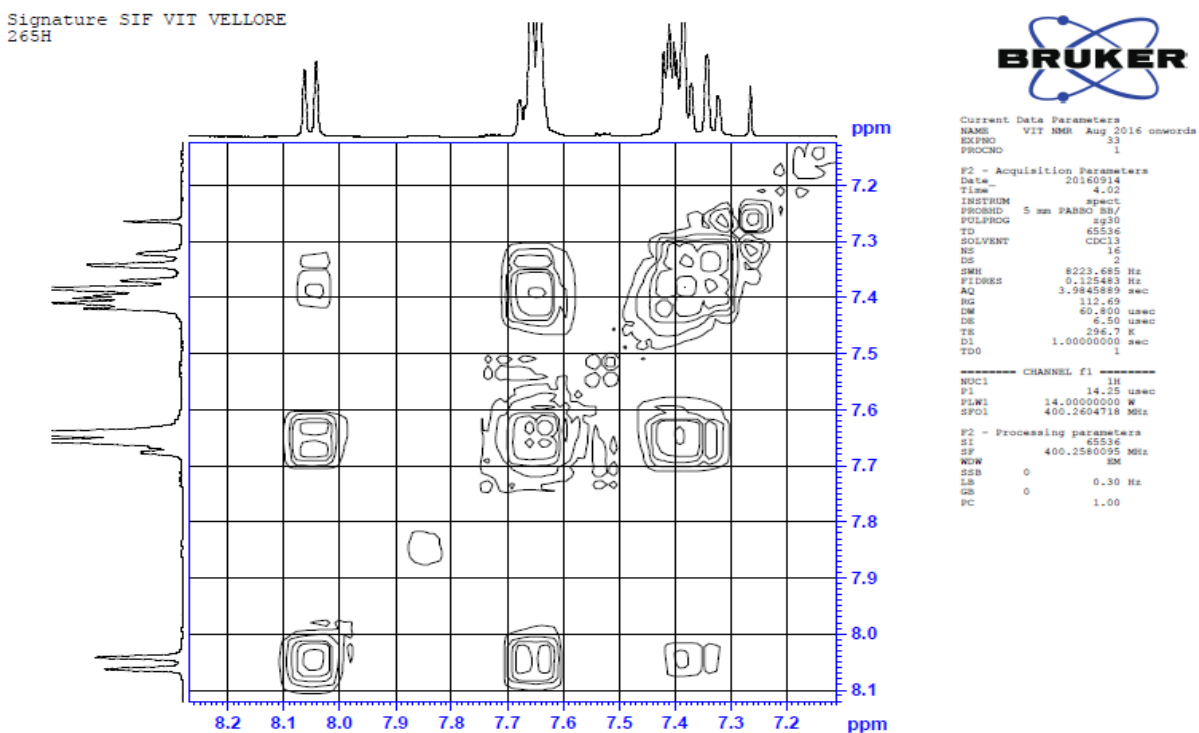

Figure 47: Enlarged H-H COSY spectrum of 4,5-dihydro-11-phenyl-2H-pyrazolo[3,4-a]acridine (4a):



Signature SIF VIT VELLORE  
265H

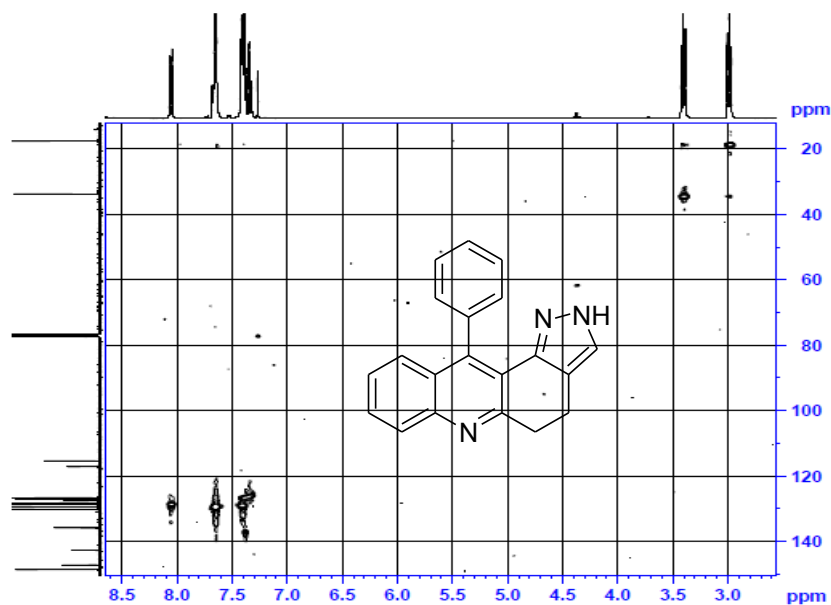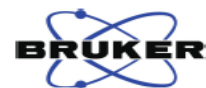

Current Data Parameters  
NAME VIT NMR Aug 2016 onwards  
EXPNO 33  
PROCNO 1

F2 - Acquisition Parameters  
Date\_ 20160914  
Time 4.02  
INSTRUM spect  
PROBHD 5 mm PABBO BB/  
PULPROG zg30  
TD 65536  
SOLVENT CDCl3  
NS 16  
DS 2  
SWH 8223.685 Hz  
FIDRES 0.125483 Hz  
AQ 3.9845889 sec  
RG 112.69  
DM 60.800 usec  
DE 6.50 usec  
TE 296.7 K  
D1 1.00000000 sec  
TDO 1

----- CHANNEL f1 -----  
NUC1 13  
P1 14.25 usec  
PLW1 14.00000000 W  
SFO1 400.2604718 MHz  
F2 - Processing parameters  
SI 65536  
SF 400.2580095 MHz  
WDW EM  
SSB 0  
LB 0.30 Hz  
GB 0  
PC 1.00

Figure 48: HSQC spectrum of 4,5-dihydro-11-phenyl-2H-pyrazolo[3,4-a]acridine (4a):

Signature SIF VIT VELLORE  
265H

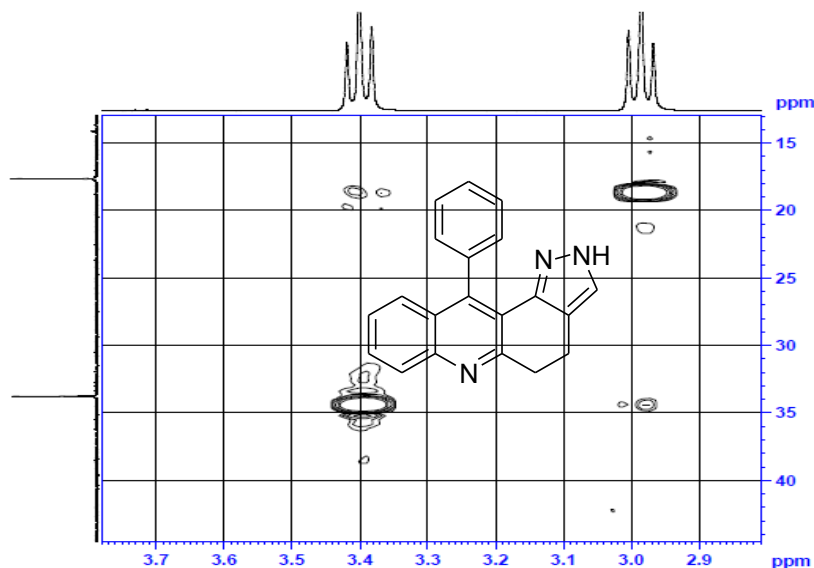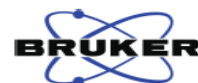

Current Data Parameters  
NAME VIT NMR Aug 2016 onwards  
EXPNO 33  
PROCNO 1

F2 - Acquisition Parameters  
Date\_ 20160914  
Time 4.02  
INSTRUM spect  
PROBHD 5 mm PABBO BB/  
PULPROG zg30  
TD 65536  
SOLVENT CDCl3  
NS 16  
DS 2  
SWH 8223.685 Hz  
FIDRES 0.125483 Hz  
AQ 3.9845889 sec  
RG 112.69  
DM 60.800 usec  
DE 6.50 usec  
TE 296.7 K  
D1 1.00000000 sec  
TDO 1

----- CHANNEL f1 -----  
NUC1 13  
P1 14.25 usec  
PLW1 14.00000000 W  
SFO1 400.2604718 MHz  
F2 - Processing parameters  
SI 65536  
SF 400.2580095 MHz  
WDW EM  
SSB 0  
LB 0.30 Hz  
GB 0  
PC 1.00

Figure 49: Enlarged HSQC spectrum of 4,5-dihydro-11-phenyl-2H-pyrazolo[3,4-a]acridine (4a):

Signature SIF VIT VELLORE  
265H

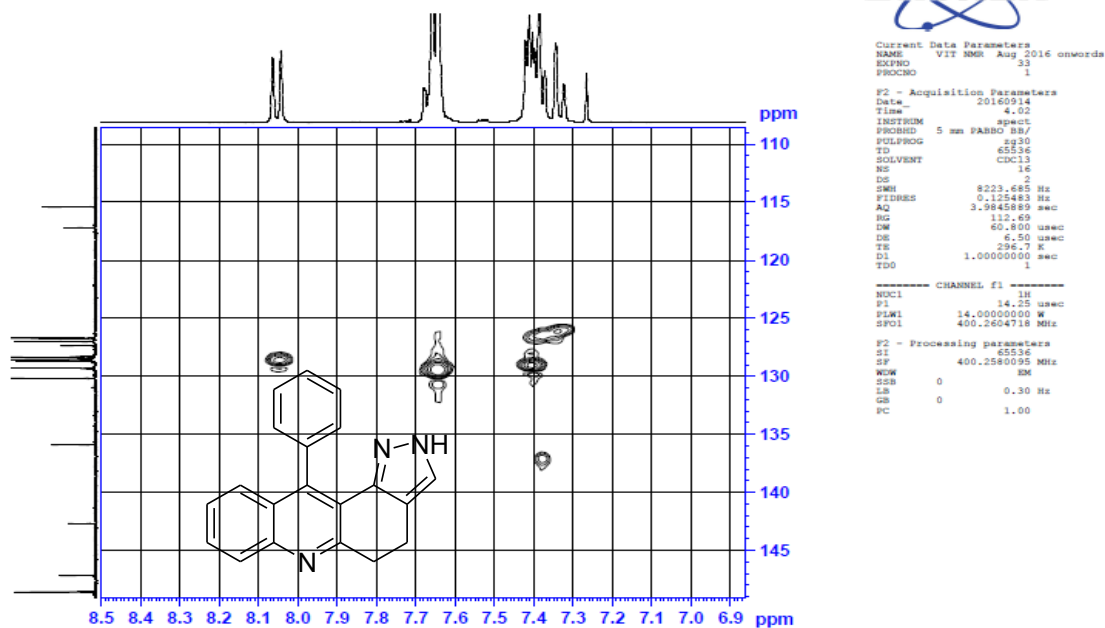

Figure 50: Enlarged HSQC spectrum of 4,5-dihydro-11-phenyl-2H-pyrazolo[3,4-a]acridine (4a):

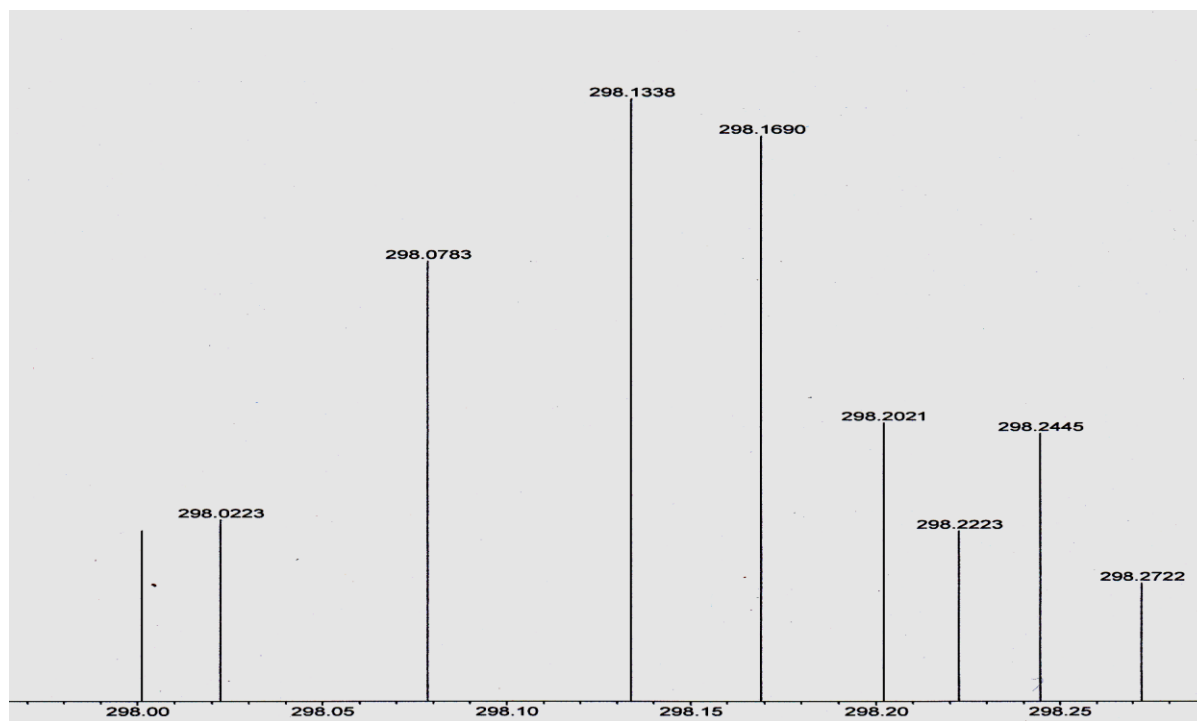

Figure 51: HRMS of 4,5-dihydro-11-phenyl-2H-pyrazolo[3,4-a]acridine (4a):

Signature SIF VIT VELLORE  
5650HYD

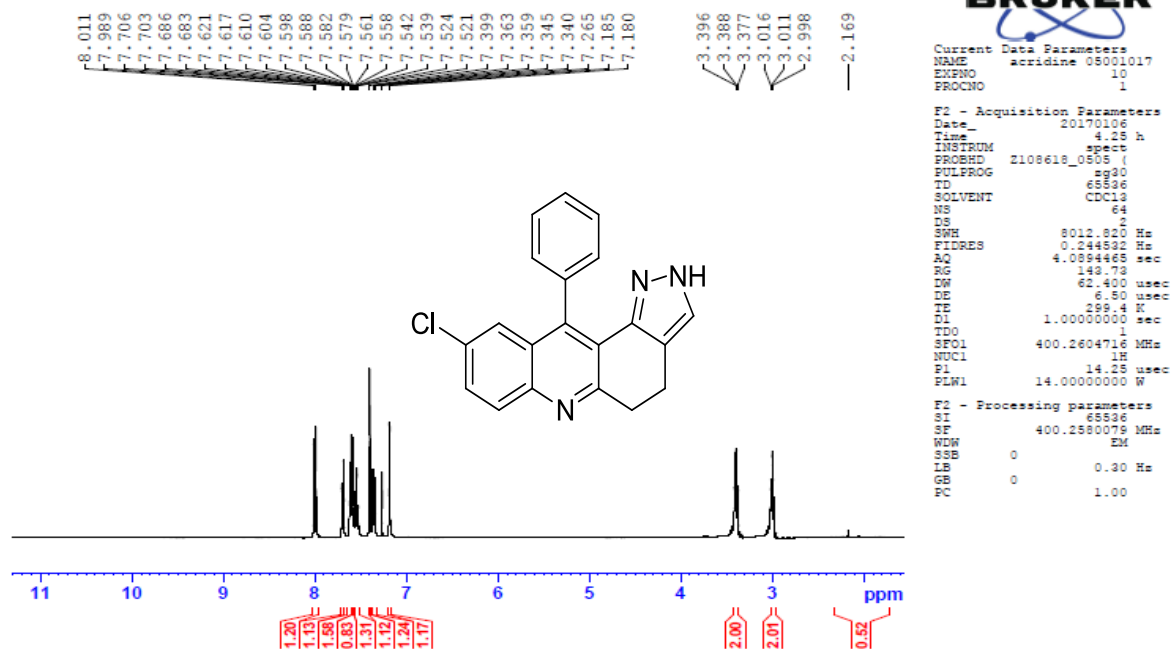

Figure 52:  $^1\text{H}$  NMR spectrum of 9-chloro-4,5-dihydro-11-phenyl-1H-pyrazolo[3,4-a]acridine (4b):

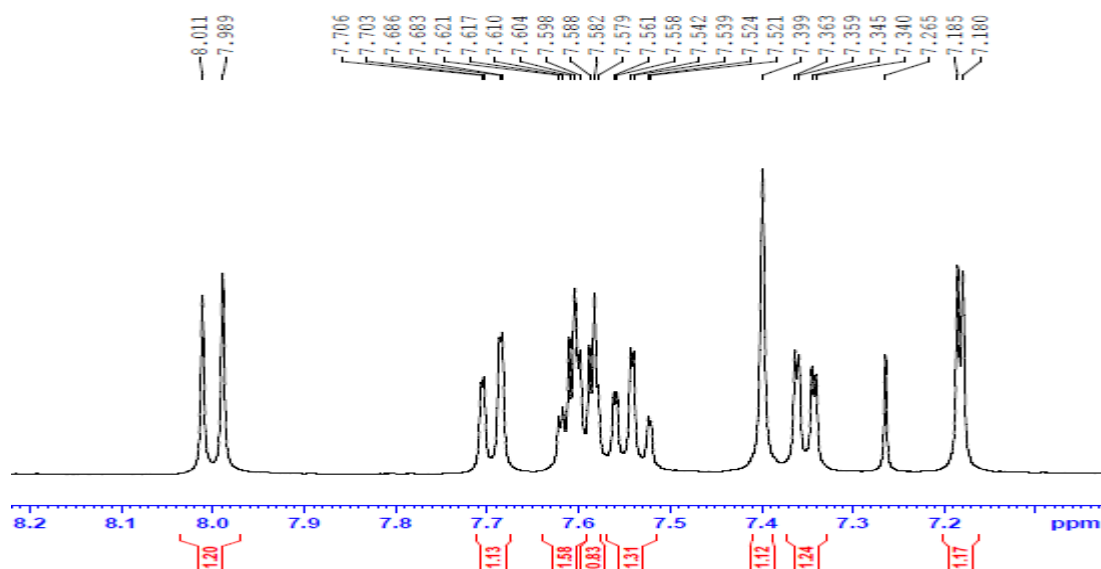

Figure 53: Enlarged  $^1\text{H}$  NMR spectrum of 9-chloro-4,5-dihydro-11-phenyl-1H-pyrazolo[3,4-a]acridine (4b):

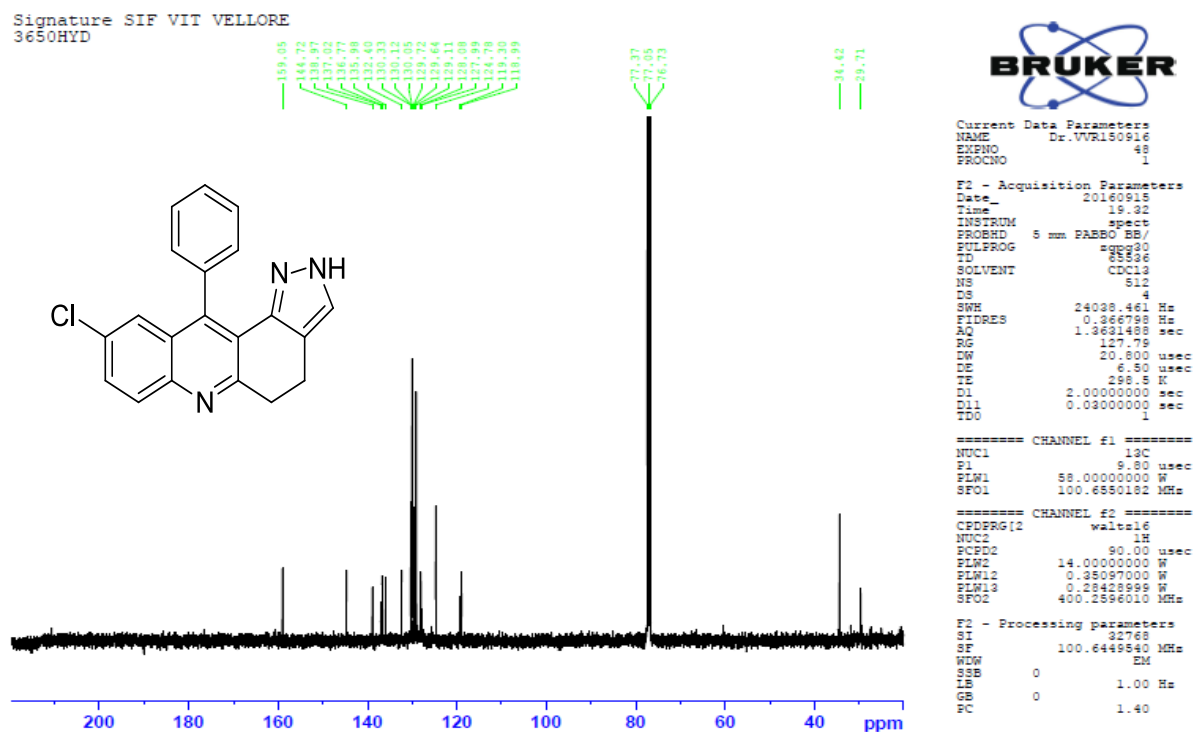Figure 54:  $^{13}\text{C}$  NMR spectrum of 9-chloro-4,5-dihydro-11-phenyl-1H-pyrazolo[3,4-a]acridine (4b):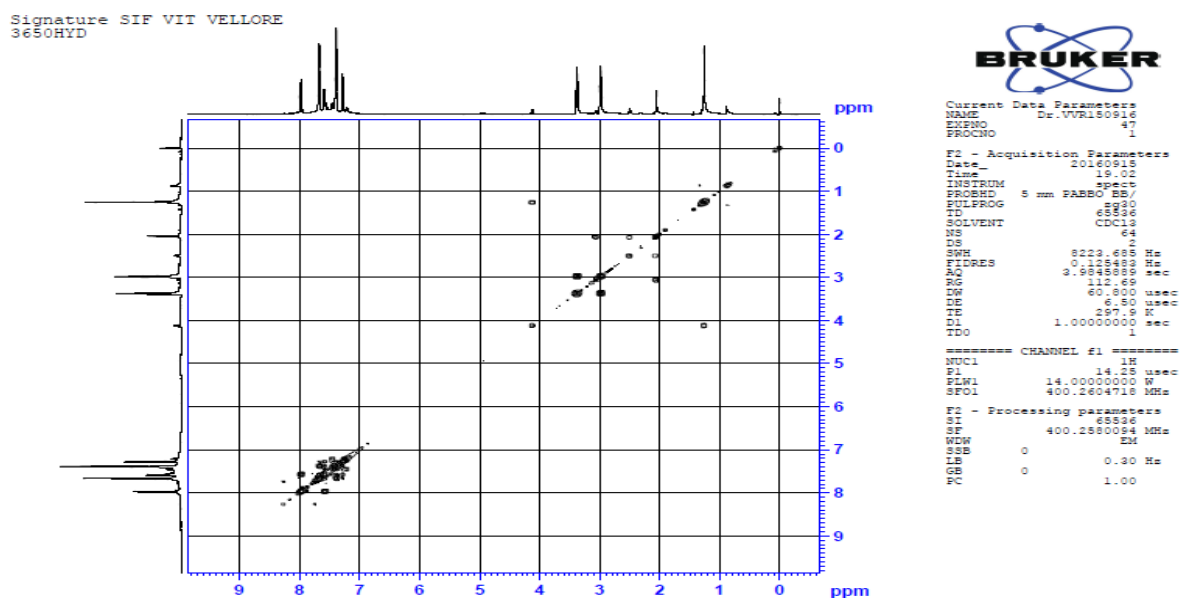

Figure 55: H-H COSY spectrum of 9-chloro-4,5-dihydro-11-phenyl-1H-pyrazolo[3,4-a]acridine (4b):

Signature SIF VIT VELLORE  
3650HYD

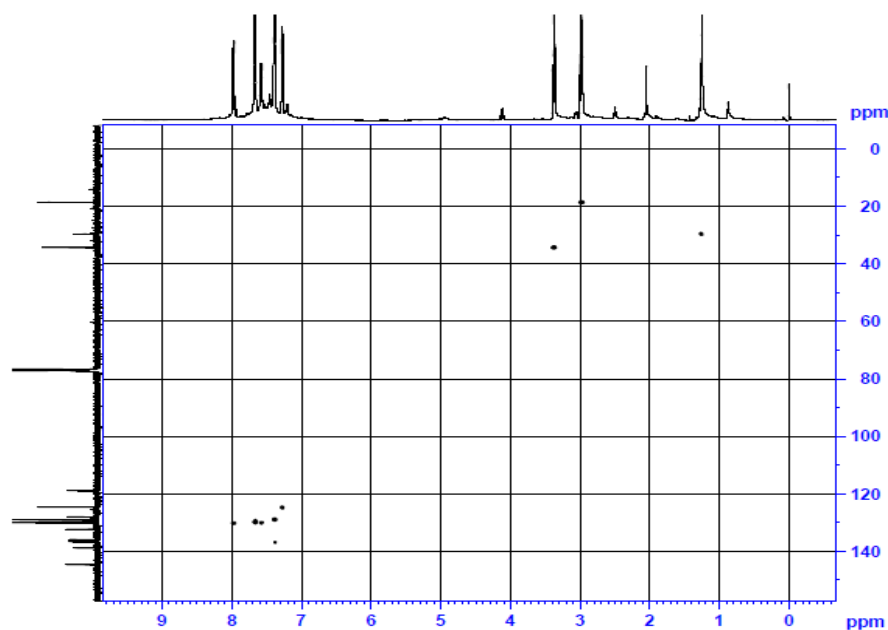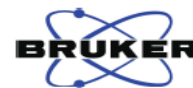

Current Data Parameters  
NAME Dr.VVR150916  
EXPNO 47  
PROCNO 1

F2 - Acquisition Parameters  
Date\_ 20160916  
Time 19.02  
INSTRUM spect  
PROBHD 5 mm PABBO BB/  
PULPROG zgpg30  
TD 65536  
SOLVENT CDCl3  
NS 64  
DS 2  
SWH 8223.688 Hz  
FIDRES 0.125492 Hz  
AQ 3.9845889 sec  
RG 112.69  
DW 60.800 usec  
DE 6.50 usec  
TE 297.9 K  
D1 1.0000000 sec  
TD0 1

===== CHANNEL f1 =====  
NUC1 1H  
P1 14.25 usec  
PLW1 14.00000000 W  
SFO1 400.2604718 MHz

F2 - Processing parameters  
SI 65536  
SF 400.2580054 MHz  
WDW EM  
SSB 0  
LB 0.30 Hz  
GB 0  
PC 1.00

Figure 56: HSQC spectrum of 9-chloro-4,5-dihydro-11-phenyl-1H-pyrazolo[3,4-a]acridine (4b):

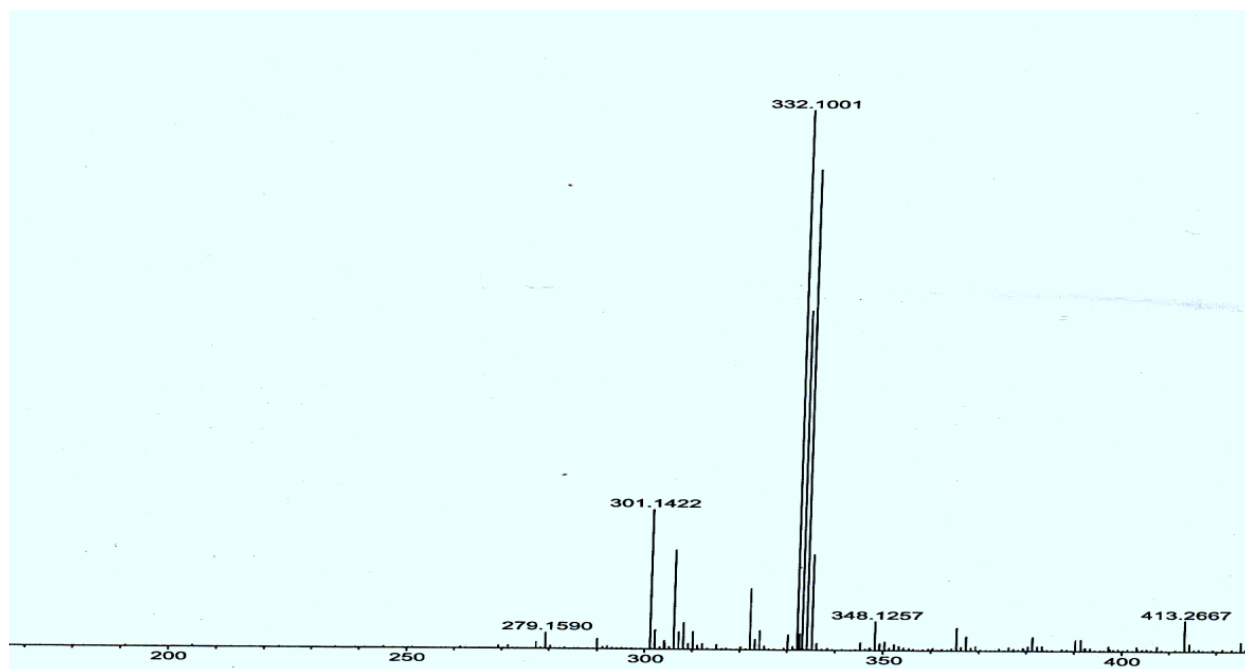

Figure 57: HRMS of 9-chloro-4,5-dihydro-11-phenyl-1H-pyrazolo[3,4-a]acridine (4b):

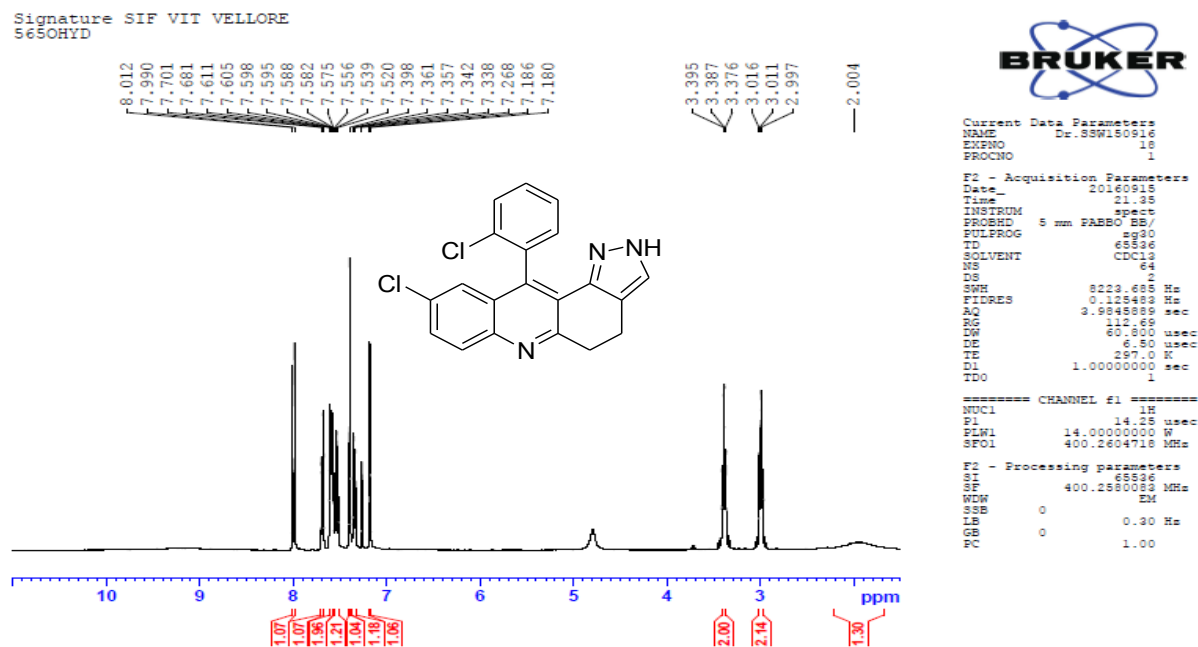

Figure 58:  $^1\text{H}$  NMR spectrum of 9-chloro-11-(2-chlorophenyl)-4,5-dihydro-1H-pyrazolo[3,4-a]acridine (4c):

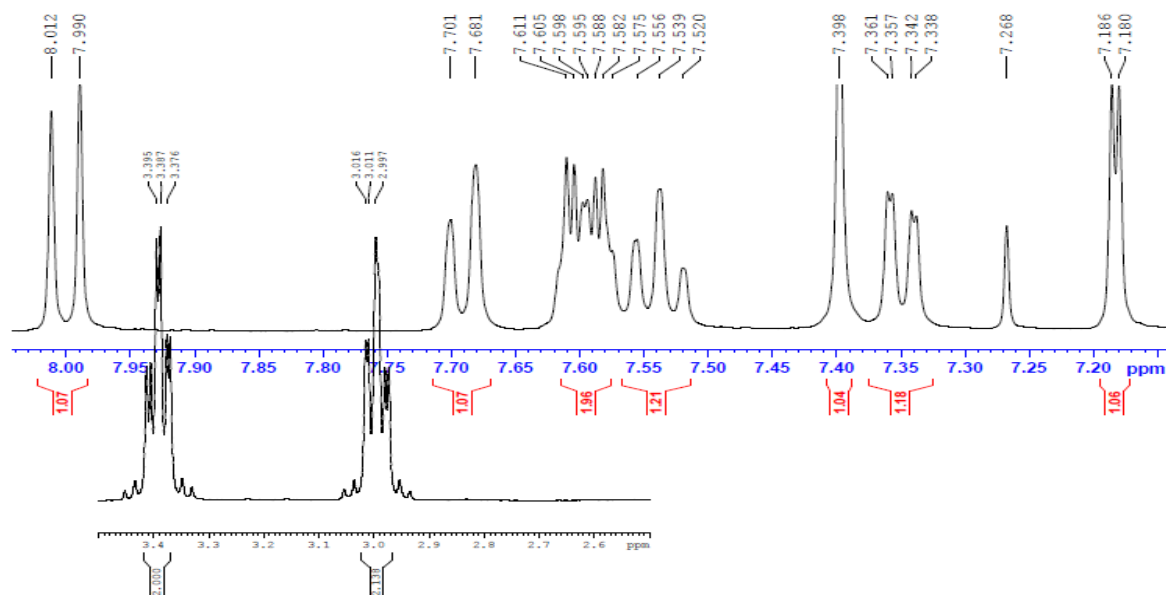

Figure 59: Enlarged  $^1\text{H}$  NMR spectrum of 9-chloro-11-(2-chlorophenyl)-4,5-dihydro-1H-pyrazolo[3,4-a]acridine (4c):

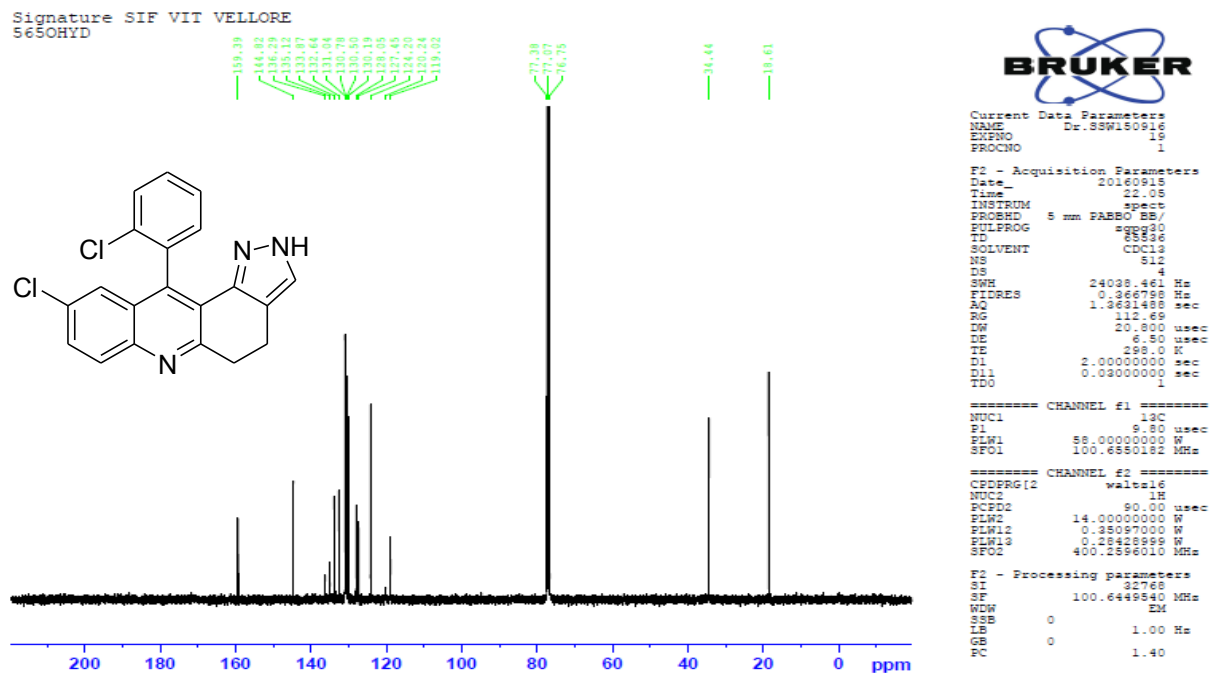Figure 60:  $^{13}\text{C}$  NMR of 9-chloro-11-(2-chlorophenyl)-4,5-dihydro-1H-pyrazolo[3,4-a]acridine (4c):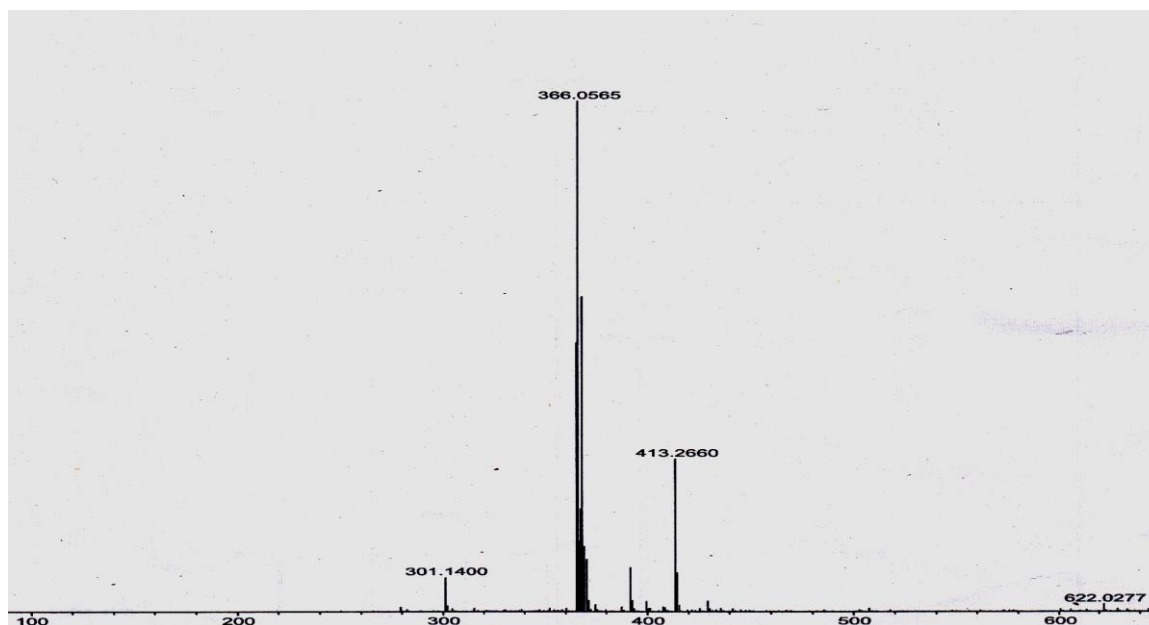

Figure 61: HRMS of 9-chloro-11-(2-chlorophenyl)-4,5-dihydro-1H-pyrazolo[3,4-a]acridine (4c):

Signature SIF VIT VELLORE  
265N

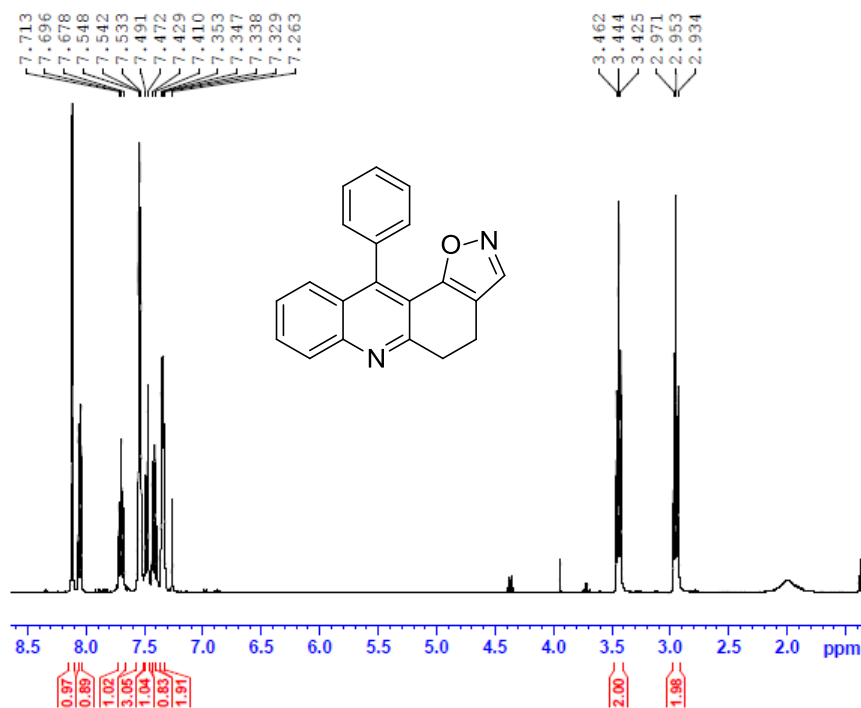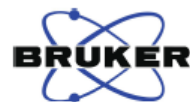

Current Data Parameters  
NAME 37  
EXPNO 38  
PROCNO 1

F2 - Acquisition Parameters  
Date\_ 20160914  
Time 4.48  
INSTRUM spect  
PROBHD 5 mm PABBO BB/  
PULPROG zgpg30  
TD 65536  
SOLVENT CDCl3  
NS 16  
DS 2  
SWH 8223.685 Hz  
FIDRES 0.125483 Hz  
AQ 3.9845889 sec  
RG 95.85  
DQ 60.800 usec  
DE 6.50 usec  
TE 296.8 K  
D1 1.00000000 sec  
TDO 1

===== CHANNEL f1 =====  
NUC1 1H  
P1 14.28 usec  
PLW1 14.00000000 W  
SFO1 400.2604718 MHz

F2 - Processing parameters  
SI 65536  
SF 400.2580105 MHz  
WDW EM  
SSB 0  
LB 0 0.30 Hz  
GB 0  
PC 1.00

Figure 62:  $^1\text{H}$  NMR spectrum of 4,5-dihydro-11-phenylisoxazolo[5,4-a]acridine (5a):

Signature SIF VIT VELLORE  
265N

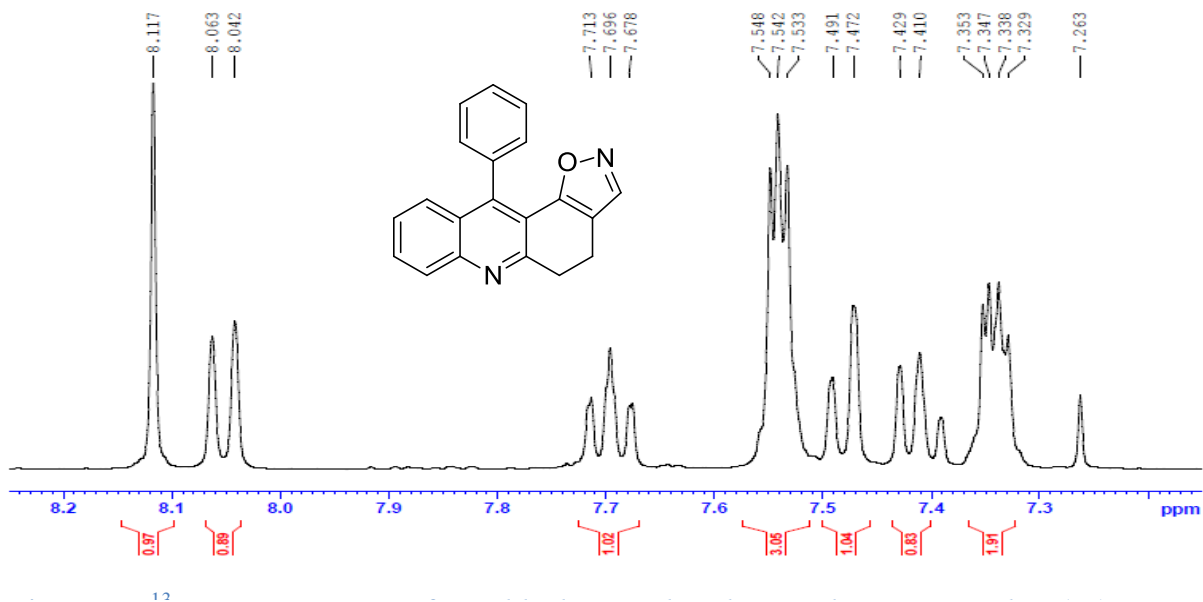

Figure 63: Enlarged  $^1\text{H}$  NMR spectrum of 4,5-dihydro-11-phenylisoxazolo[5,4-a]acridine (5a):



Signature SIF VIT VELLORE  
265N

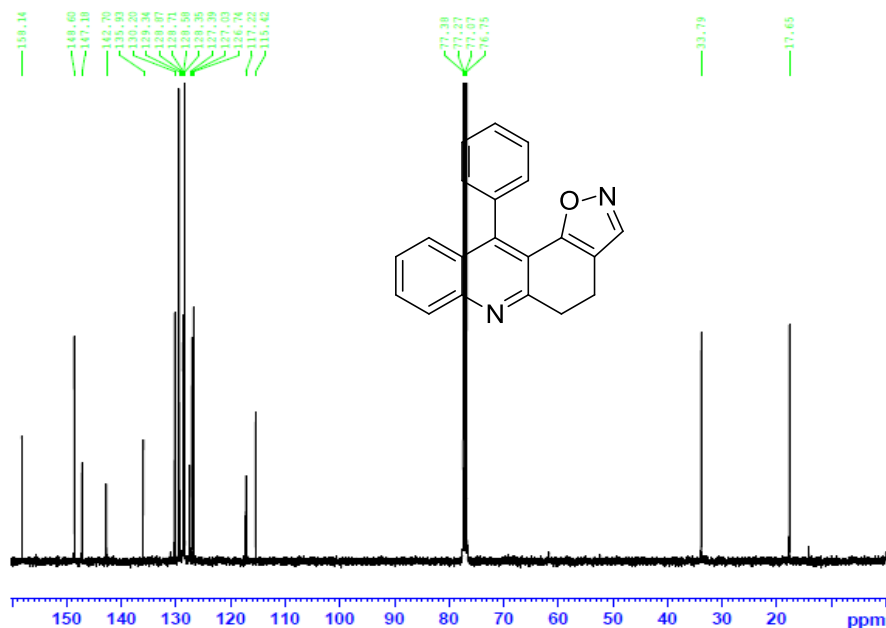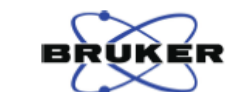

Current Data Parameters  
NAME Dr.VVR120916  
EXPNO 2  
PROCNO 1

F2 - Acquisition Parameters  
Date\_ 20160812  
Time 19.28  
INSTRUM spect  
PROBHD 5 mm PABBO BB/  
PULPROG zgpg30  
TD 65536  
SOLVENT CDCl3  
NS 612  
DS 4  
SWH 24038.461 Hz  
FIDRES 0.366798 Hz  
AQ 1.861188 sec  
RG 127.79  
DW 20.800 usec  
DE 6.50 usec  
TE 298.2 K  
D1 2.00000000 sec  
D11 0.03000000 sec  
TDO

===== CHANNEL #1 =====  
NUC1 13C  
P1 9.80 usec  
PLW1 58.00000000 W  
SFO1 100.6250182 MHz  
===== CHANNEL #2 =====  
CPDPRG2 waltz16  
NUC2 1H  
PCPD2 80.00 usec  
P4 28.50 usec  
PLW2 14.00000000 W  
PLW12 0.38097000 W  
PLW13 0.28428999 W  
SFO2 400.255010 MHz

F2 - Processing parameters  
SI 32768  
SF 100.6449540 MHz  
WDW EM  
SSB 0  
LB 1.00 Hz  
GB 0  
PC 1.40

Figure 64:  $^{13}\text{C}$  NMR spectrum of 4,5-dihydro-11-phenylisoxazolo[5,4-a]acridine (5a):

Signature SIF VIT VELLORE  
265N

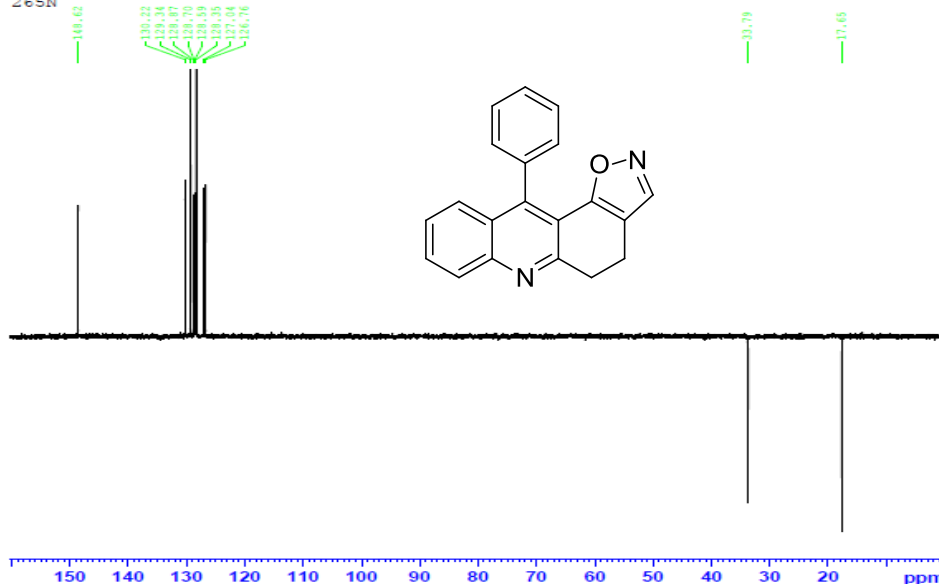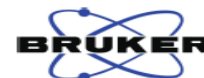

Current Data Parameters  
NAME VIT NMR Aug 2016 onwards  
EXPNO 41  
PROCNO 1

F2 - Acquisition Parameters  
Date\_ 20160914  
Time 5.27  
INSTRUM spect  
PROBHD 5 mm PABBO BB/  
PULPROG zgpg30  
TD 65536  
SOLVENT CDCl3  
NS 256  
DS 4  
SWH 16129.032 Hz  
FIDRES 0.246110 Hz  
AQ 2.0316160 sec  
RG 199.6  
DW 31.000 usec  
DE 6.50 usec  
TE 297.3 K  
CPDPRG2 waltz16  
NUC1 13C  
P1 9.80 usec  
PLW1 58.00000000 W  
SFO1 100.6250182 MHz  
SFOAL5 Cmp60comp 4  
SFOAL5 0.500  
SFOAL5 8.51080036 W

===== CHANNEL #1 =====  
NUC1 13C  
P1 9.80 usec  
PLW1 58.00000000 W  
SFO1 100.6250182 MHz  
===== CHANNEL #2 =====  
CPDPRG2 waltz16  
NUC2 1H  
P2 14.25 usec  
P4 28.50 usec  
PCPD2 80.00 usec  
PLW2 14.00000000 W  
PLW12 0.38097000 W  
PLW13 0.28428999 W  
SFO2 400.255010 MHz

F2 - Processing parameters  
SI 32768  
SF 100.6449540 MHz  
WDW EM  
SSB 0  
LB 1.00 Hz  
GB 0  
PC 1.40

Figure 65: DEPT-135 spectrum of 4,5-dihydro-11-phenylisoxazolo[5,4-a]acridine (5a):

Signature SIF VIT VELLORE  
265N

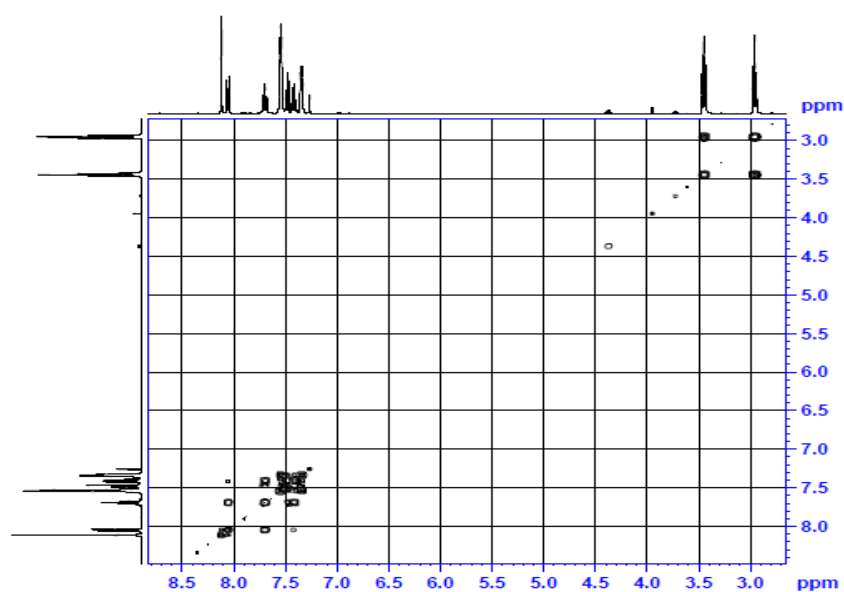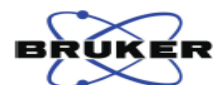

Current Data Parameters  
NAME VVR40916  
EXPNO 38  
PROCNO 1

F2 - Acquisition Parameters  
Date\_ 20160914  
Time 4.48  
INSTRUM spect  
PROBHD 5 mm FAPBO BB/  
PULPROG zg30  
TD 65536  
SOLVENT CDCl3  
NS 1.6  
DS  
SWH 8223.688 Hz  
FIDRES 0.123483 Hz  
AQ 3.934637 sec  
RG 99.66  
DW 60.800 usec  
DE 6.50 usec  
TE 296.2 K  
D1 1.00000000 sec  
TD0 1

===== CHANNEL f1 =====  
NUC1 1H  
P1 14.25 usec  
PLW1 14.00000000 W  
SFO1 400.2604718 MHz

F2 - Processing parameters  
SFO2 400.2580105 MHz  
WDW EM  
SSB 0  
GB 0  
PC 0.30 Hz  
PR 1.00

Figure 66: H-H COSY spectrum of 4,5-dihydro-11-phenylisoxazolo[5,4-a]acridine (5a):

Signature SIF VIT VELLORE  
265N

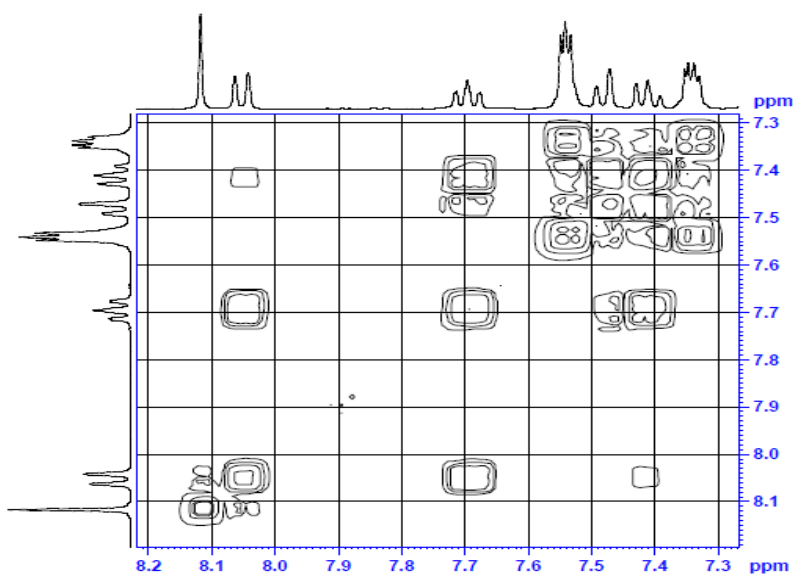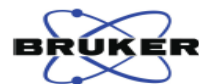

Current Data Parameters  
NAME VVR40916  
EXPNO 38  
PROCNO 1

F2 - Acquisition Parameters  
Date\_ 20160914  
Time 4.48  
INSTRUM spect  
PROBHD 5 mm FAPBO BB/  
PULPROG zg30  
TD 65536  
SOLVENT CDCl3  
NS 1.6  
DS  
SWH 8223.688 Hz  
FIDRES 0.123483 Hz  
AQ 3.934637 sec  
RG 99.66  
DW 60.800 usec  
DE 6.50 usec  
TE 296.2 K  
D1 1.00000000 sec  
TD0 1

===== CHANNEL f1 =====  
NUC1 1H  
P1 14.25 usec  
PLW1 14.00000000 W  
SFO1 400.2604718 MHz

F2 - Processing parameters  
SFO2 400.2580105 MHz  
WDW EM  
SSB 0  
GB 0  
PC 0.30 Hz  
PR 1.00

Figure 67: Enlarged H-H COSY spectrum of 4,5-dihydro-11-phenylisoxazolo[5,4-a]Acridine (5a):

Signature SIF VIT VELLORE  
265N

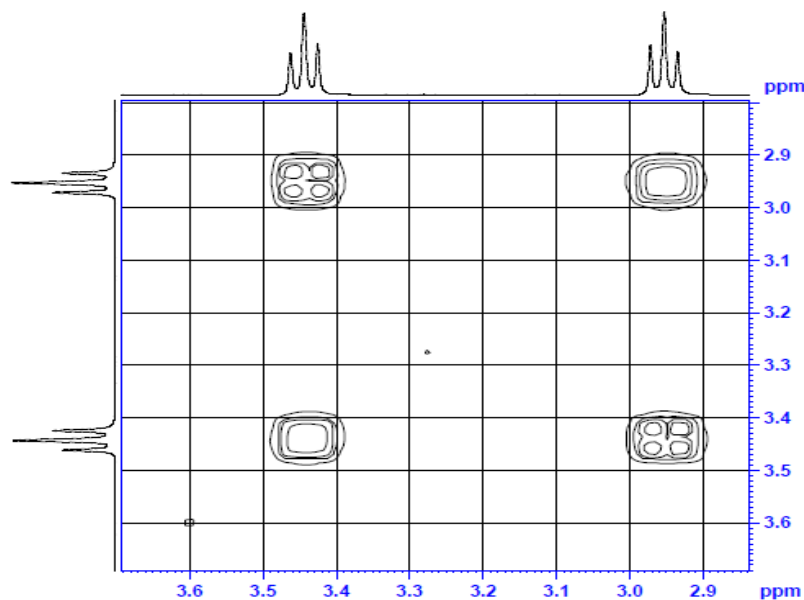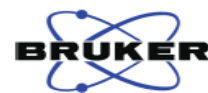

Current Data Parameters  
NAME VVR40916  
EXPNO 2  
PROCNO 1

F2 - Acquisition Parameters  
Date\_ 20160916  
Time 4.48  
INSTRUM spect  
PROBHD 5 mm PABBO BB/  
PULPROG zgpg30  
TD 65536  
SOLVENT CDCl3  
NS 16  
DS 2  
SWH 8223.688 Hz  
FIDRES 0.123483 Hz  
AQ 3.984687 sec  
RG 98.88  
DW 60.800 usec  
DE 6.50 usec  
TE 297.0 K  
D1 1.00000000 sec  
TDO 1

===== CHANNEL f1 =====  
NUC1 1H  
P1 14.35 usec  
PLW1 14.00000000 W  
SF01 400.2604718 MHz

F2 - Processing parameters  
SI 65536  
SF 400.2580105 MHz  
WDW EM  
SSB 0  
LB 0.30 Hz  
GB 0  
FC 1.00  
FI

Figure 68: Enlarged H-H COSY spectrum of 4,5-dihydro-11-phenylisoxazolo[5,4-a]Acridine (5a):

Signature SIF VIT VELLORE  
565OHYD

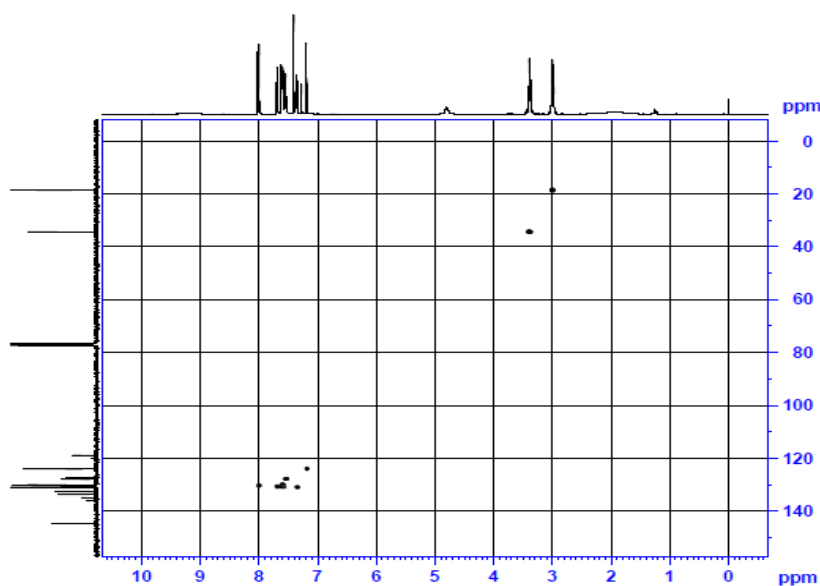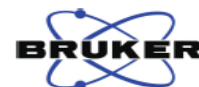

Current Data Parameters  
NAME Dr.SSW180916  
EXPNO 18  
PROCNO 1

F2 - Acquisition Parameters  
Date\_ 20160916  
Time 21.35  
INSTRUM spect  
PROBHD 5 mm PABBO BB/  
PULPROG zgpg30  
TD 65536  
SOLVENT CDCl3  
NS 64  
DS 2  
SWH 8223.688 Hz  
FIDRES 0.123483 Hz  
AQ 3.984687 sec  
RG 112.65  
DW 60.800 usec  
DE 6.50 usec  
TE 297.0 K  
D1 1.00000000 sec  
TDO 1

===== CHANNEL f1 =====  
NUC1 1H  
P1 14.35 usec  
PLW1 14.00000000 W  
SF01 400.2604718 MHz

F2 - Processing parameters  
SI 65536  
SF 400.2580105 MHz  
WDW EM  
SSB 0  
LB 0.30 Hz  
GB 0  
FC 1.00  
FI

Figure 69: HSQC spectrum of 4,5-dihydro-11-phenylisoxazolo[5,4-a]acridine (5a):

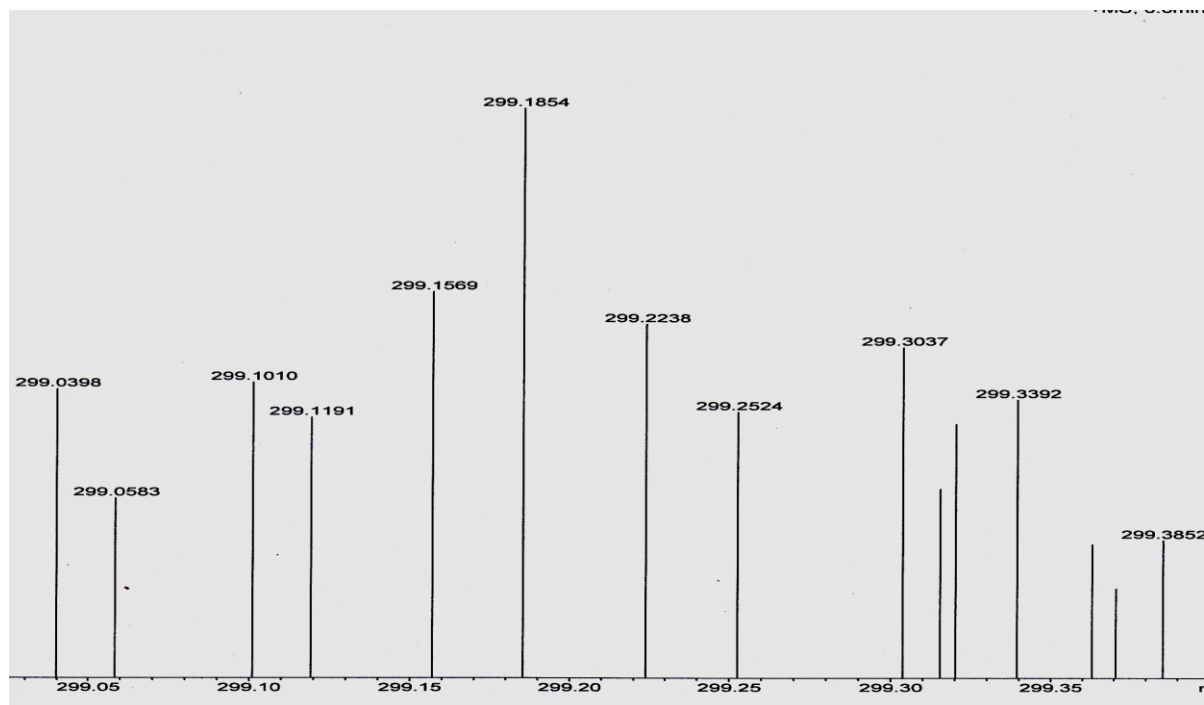

Figure 70: HRMS of 4,5-dihydro-11-phenylisoxazolo[5,4-a]acridine (5a):

Signature SIF VIT VELLORE  
365ONO

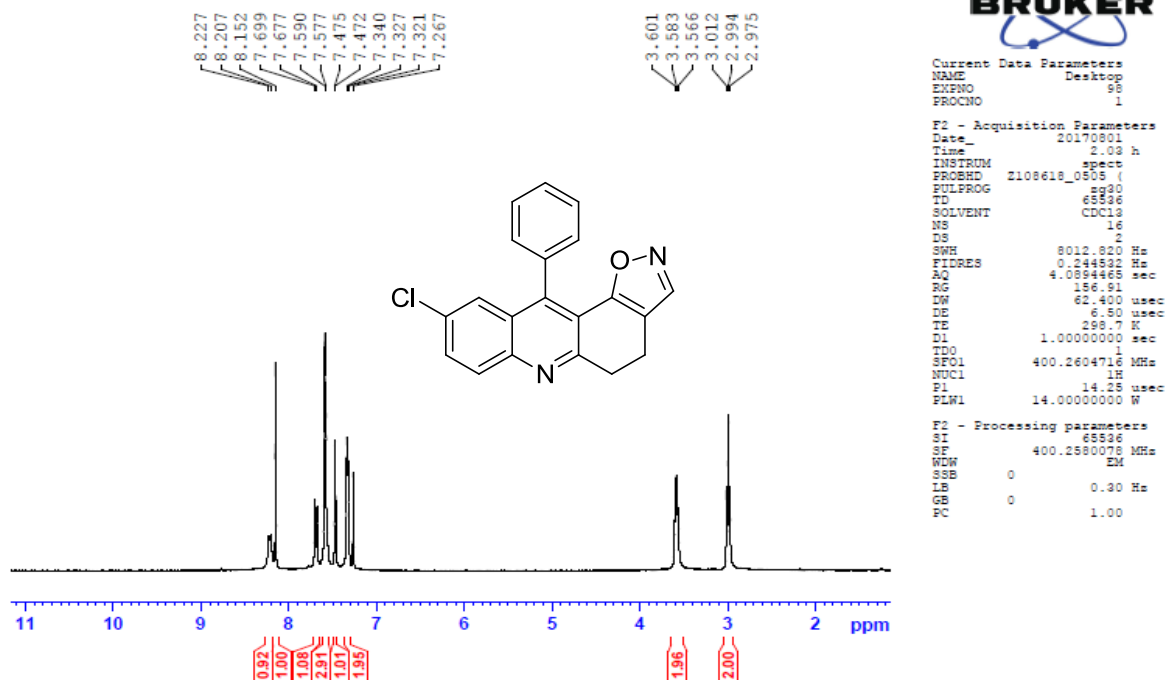

Figure 71:  $^1\text{H}$  NMR spectrum of 9-chloro-4,5-dihydro-11-phenylisoxazolo[3,4-a]acridine (5b):

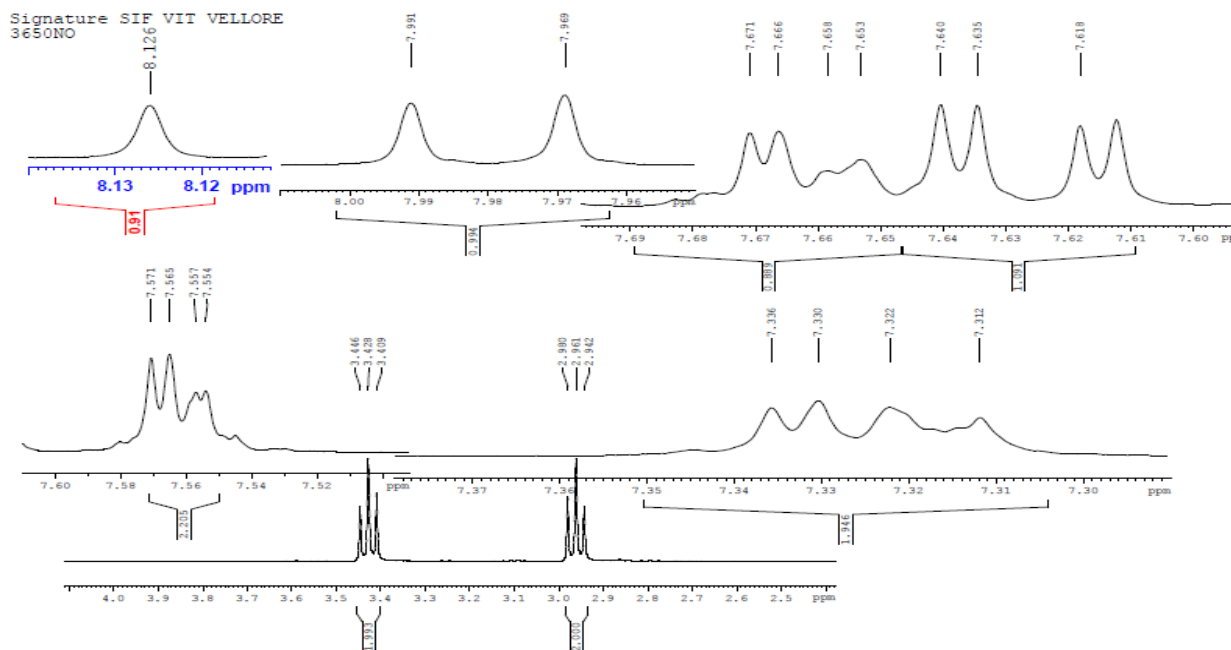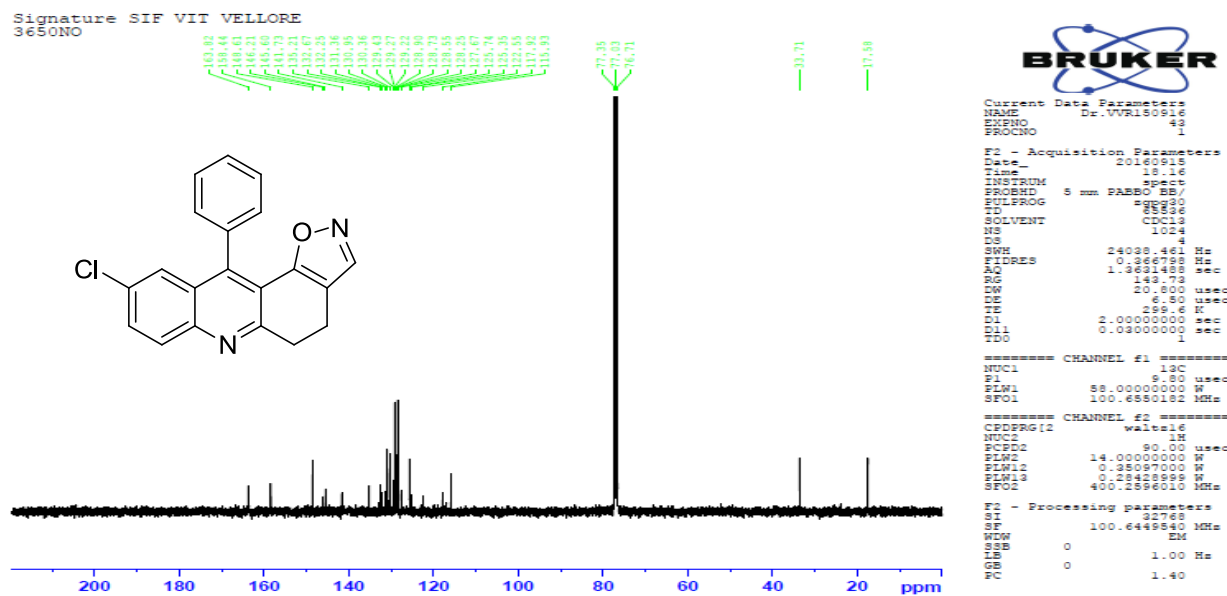

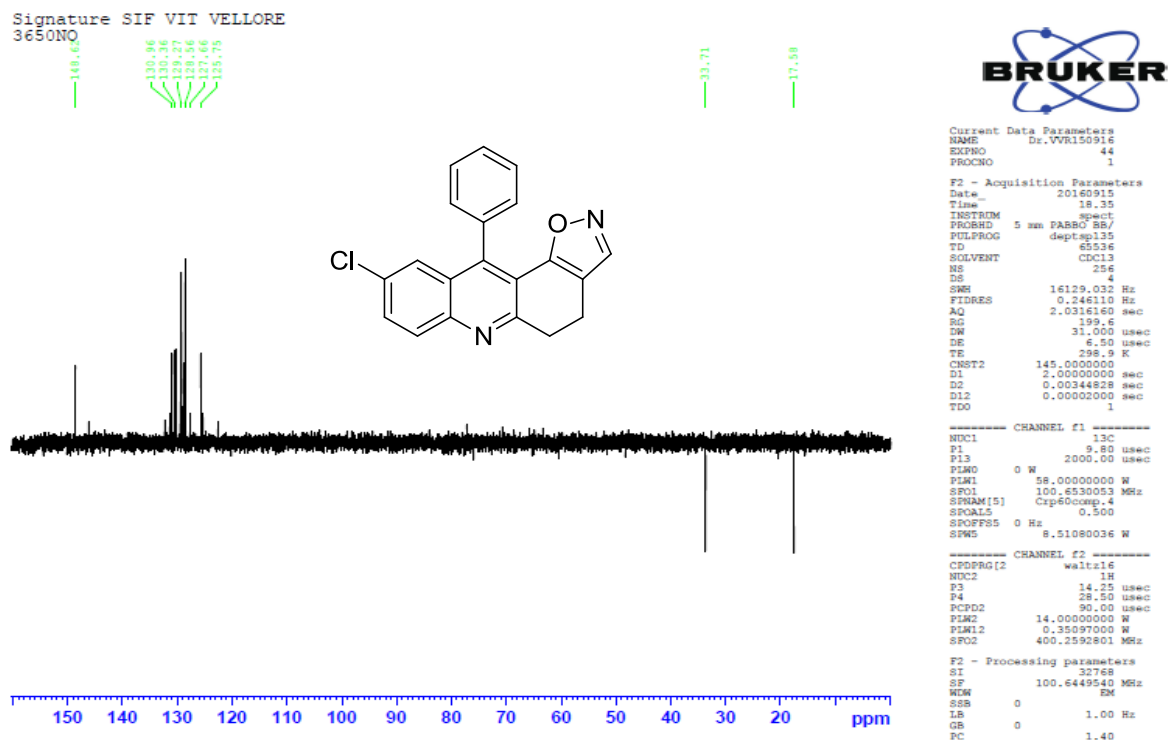

Figure 74: DEPT-135 spectrum of 9-chloro-4,5-dihydro-11-phenylisoxazolo[3,4-a]acridine (5b):

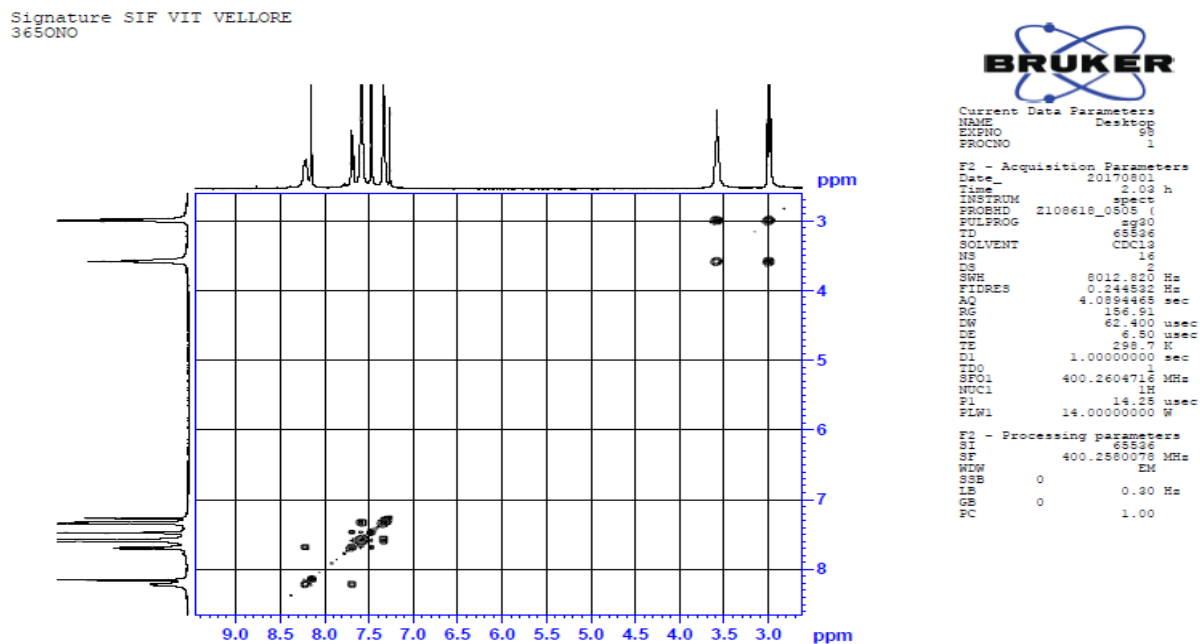

Figure 75: Enlarged H-H COSY spectrum of 9-chloro-4,5-dihydro-11-phenylisoxazolo[3,4-a]acridine (5b):

Signature SIF VIT VELLORE  
3650NO

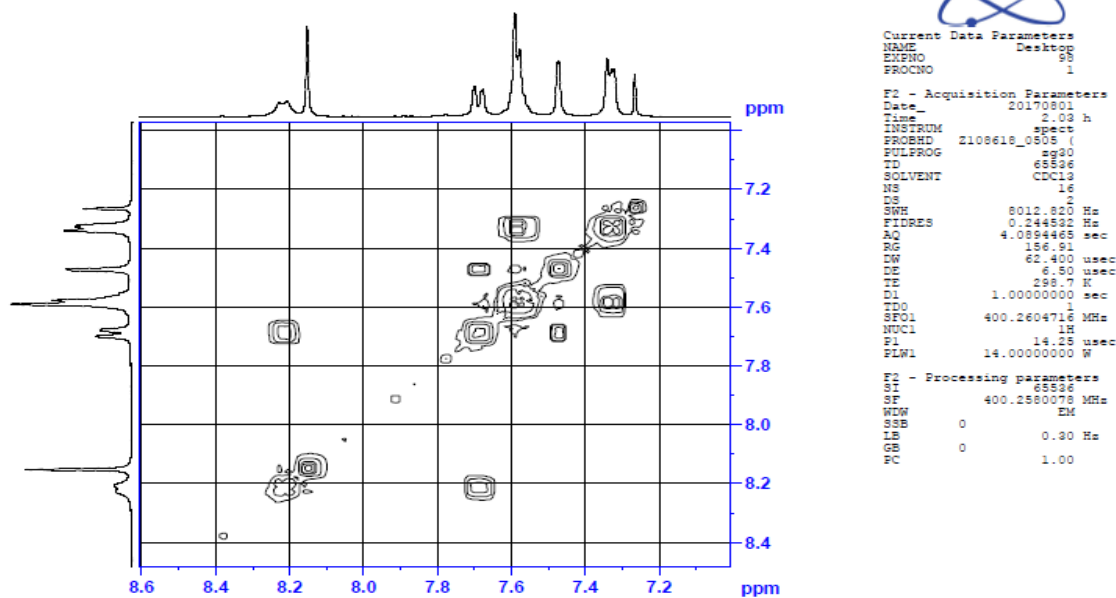

Figure 76: Enlarged H-H COSY spectrum of 9-chloro-4,5-dihydro-11-phenylisoxazolo[3,4-a]acridine (5b):

Signature SIF VIT VELLORE  
3650NO

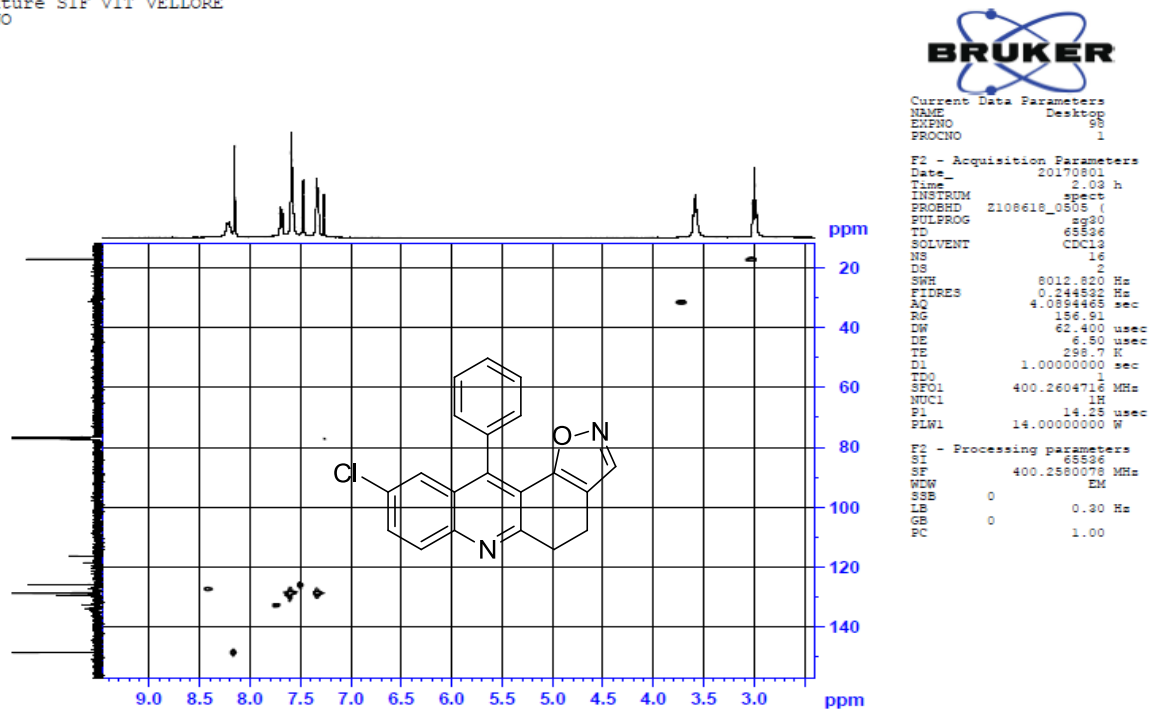

Figure 77: HSQC spectrum of 9-chloro-4,5-dihydro-11-phenylisoxazolo[3,4-a]acridine (5b):

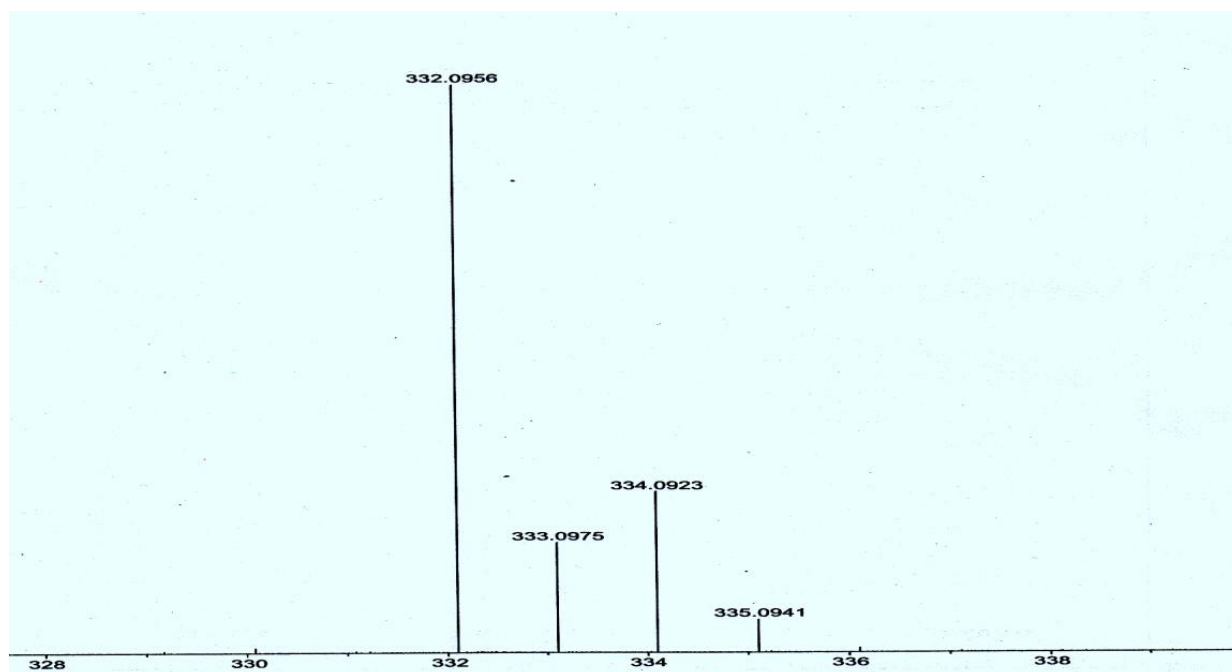

Figure 78: HRMS of 9-chloro-4,5-dihydro-11-phenylisoxazolo[3,4-a]acridine (5b):

Signature SIF VIT VELLORE  
3650NO

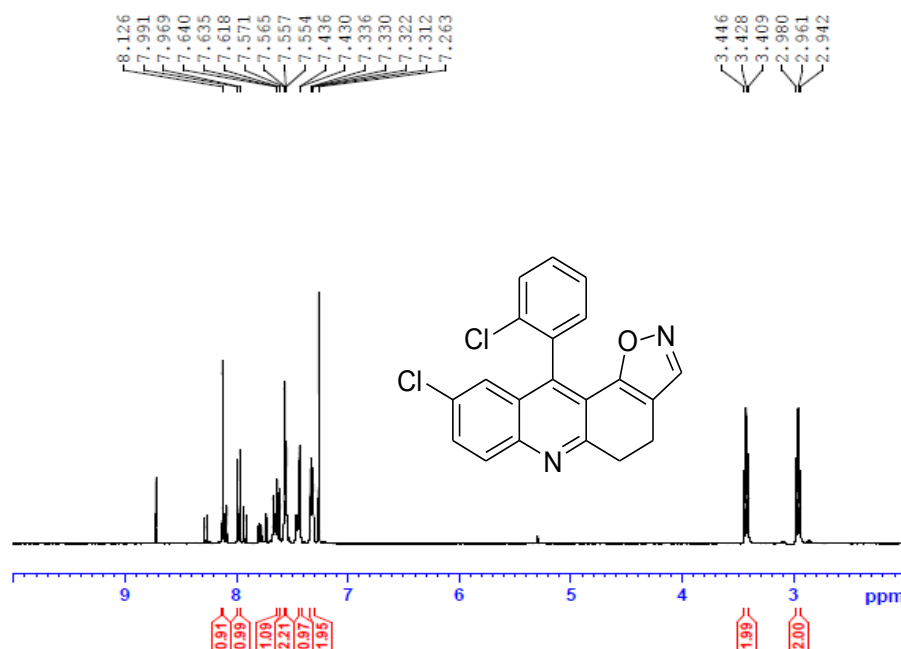

**BRUKER**

Current Data Parameters  
NAME Dr.VVR150916  
EXPNO 42  
PROCNO 1

F2 - Acquisition Parameters  
Date\_ 20160915  
Time 17.17  
INSTRUM spect  
PROBHD 5 mm F4BBO BB/  
PULPROG zg30  
TD 65536  
SOLVENT CDCl3  
NS 64  
DS 2  
SWH 8229.685 Hz  
FIDRES 0.125489 Hz  
AQ 3.9845889 sec  
RG 199.6  
DW 60.800 usec  
DE 6.50 usec  
TE 299.6 K  
D1 1.00000000 sec  
TD0 1

===== CHANNEL f1 =====  
NUC1 1H  
P1 14.25 usec  
PLW1 14.00000000 W  
SFO1 400.2604718 MHz

F2 - Processing parameters  
SI 65536  
SF 400.2580103 MHz  
WDW EM  
SBB 0  
GB 0.30 Hz  
PC 1.00

Figure 79:  $^1\text{H}$  NMR spectrum of 9-chloro-11-(2-chlorophenyl)-4,5-dihydroisoxazolo[5,4-a]acridine (5c):



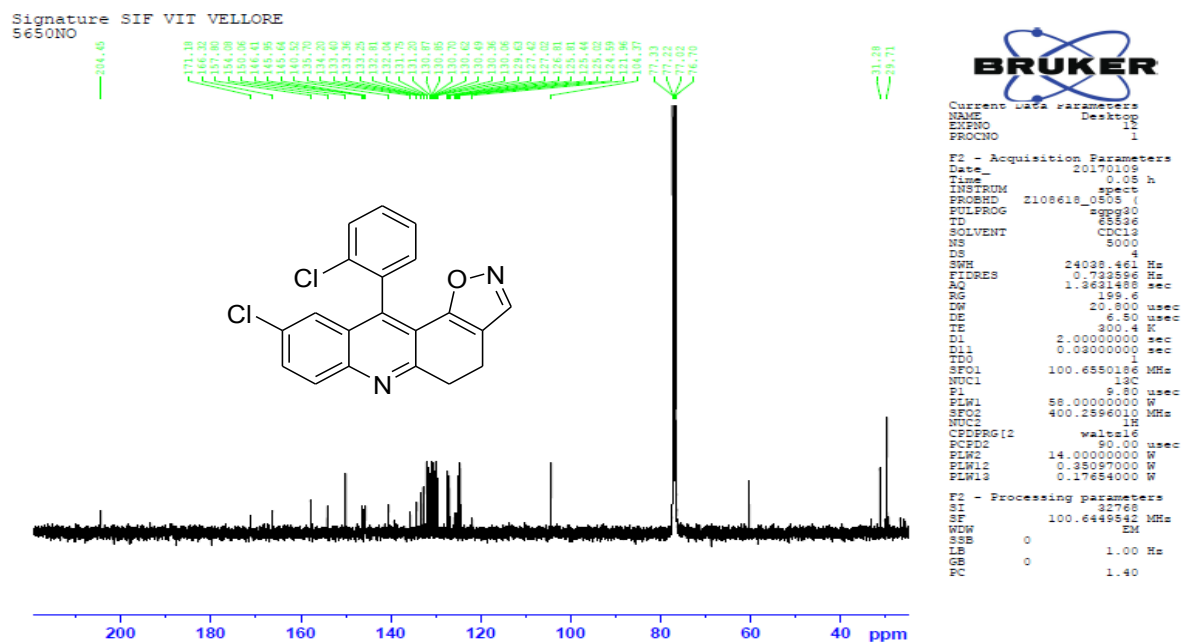

Figure 80:  $^{13}\text{C}$  NMR spectrum of 9-chloro-11-(2-chlorophenyl)-4,5-dihydroisoxazolo[5,4-a]acridine (5c)

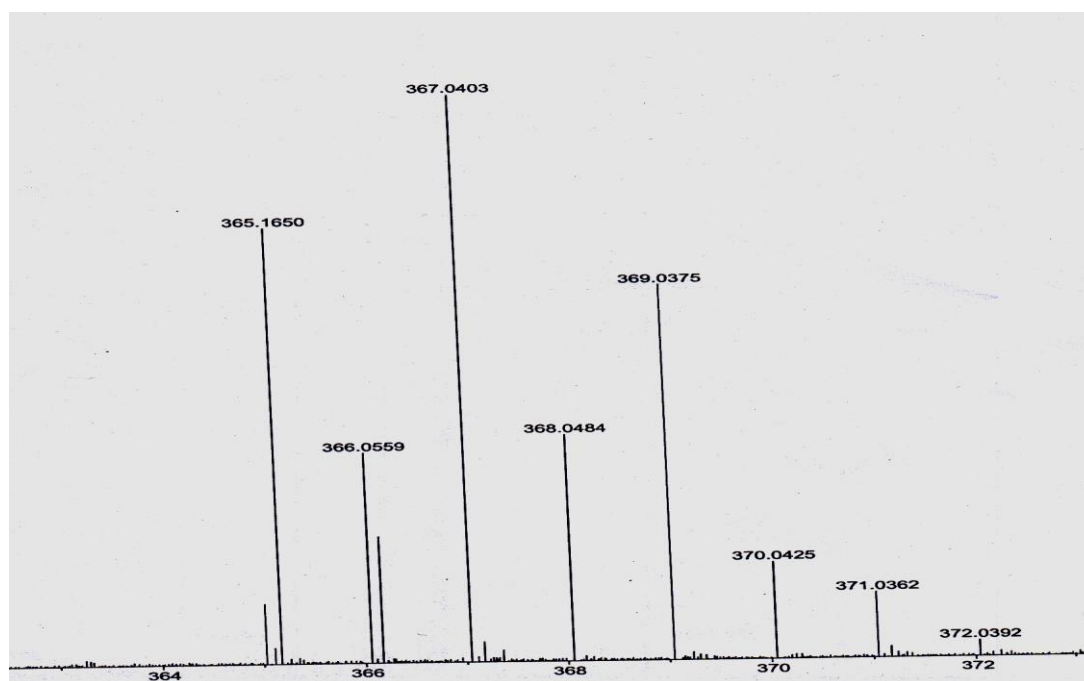

Figure 81: HRMS of 9-chloro-11-(2-chlorophenyl)-4,5-dihydroisoxazolo[5,4-a]acridine (5c):

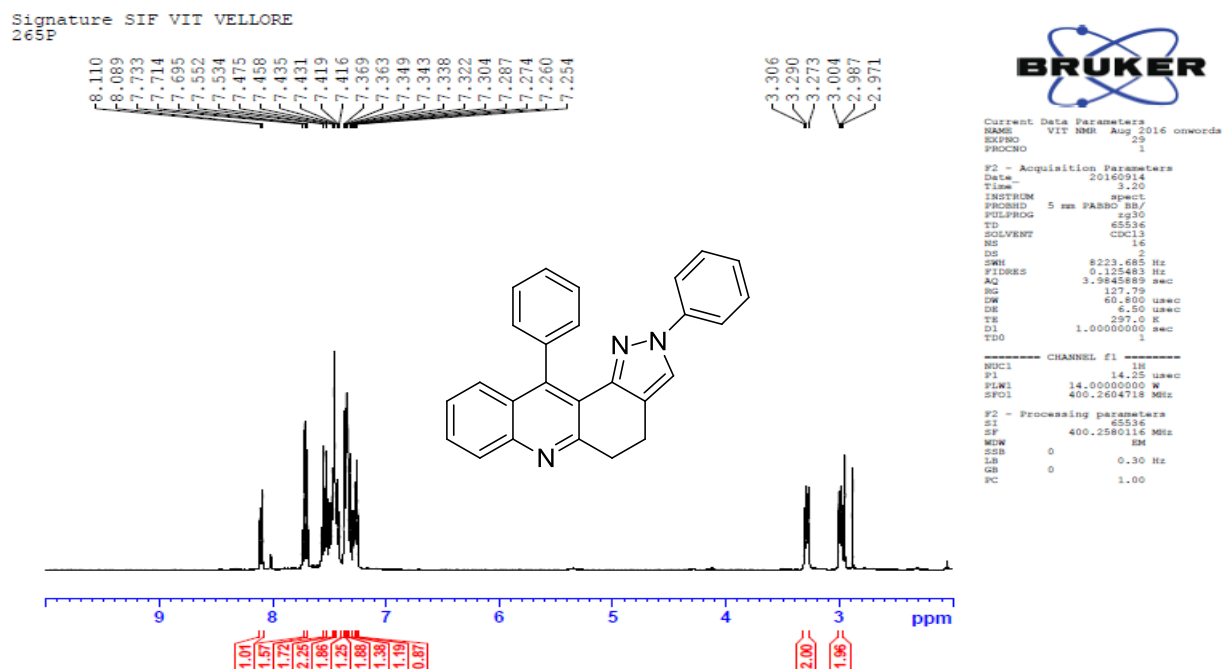Figure 82:  $^1\text{H}$  NMR spectrum of 4,5-dihydro-1,11-diphenyl-1H-pyrazolo[3,4-a]acridine (6a):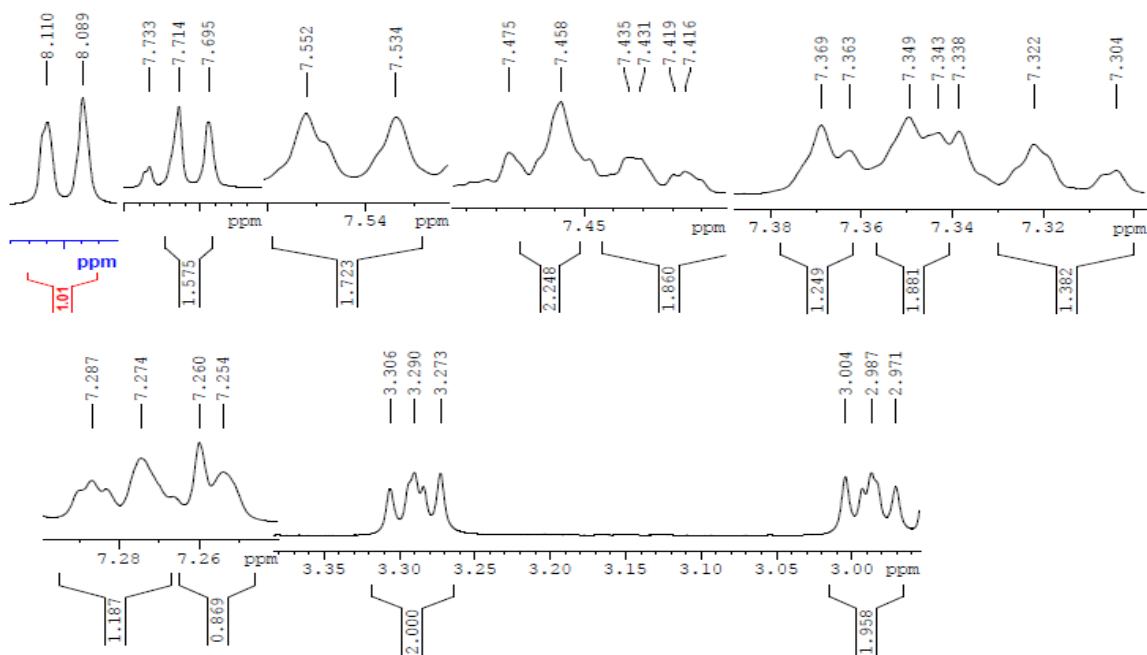Figure 83: Enlarged  $^1\text{H}$  NMR spectrum of 4,5-dihydro-1,11-diphenyl-1H-pyrazolo[3,4-a]acridine (6a):

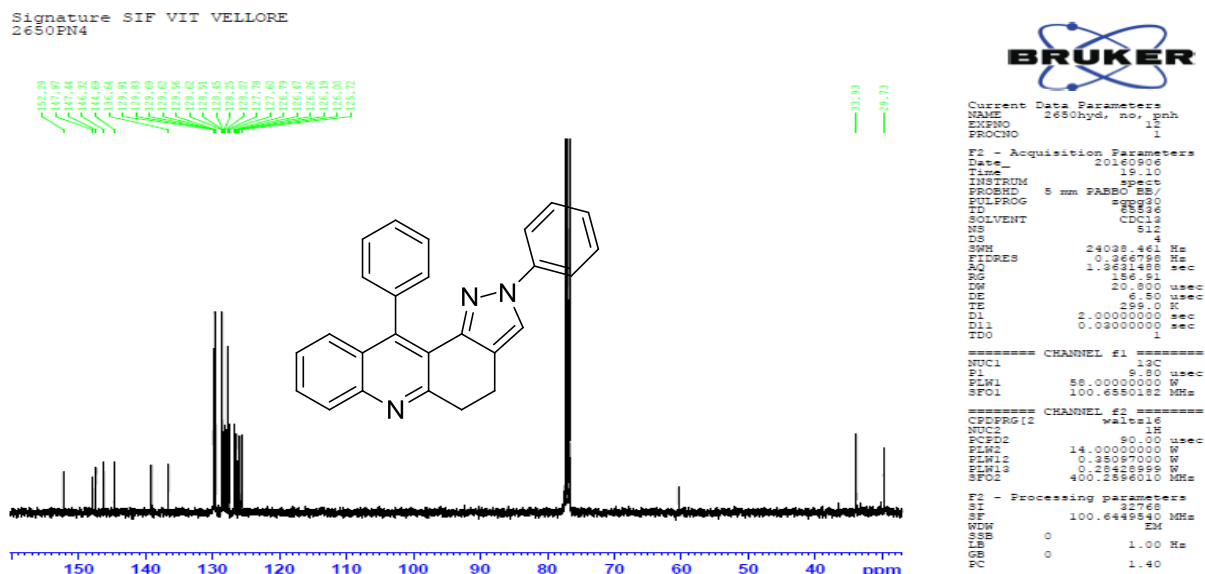Figure 84:  $^{13}\text{C}$  NMR spectrum of 4,5-dihydro-1,11-diphenyl-1H-pyrazolo[3,4-a]acridine (6a):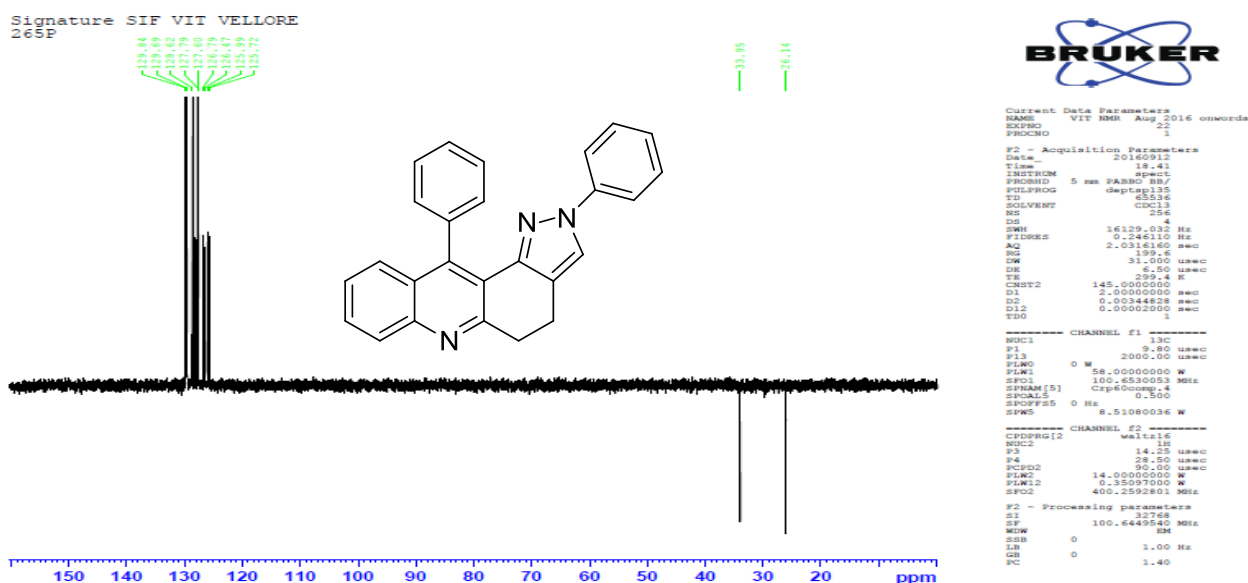

Figure 85: DEPT-135 spectrum of 4,5-dihydro-1,11-diphenyl-1H-pyrazolo[3,4-a]acridine (6a):

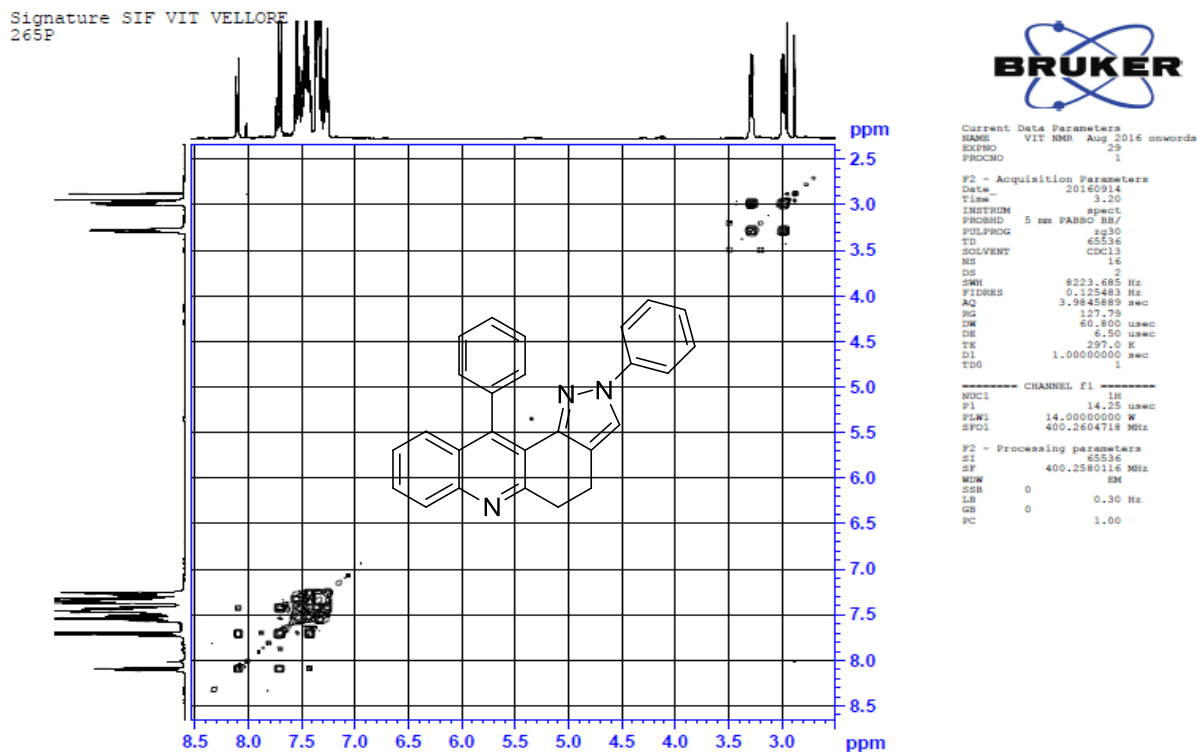

Figure 86: H-H COSY spectrum of 4,5-dihydro-1,11-diphenyl-1H-pyrazolo[3,4-a]acridine (6a):

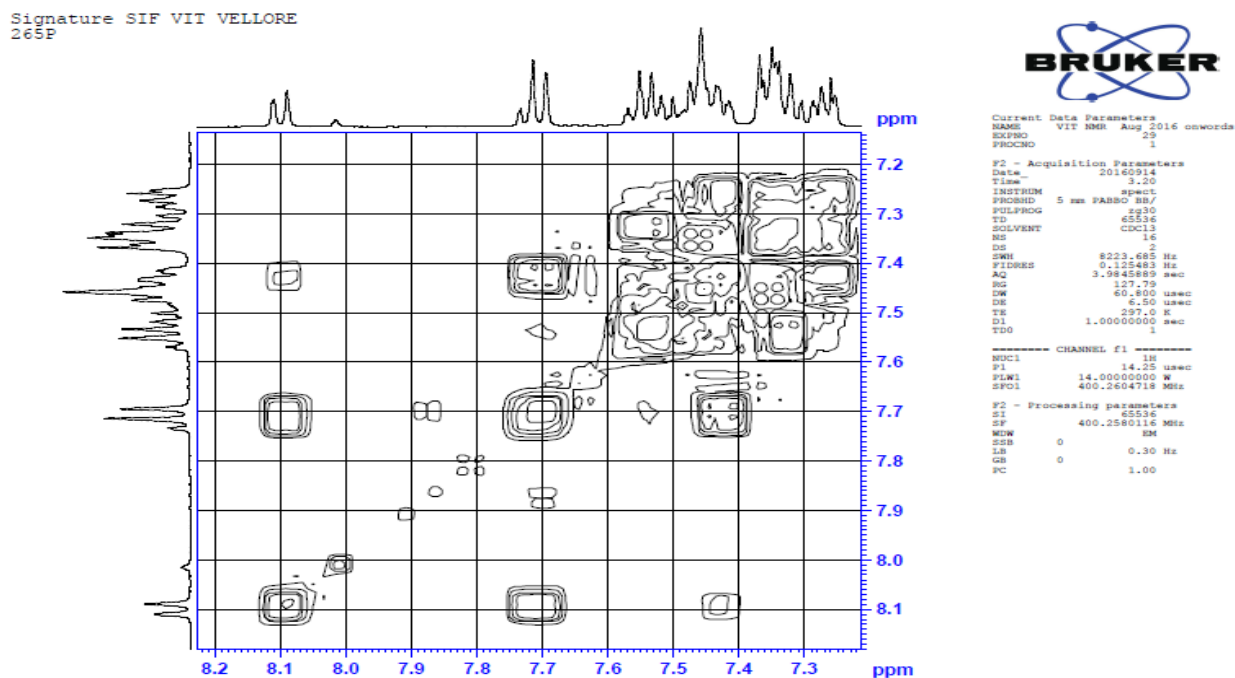

Figure 87: Enlarged H-H COSY spectrum of 4,5-dihydro-1,11-diphenyl-1H-pyrazolo[3,4-a]acridine (6a):

Signature SIF VIT VELLORE  
265P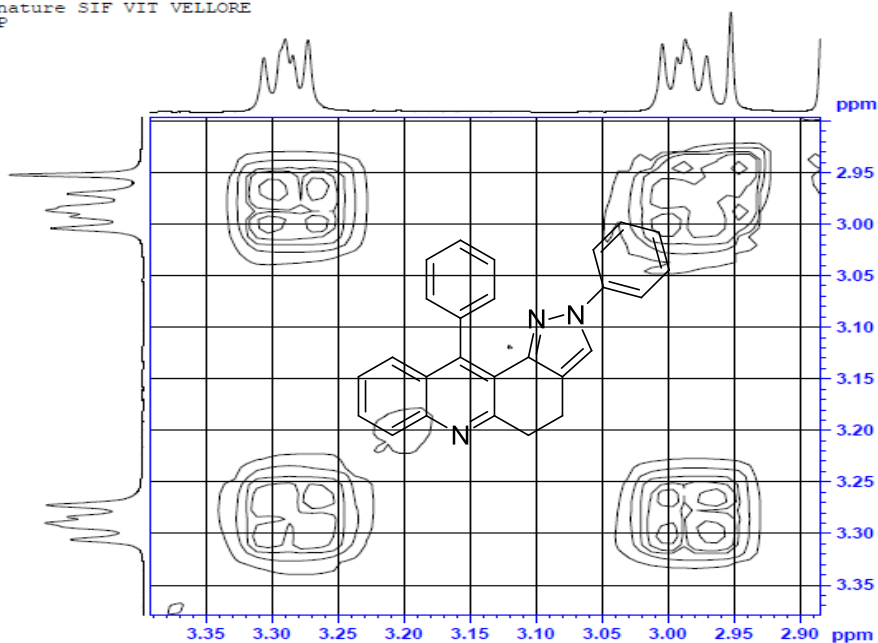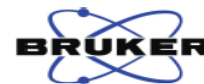Current Data Parameters  
NAME VIT NMR Aug 2016 onwards  
EXPNO 29  
PROCNO 1F2 - Acquisition Parameters  
Date\_ 20160914  
Time\_ 3.20  
INSTRUM spect  
PROBHD 5 mm PARBO BB/  
PULPROG zg30  
TD 65536  
SOLVENT CDCl3  
NS 16  
DS 2  
SWH 8223.685 Hz  
FIDRES 0.125483 Hz  
AQ 3.9845889 sec  
RG 127.79  
DM 60.800 usec  
DE 6.50 usec  
TE 297.0 K  
D1 1.0000000 sec  
TDO 1----- CHANNEL f1 -----  
NUC1 1H  
P1 14.25 usec  
PLW1 14.0000000 W  
SFO1 400.2604718 MHzF2 - Processing parameters  
SI 65536  
SF 400.2580116 MHz  
WDW EM  
SSB 0  
LB 0.30 Hz  
GB 0  
PC 1.00

Figure 88: Enlarged H-H COSY spectrum of 4,5-dihydro-1,11-diphenyl-1H-pyrazolo[3,4-a]acridine (6a):

Signature SIF VIT VELLORE  
265P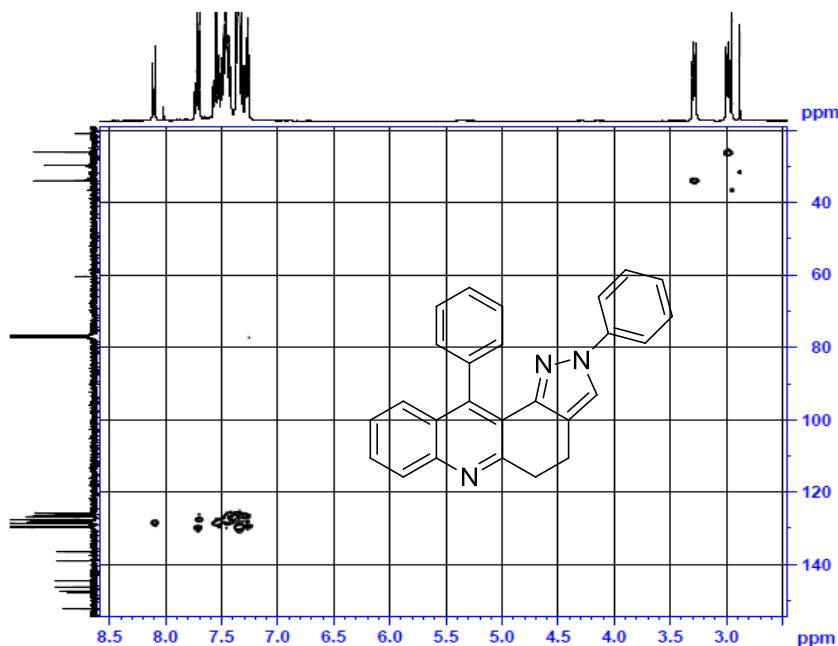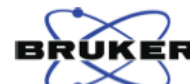Current Data Parameters  
NAME VIT NMR Aug 2016 onwards  
EXPNO 29  
PROCNO 1F2 - Acquisition Parameters  
Date\_ 20160914  
Time\_ 3.20  
INSTRUM spect  
PROBHD 5 mm PARBO BB/  
PULPROG zg30  
TD 65536  
SOLVENT CDCl3  
NS 16  
DS 2  
SWH 8223.685 Hz  
FIDRES 0.125483 Hz  
AQ 3.9845889 sec  
RG 127.79  
DM 60.800 usec  
DE 6.50 usec  
TE 297.0 K  
D1 1.0000000 sec  
TDO 1----- CHANNEL f1 -----  
NUC1 1H  
P1 14.25 usec  
PLW1 14.0000000 W  
SFO1 400.2604718 MHzF2 - Processing parameters  
SI 65536  
SF 400.2580116 MHz  
WDW EM  
SSB 0  
LB 0.30 Hz  
GB 0  
PC 1.00

Figure 89: HSQC spectrum of 4,5-dihydro-1,11-diphenyl-1H-pyrazolo[3,4-a]acridine (6a):

Signature SIF VIT VELLORE  
265P

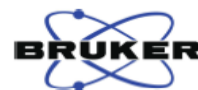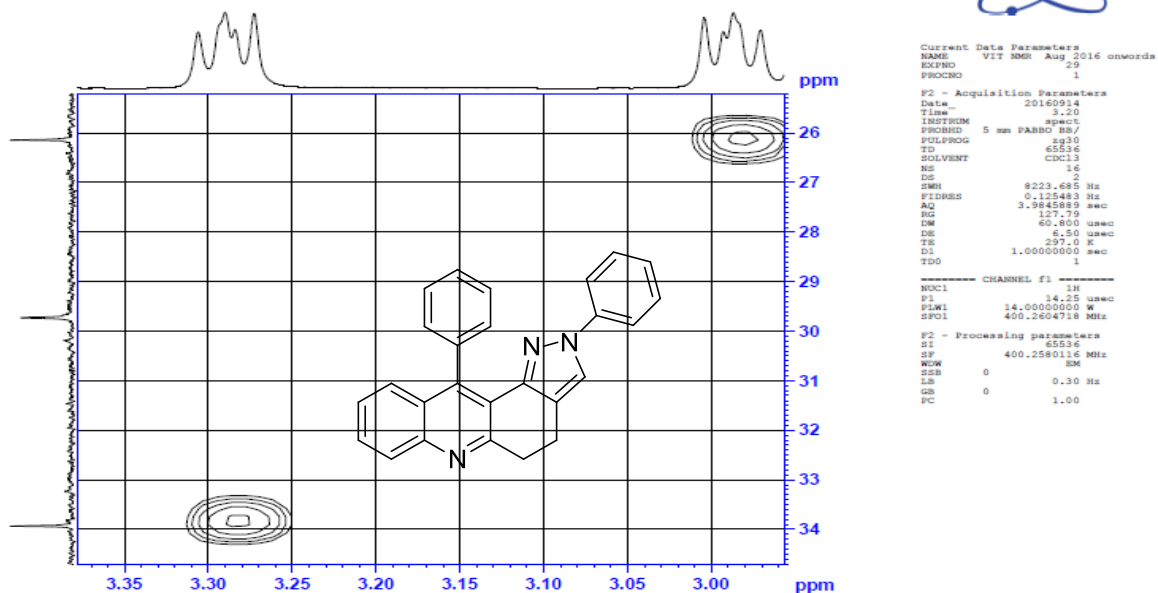

Figure 90: Enlarged HSQC spectrum of 4,5-dihydro-1,11-diphenyl-1H-pyrazolo[3,4-a]acridine (6a):

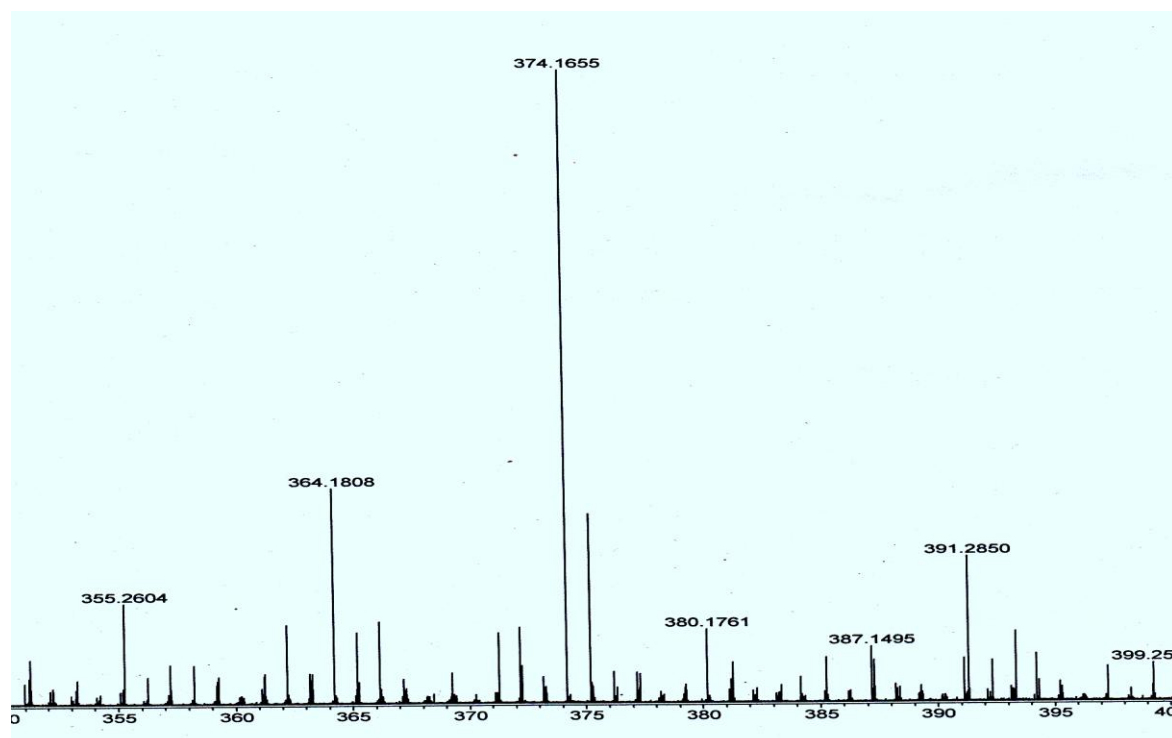

Figure 91: HRMS of 4,5-dihydro-1,11-diphenyl-1H-pyrazolo[3,4-a]acridine (6a):

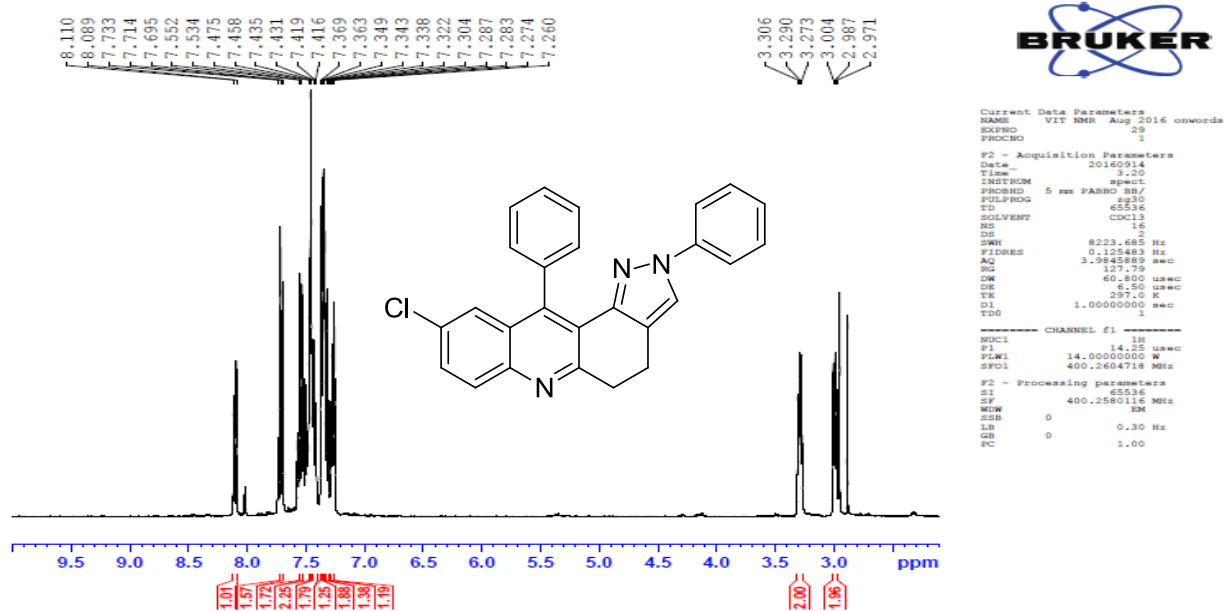Figure 92: <sup>1</sup>H NMR spectrum of 9-chloro-4,5-dihydro-1,11-diphenyl-1H-pyrazolo[3,4-a]acridine (6b):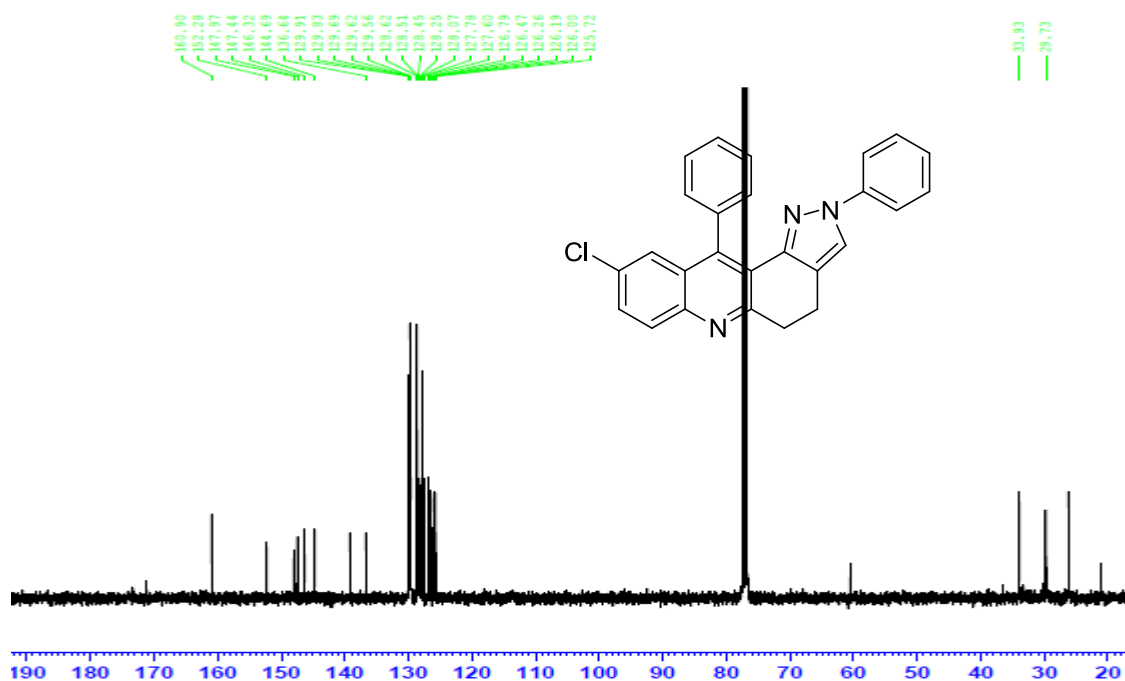Figure 93: <sup>13</sup>C NMR spectrum of 9-chloro-4,5-dihydro-1,11-diphenyl-1H-pyrazolo[3,4-a]acridine (6b):

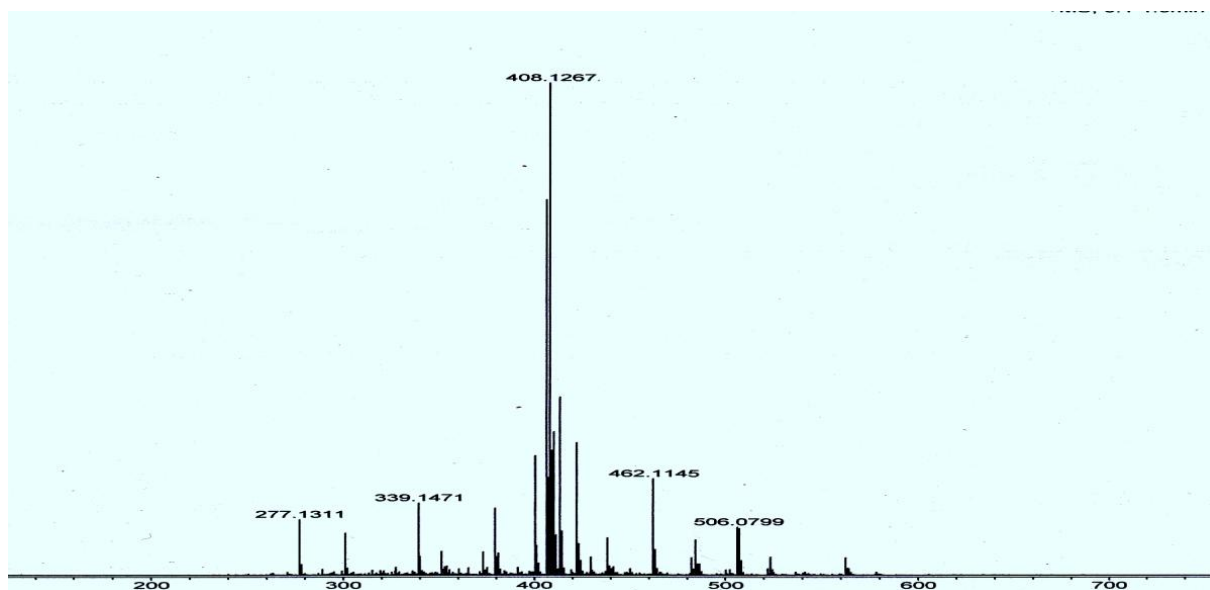

Figure 94: HRMS of 9-chloro-4,5-dihydro-1,11-diphenyl-1H-pyrazolo[3,4-a]acridine (6b):

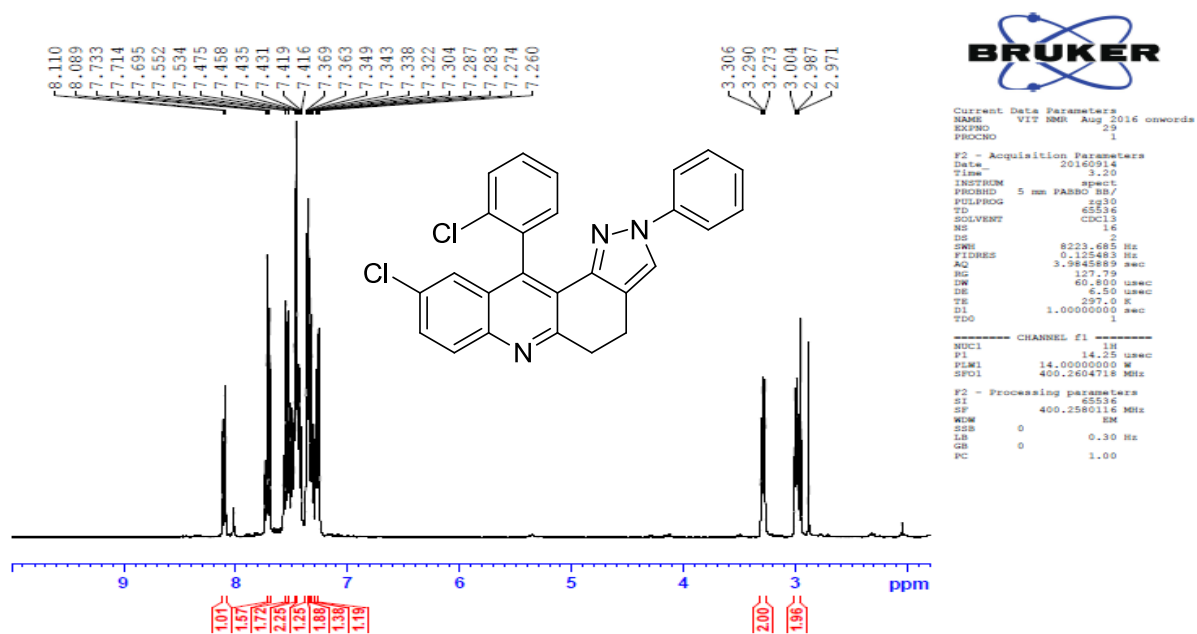

Figure 95: <sup>1</sup>H NMR spectrum of 9-chloro-11-(2-chlorophenyl)-4,5-dihydro-1-phenyl-1H-pyrazolo[3,4-a]acridine (6c):



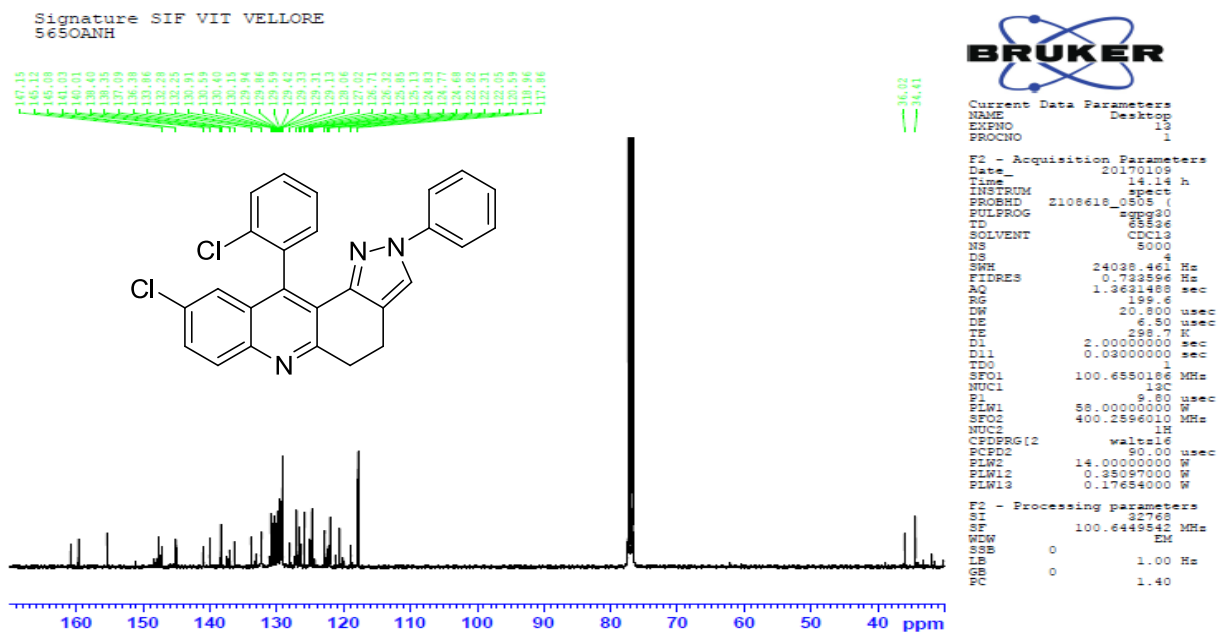

Figure 96:  $^{13}\text{C}$  NMR spectrum of 9-chloro-11-(2-chlorophenyl)-4,5-dihydro-1-phenyl-1H-pyrazolo[3,4-a]acridine (6c):

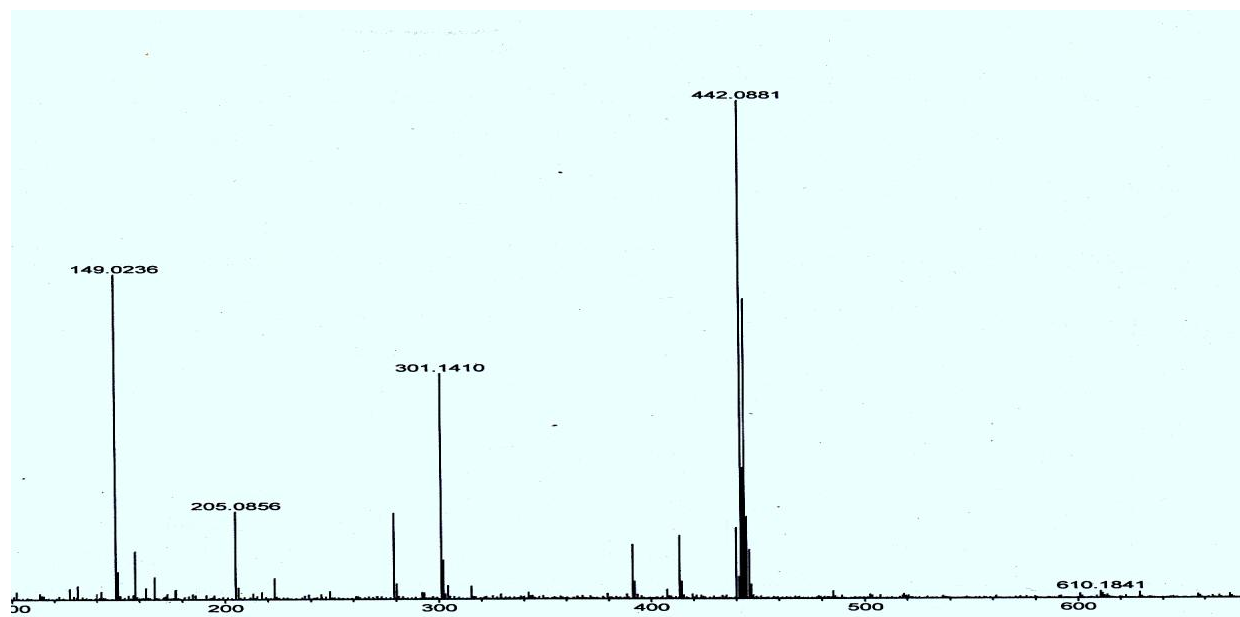

Figure 97: HRMS of 9-chloro-11-(2-chlorophenyl)-4,5-dihydro-1-phenyl-1H-pyrazolo[3,4-a]acridine (6c):
